# Supplementary material for: A chemoselective Ugi-type reaction in water using TMSCN as a functional isonitrile equivalent: generation of heteroaromatic molecular diversity
Source: Royal Society of Chemistry journal article supplement (doi:10.1039/c2ob26733k), 2012-01-01

**Electronic Supplementary Information**

**A Chemoselective Ugi-type reaction in Water Using TMSCN as Functional Isonitrile Equivalent:**

**Generation of Heteroaromatic Molecular Diversity**

Sankar Kumar Guchhait,\* Vikas Chaudhary and Chetna Madaan

*Department of Medicinal Chemistry*

*National Institute of Pharmaceutical Education and Research (NIPER), S. A. S. Nagar (Mohali) - 160062,*

*Punjab, India, Fax: 91 (0)172 2214692; Tel: 91 (0)172 2214683*

*Email: [skguchhait@niper.ac.in](mailto:skguchhait@niper.ac.in)*

## Table of Contents

|                                            |         |
|--------------------------------------------|---------|
| General Information.....                   | S1      |
| Spectra of compounds ( <b>4a-r</b> ) ..... | S2-S37  |
| Spectra of compounds ( <b>7a-f</b> ) ..... | S38-S49 |

## General Information

$^1\text{H}$  NMR spectra were recorded on a Bruker Avance III-400 (400 MHz) spectrometer using tetramethylsilane as an internal standard and NMR solvent  $\text{CD}_3\text{OD}$  or  $\text{DMSO}-d_6$ . Chemical shifts are in ppm. The  $^1\text{H}$  NMR data includes the integration, multiplicity (s = singlet, d = doublet, t = triplet, q = quartet, m = multiplet, td = triplet of doublet, dt = doublet of triplet, br = broad), and coupling constants (Hz).  $^{13}\text{C}$  NMR spectra were recorded on a Bruker Avance III-400 (100 MHz) spectrometer with complete proton decoupling. Chemical shifts are in ppm with NMR solvent as an internal standard. The acquisition of High-resolution mass spectra (HRMS) was performed on Bruker maxis Q-TOF. Infrared (IR) spectra were recorded on a Perkin Elmer FTIR with ATR and IR Microscope spectrometer. For thin layer chromatography (TLC) analysis, Merck precoated TLC plates (silica gel 60 GF 254, 0.25 mm) were used. Melting points determined are uncorrected. The starting materials and solvents were used as received from commercial sources without further purification.

## Spectra of compounds (4a-r)

Table 1, entry 6; 4a:  $^1\text{H}$  NMR

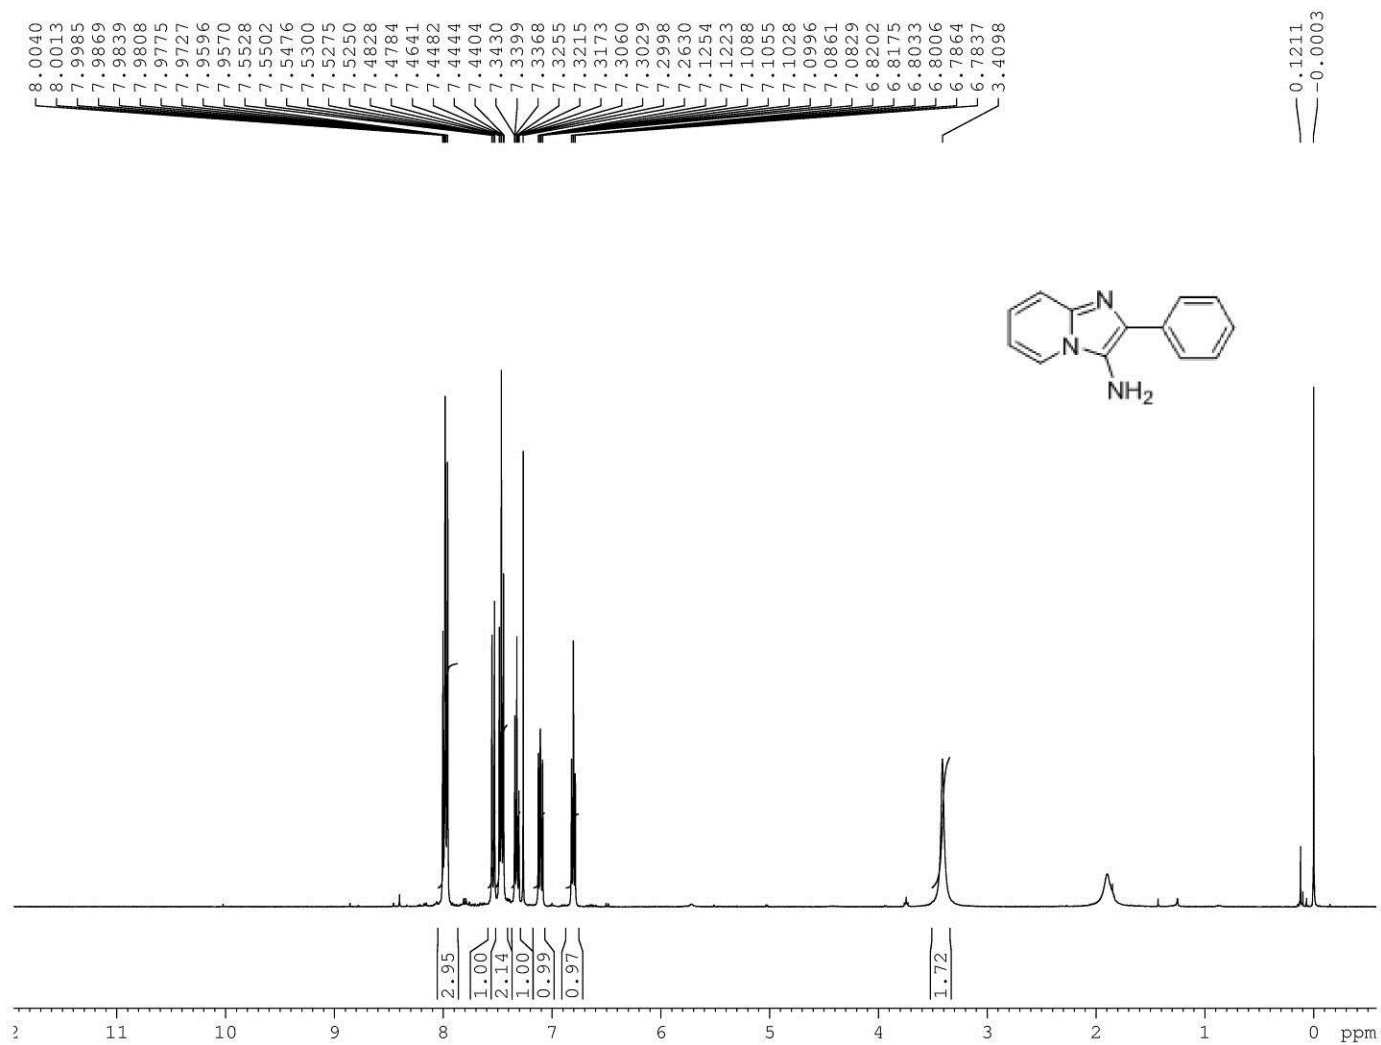

Table 1, entry 6; 4a:  $^{13}\text{C}$  NMR

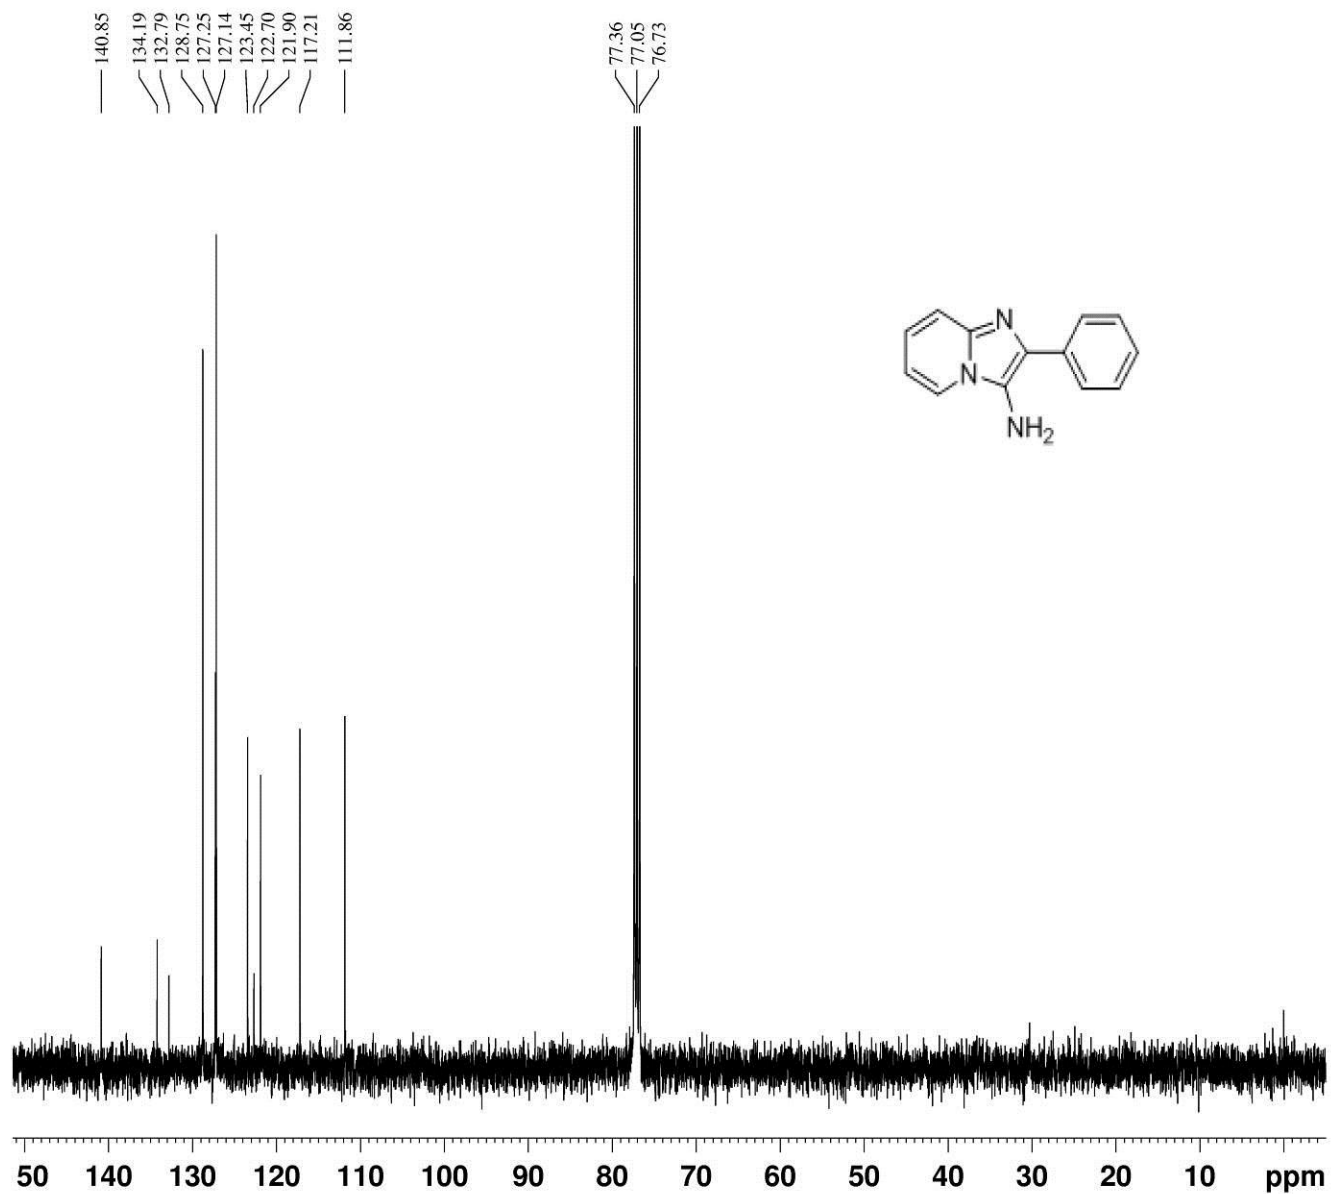

Table 2, entry 1; 4b:  $^1\text{H}$  NMR

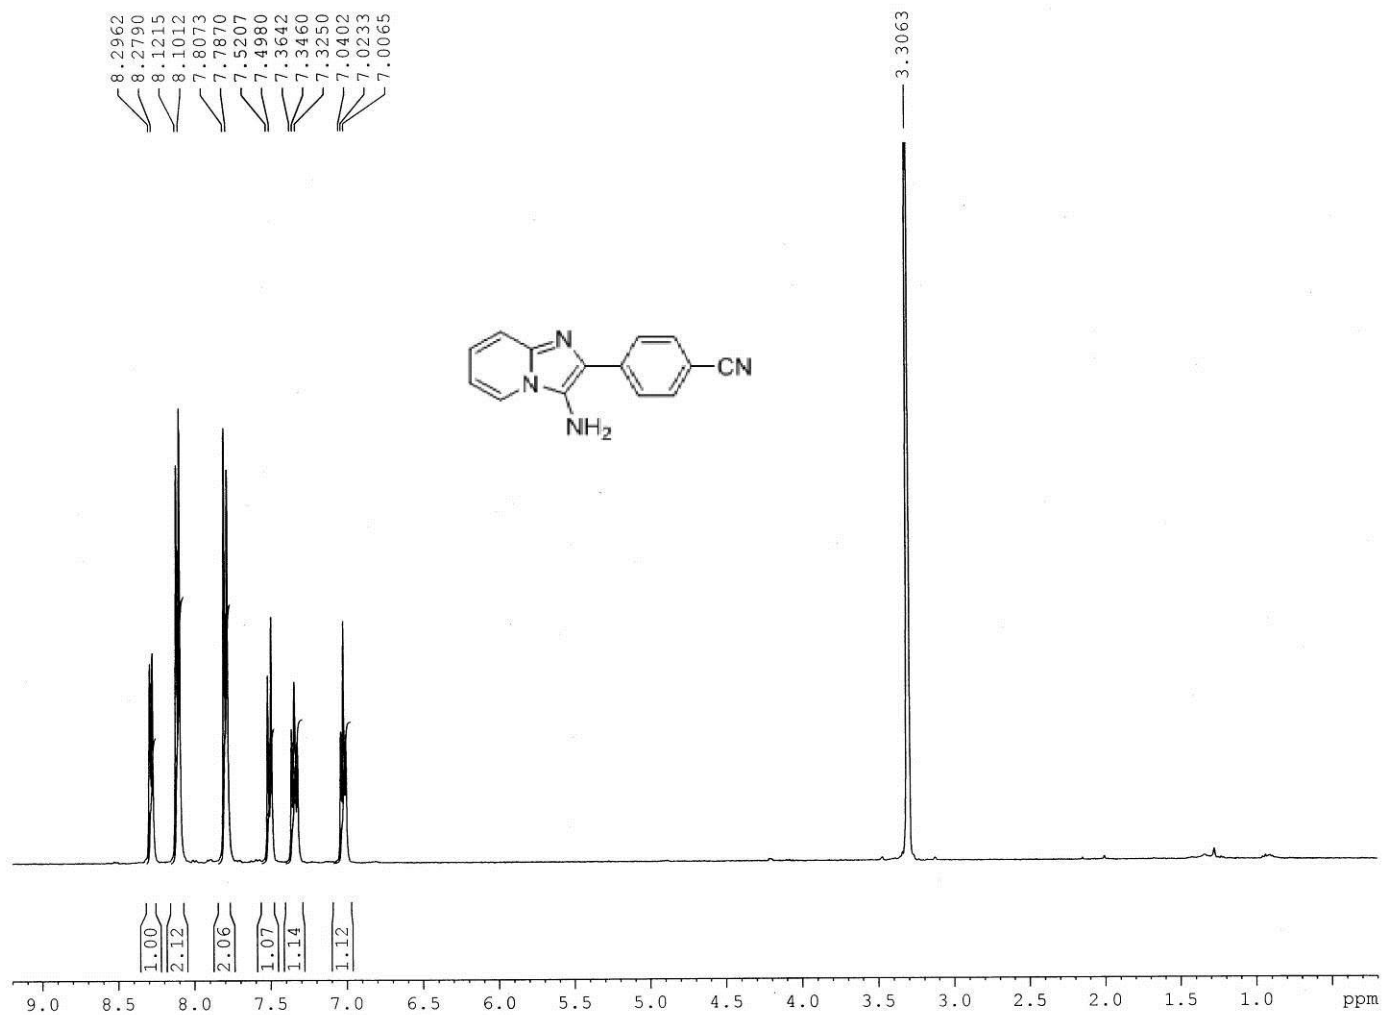

Table 2, entry 1; 4b:  $^{13}\text{C}$  NMR

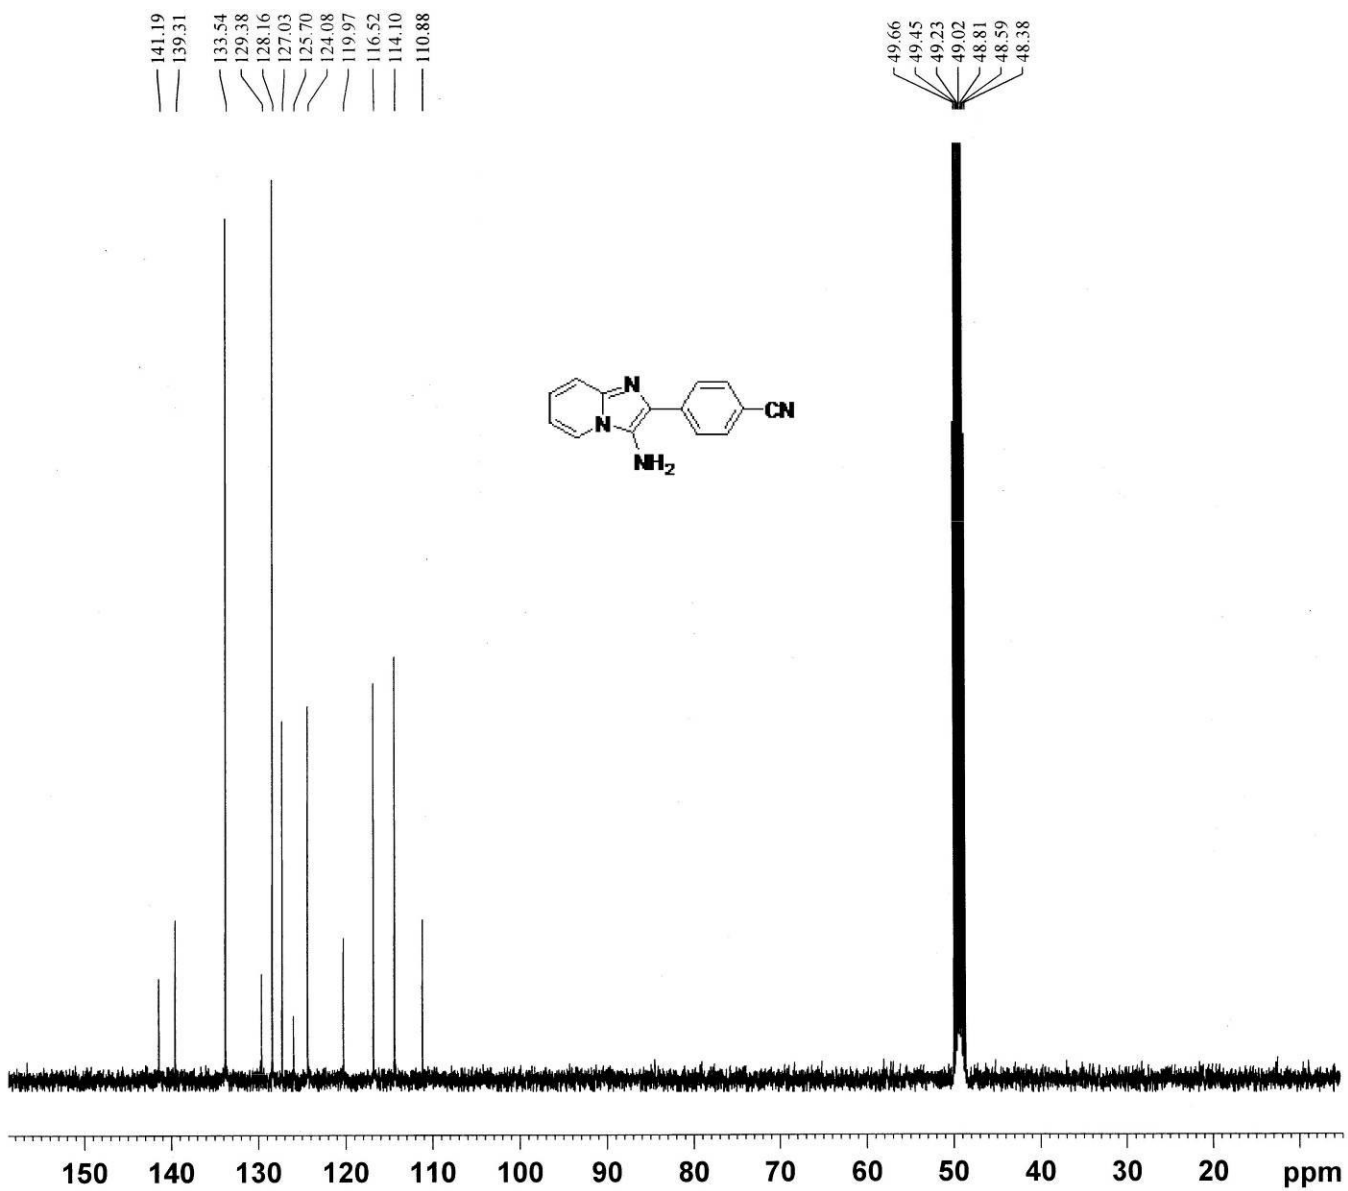

Table 2, entry 2; 4c:  $^1\text{H}$  NMR

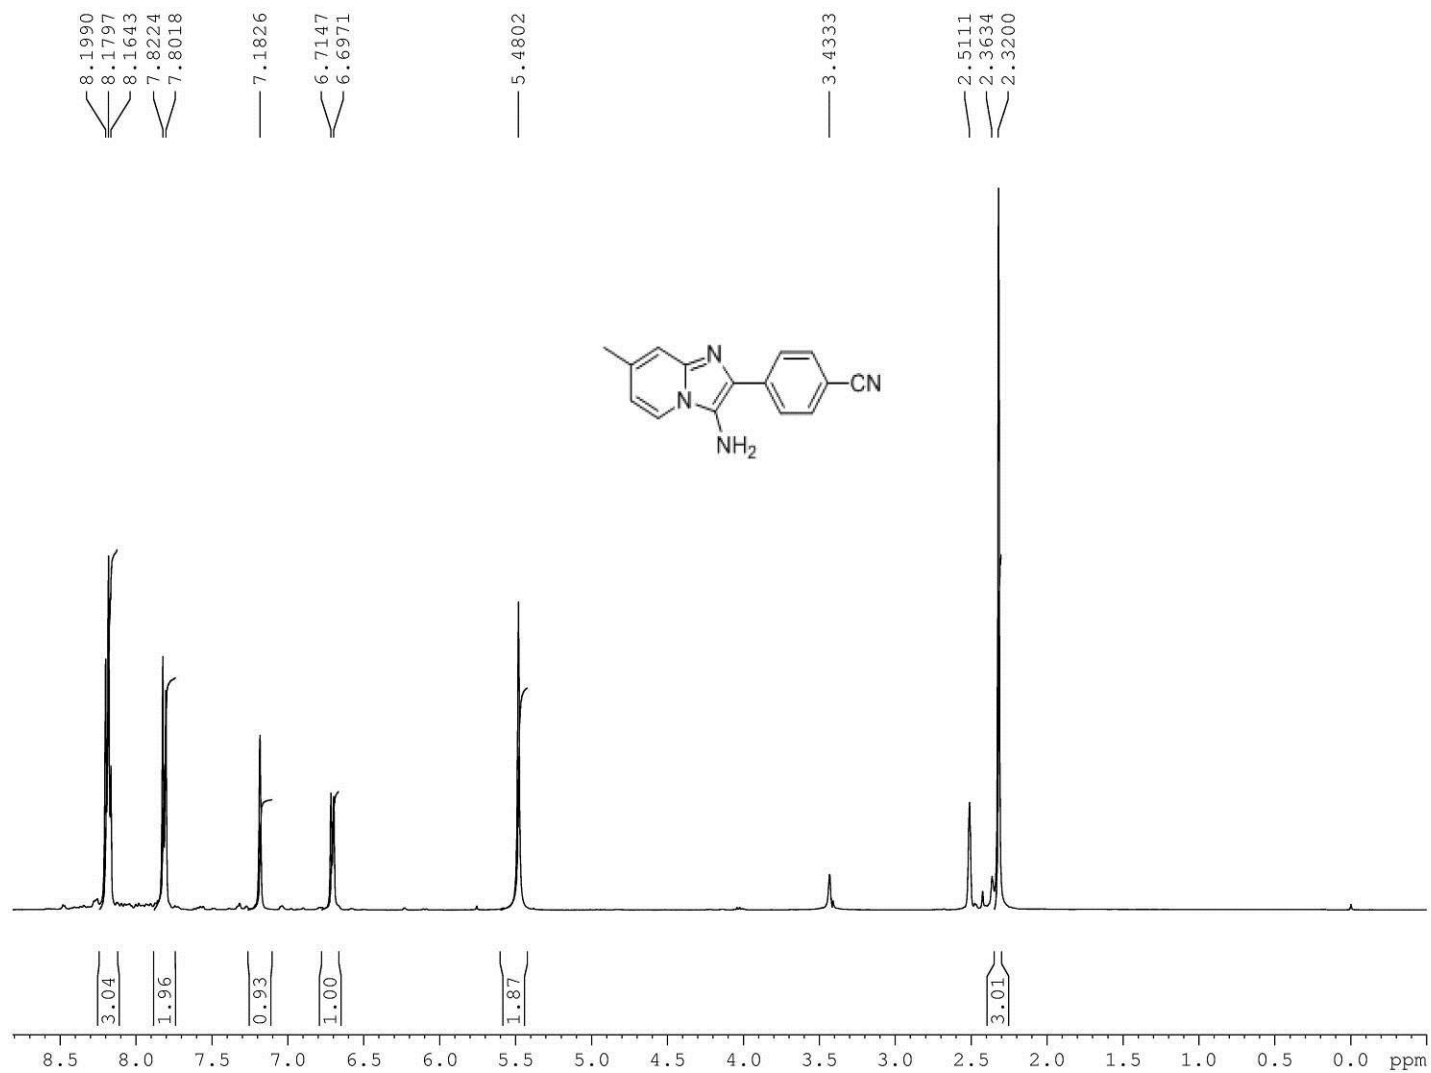



Table 2, entry 2; 4c:  $^{13}\text{C}$  NMR

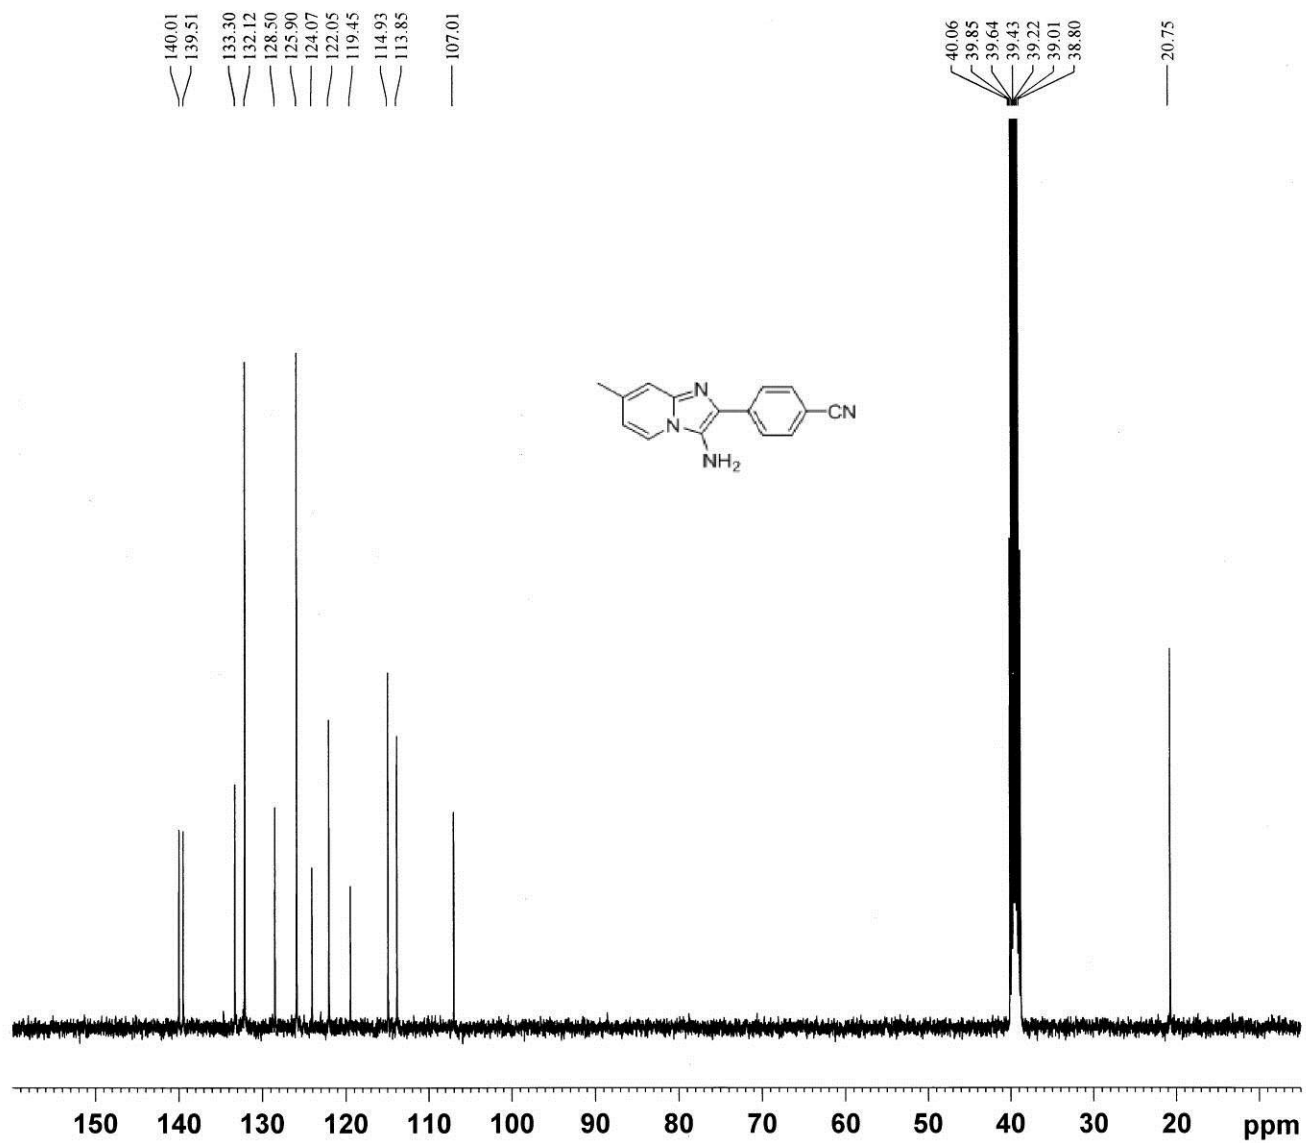

Table 2, entry 3; 4d:  $^1\text{H}$  NMR

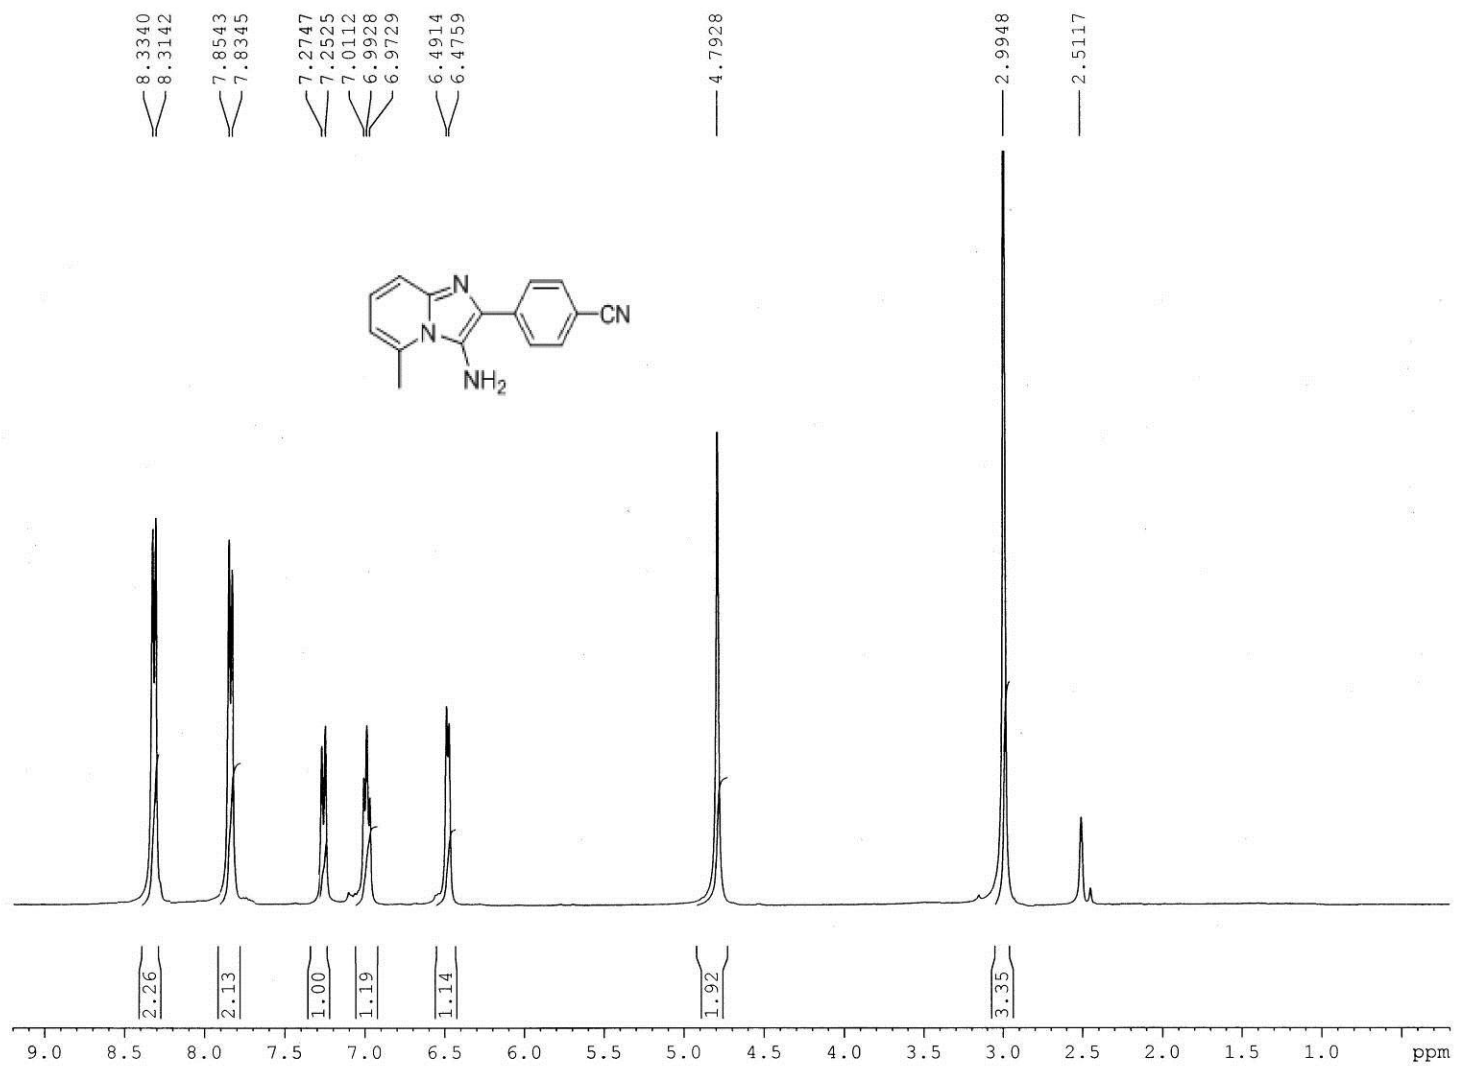

Table 2, entry 3; 4d:  $^{13}\text{C}$  NMR

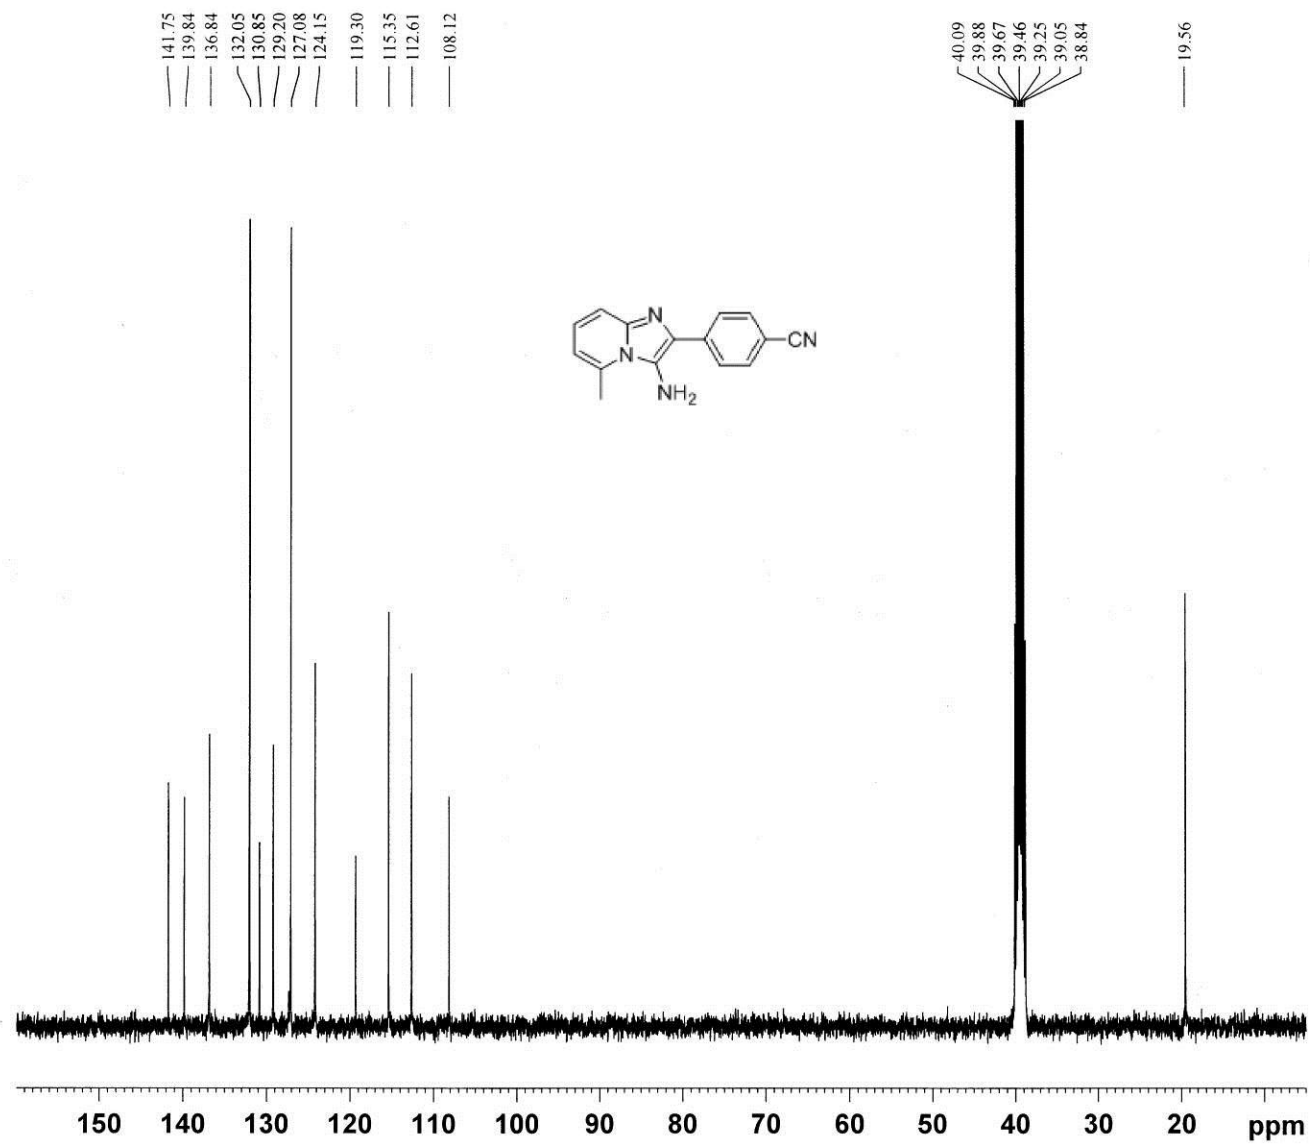

Table 2, entry 4; 4e:  $^1\text{H}$  NMR

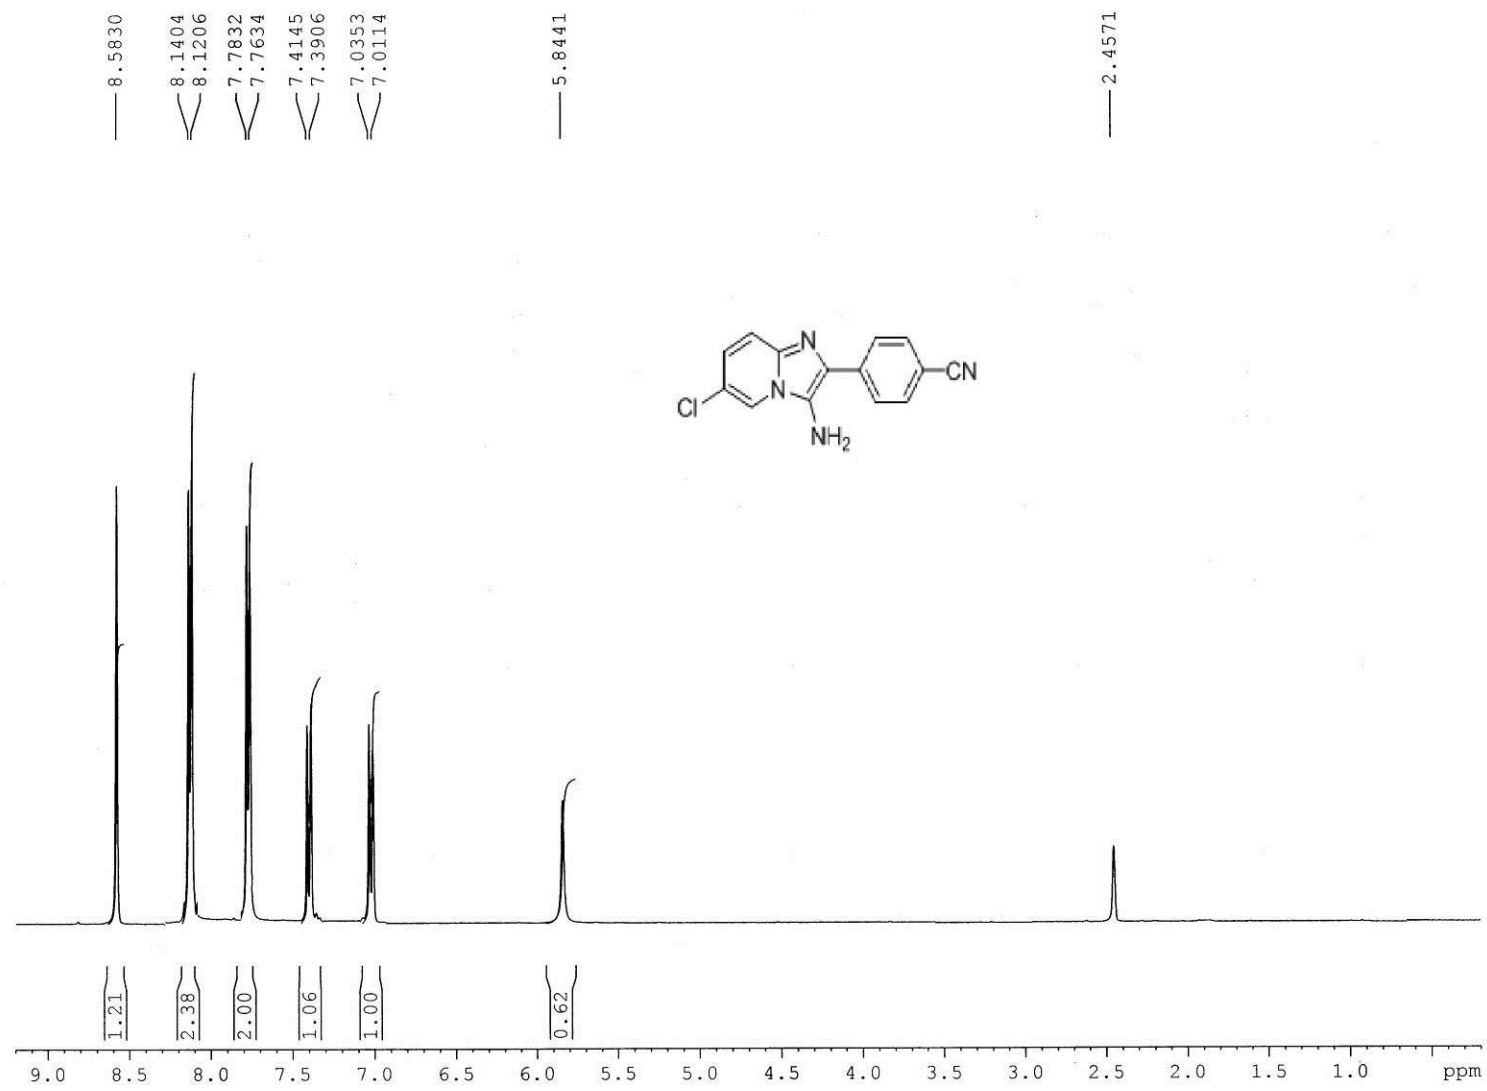

Table 2, entry 4; 4e:  $^{13}\text{C}$  NMR

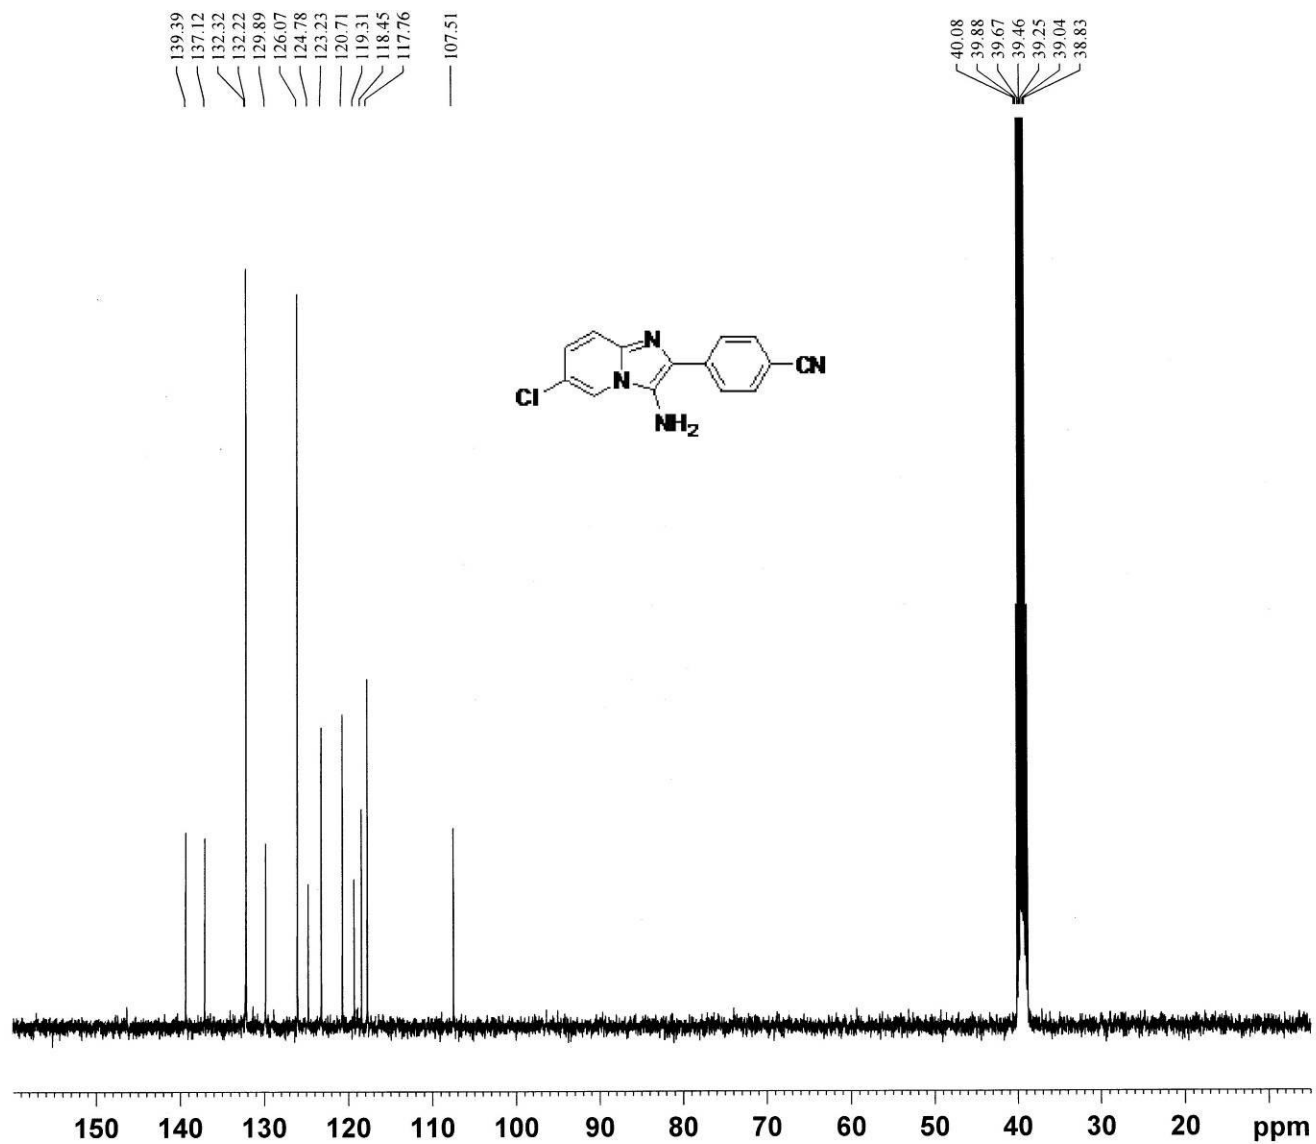

Table 2, entry 5; 4f:  $^1\text{H}$  NMR

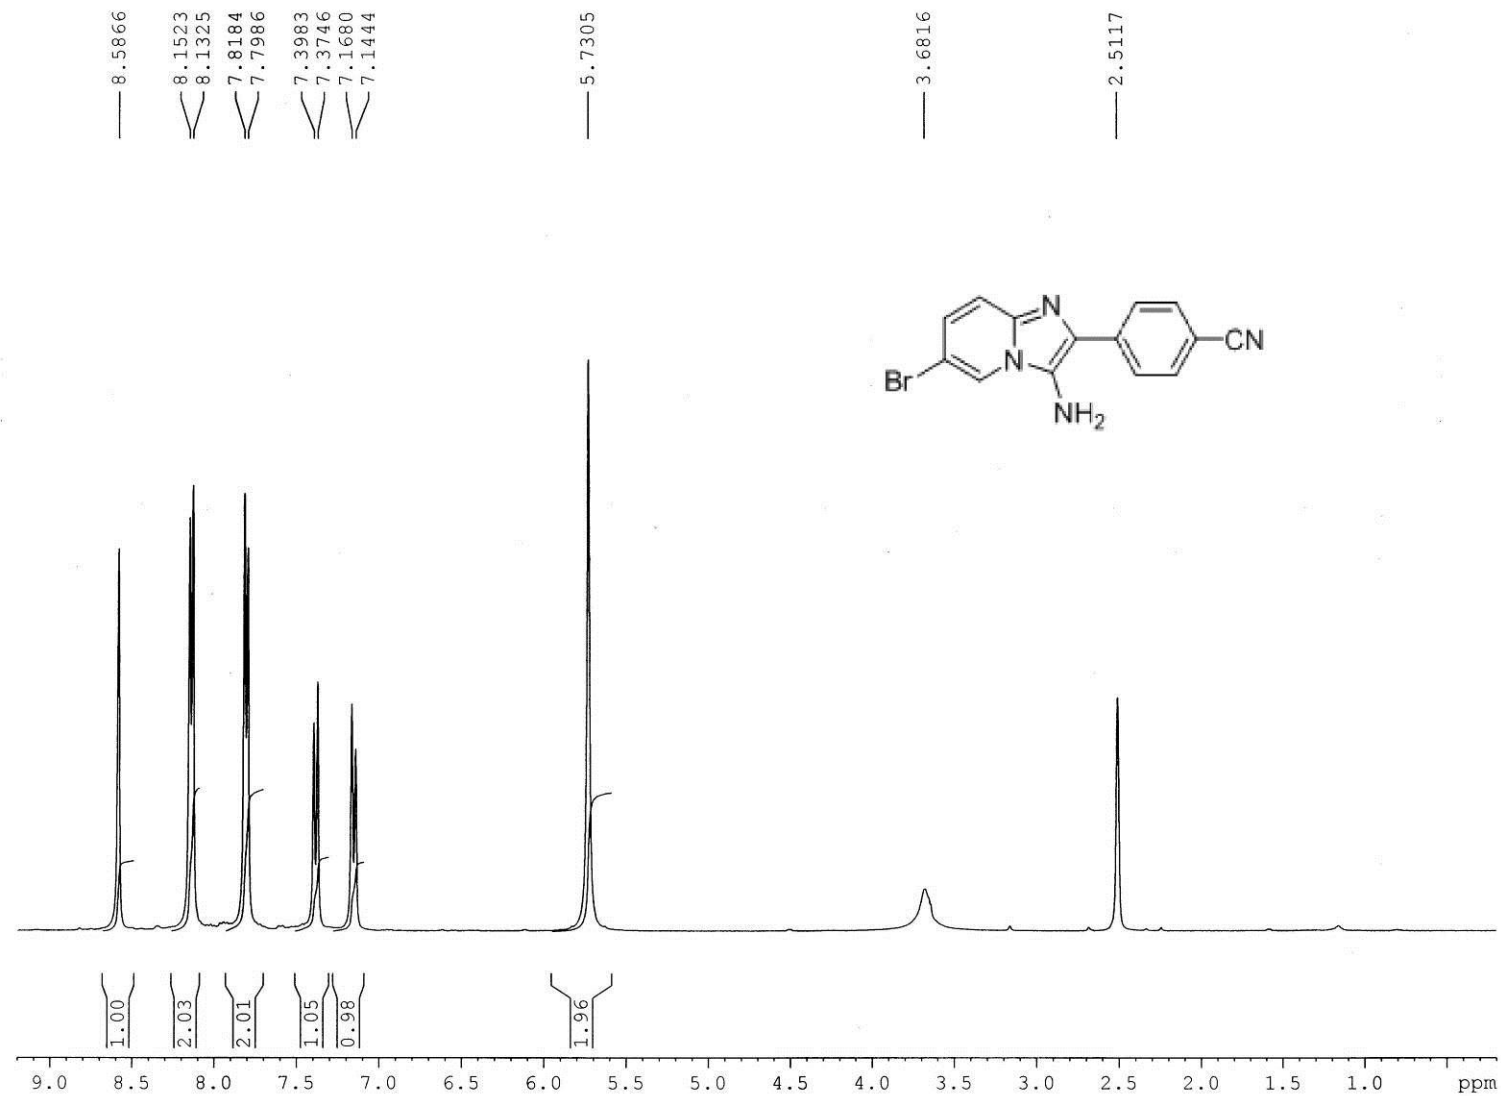

Table 2, entry 5; 4f:  $^{13}\text{C}$  NMR

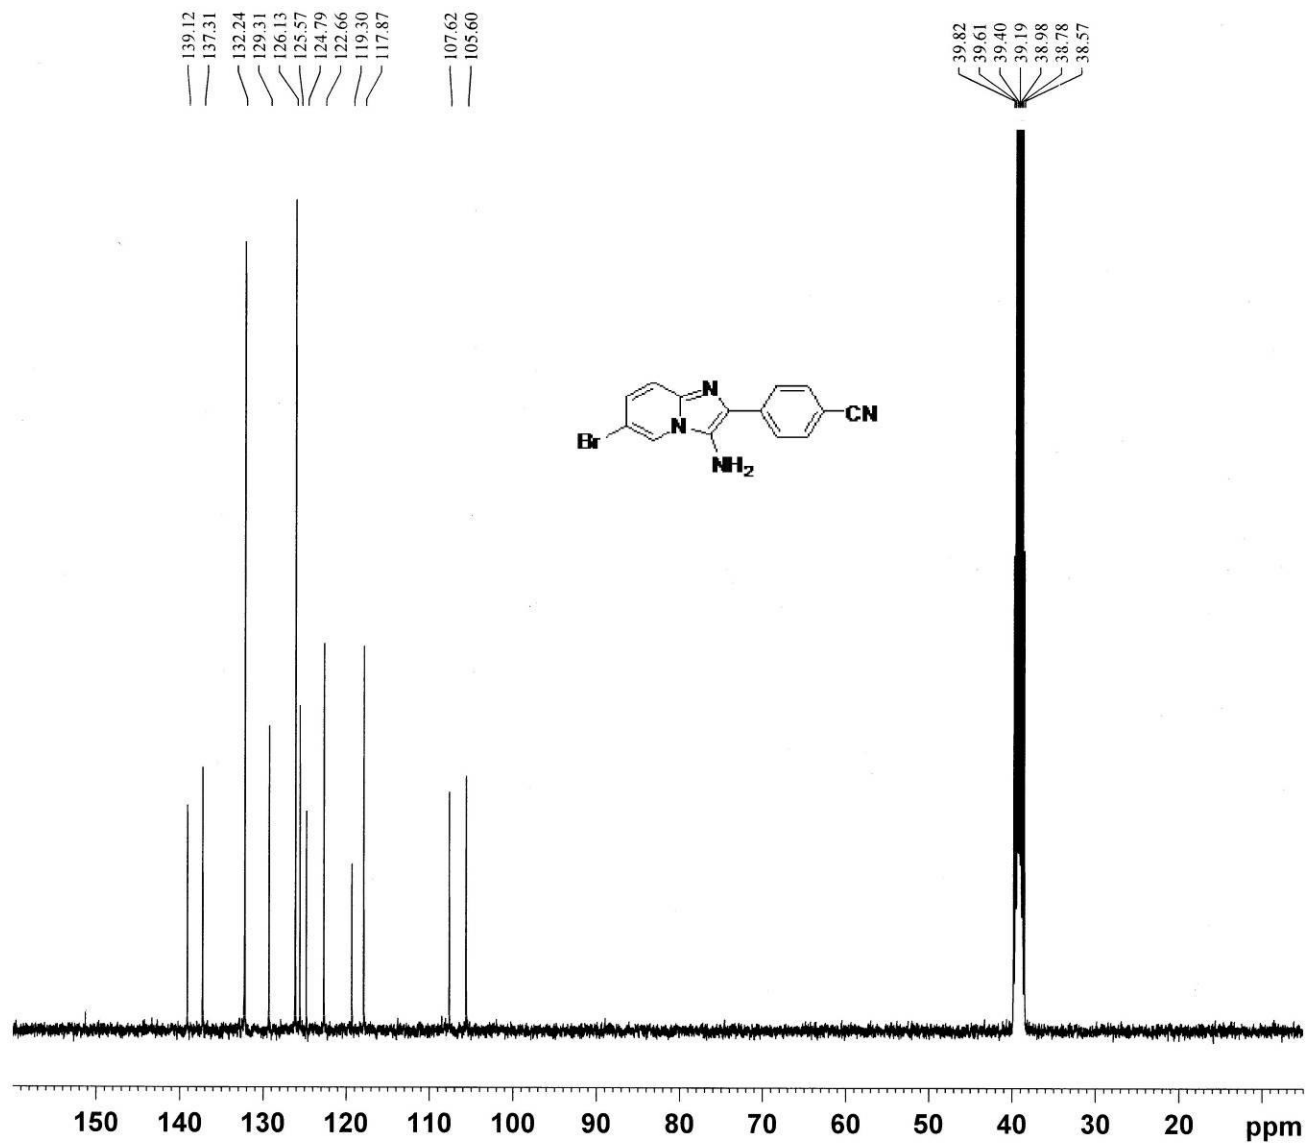

Table 2, entry 6; 4g:  $^1\text{H}$  NMR

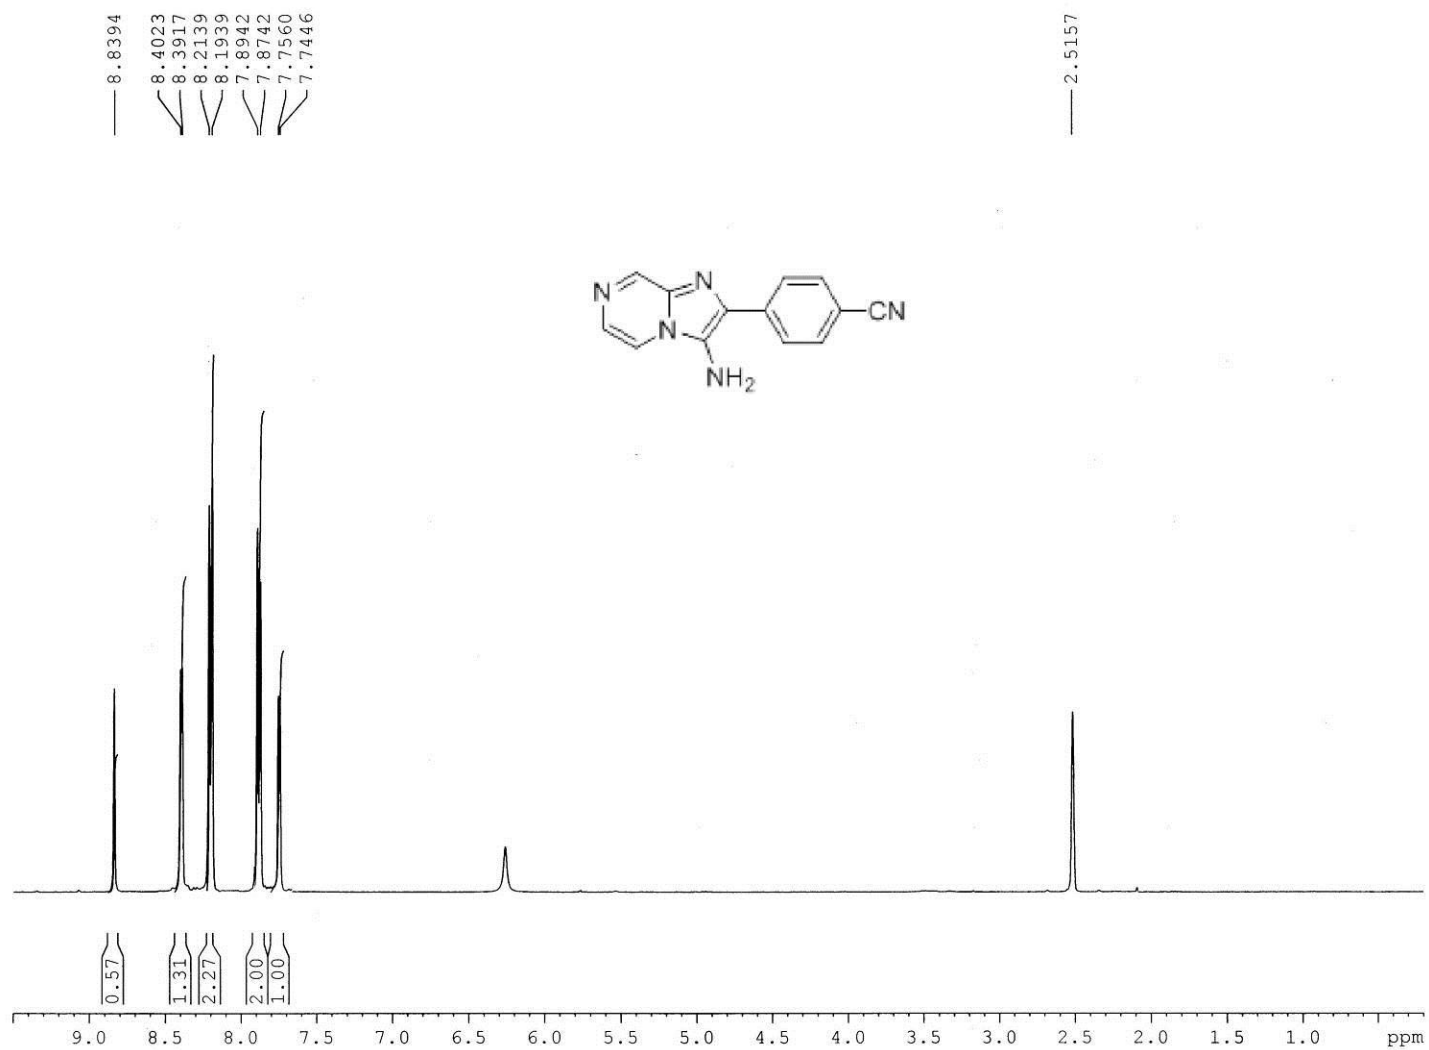



Table 2, entry 6; 4g:  $^{13}\text{C}$  NMR

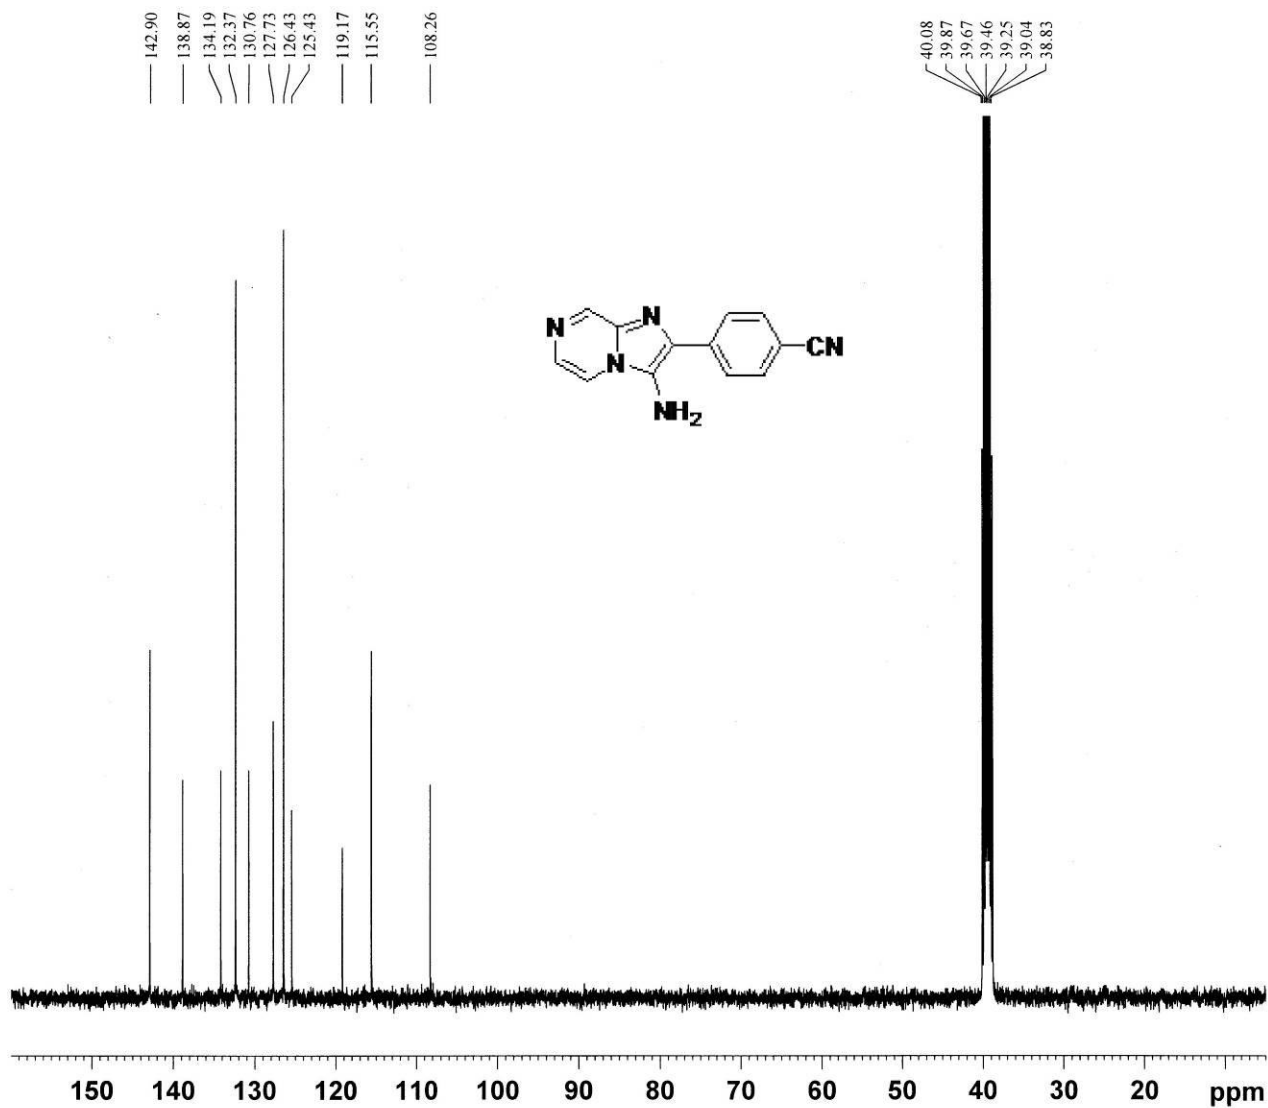

Table 2, entry 7; 4h:  $^1\text{H}$  NMR

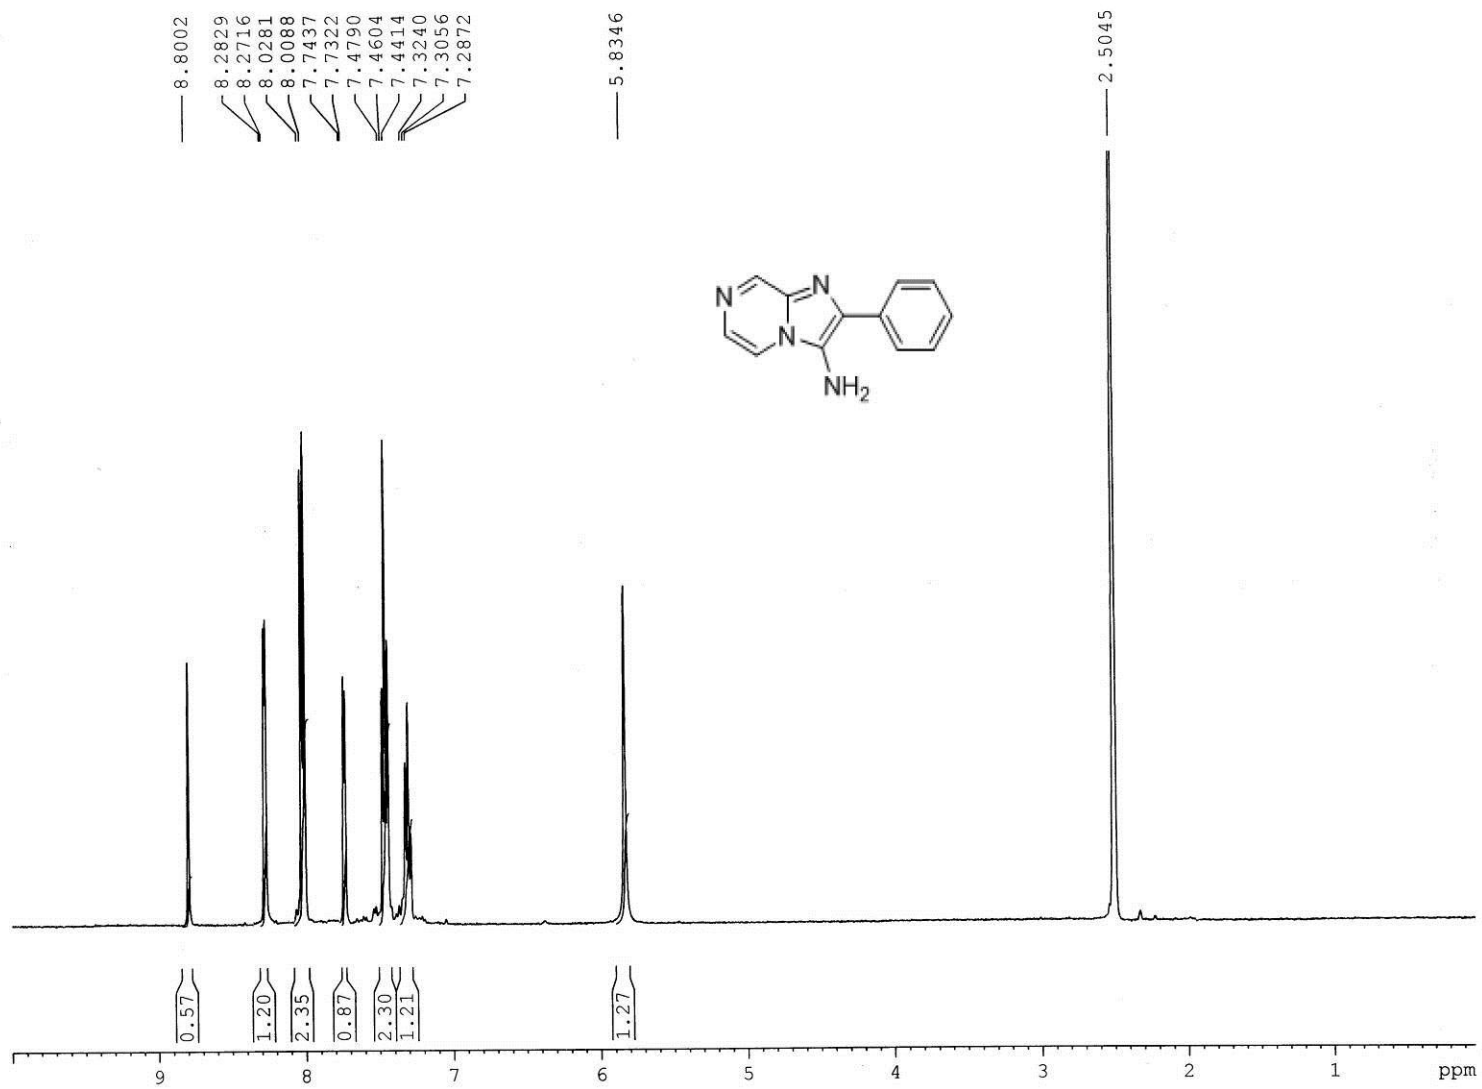

Table 2, entry 7; 4h:  $^{13}\text{C}$  NMR

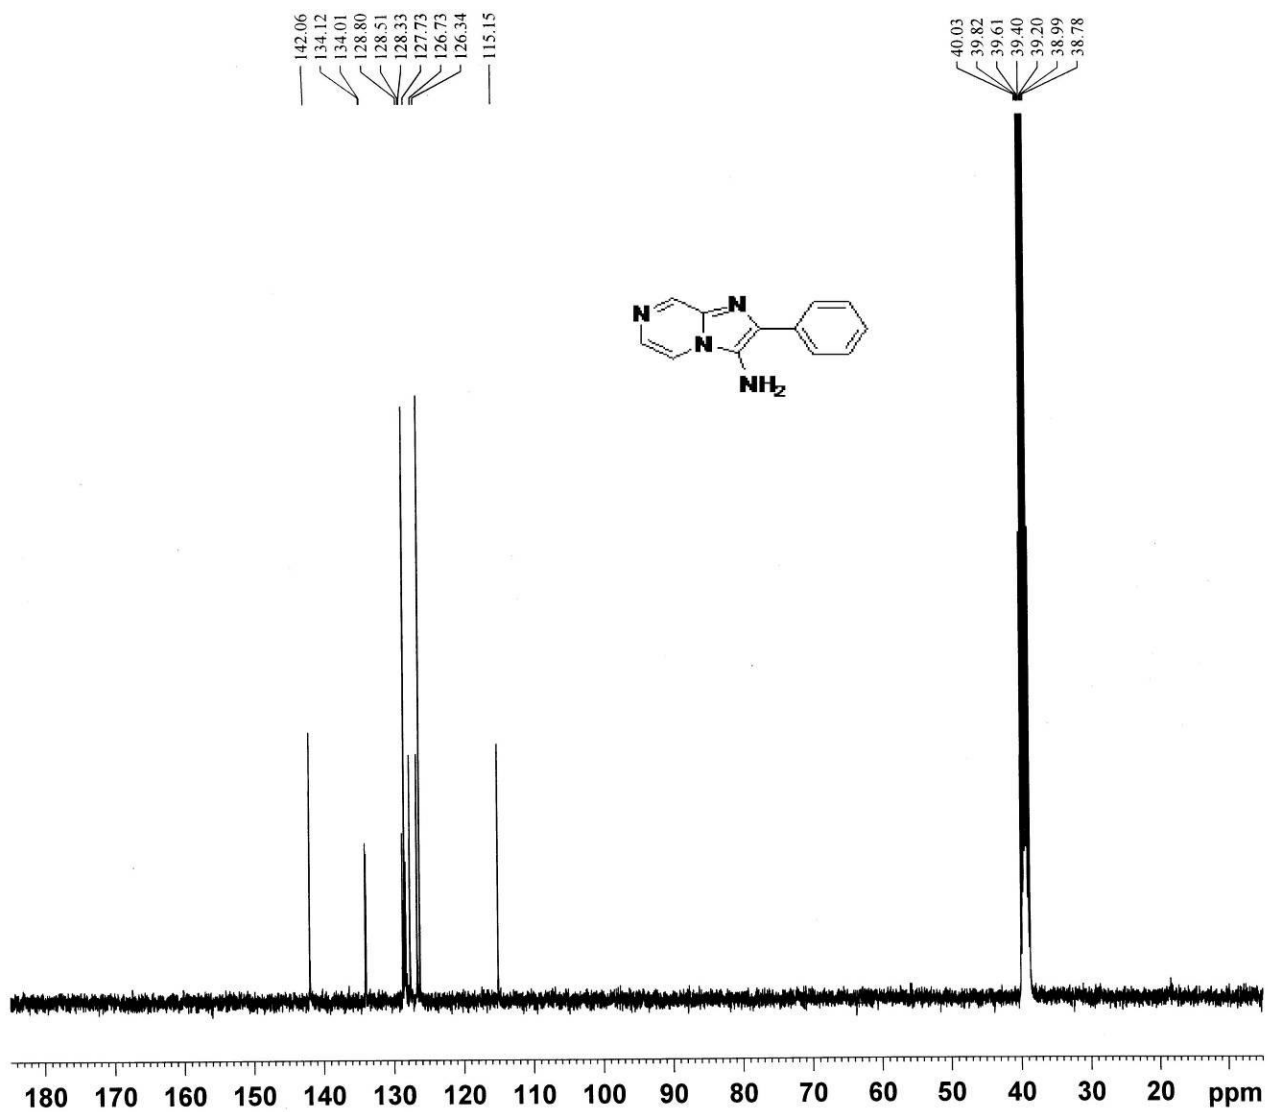

Table 2, entry 8; 4i:  $^1\text{H}$  NMR

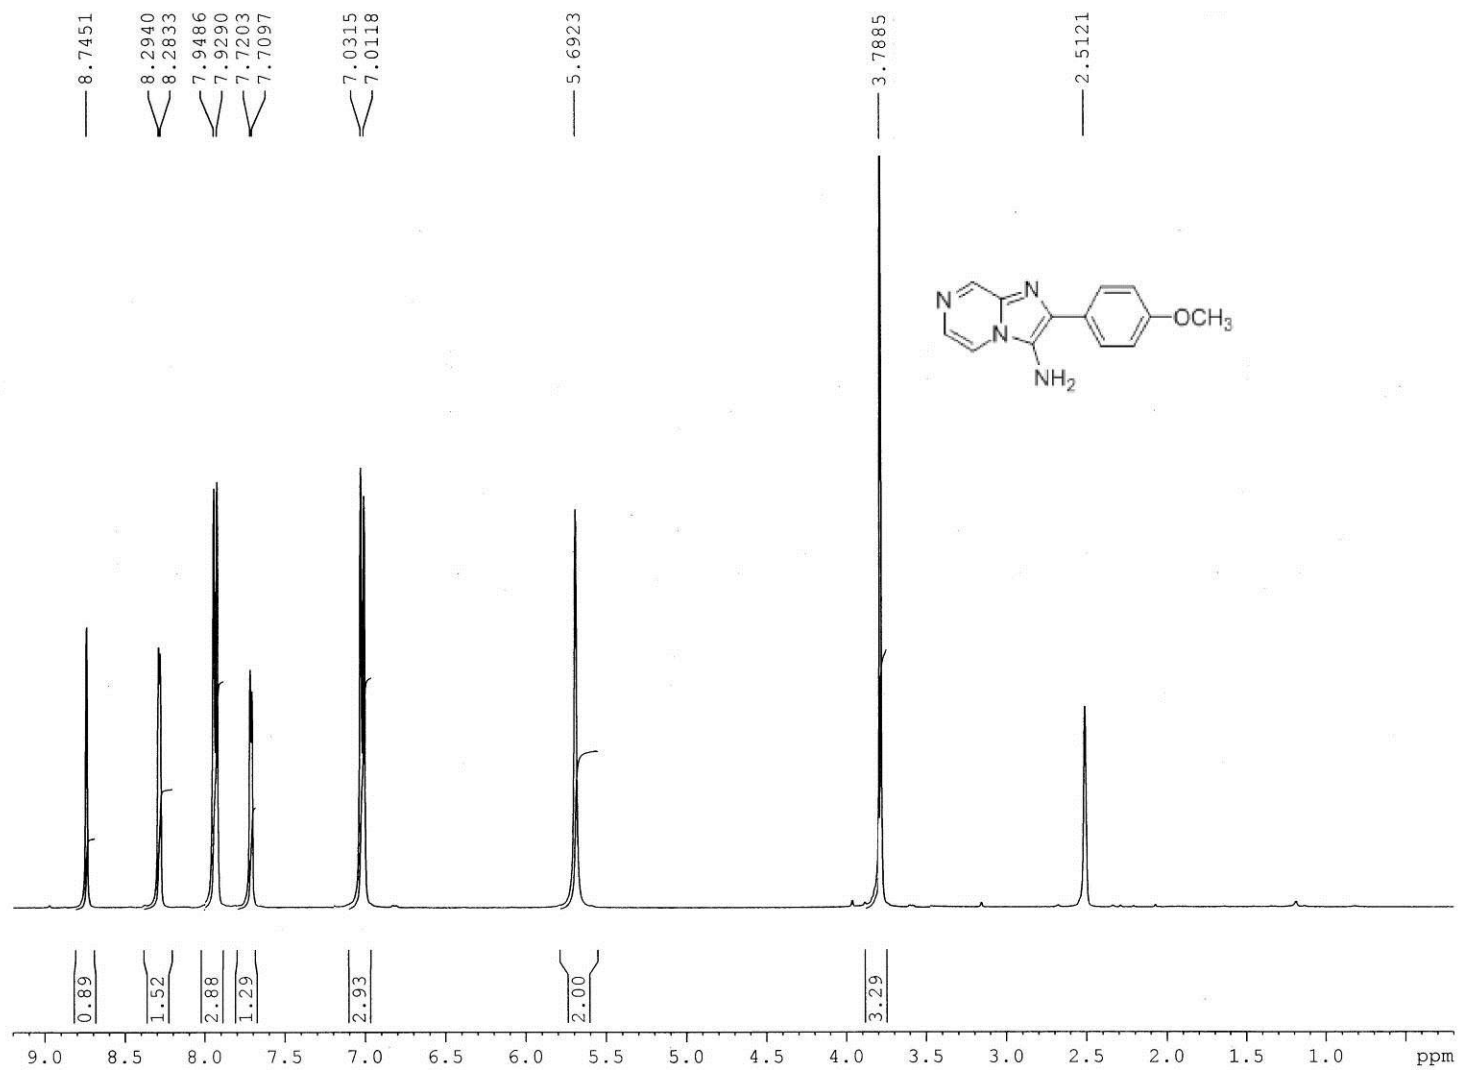

Table 2, entry 8; 4i:  $^{13}\text{C}$  NMR

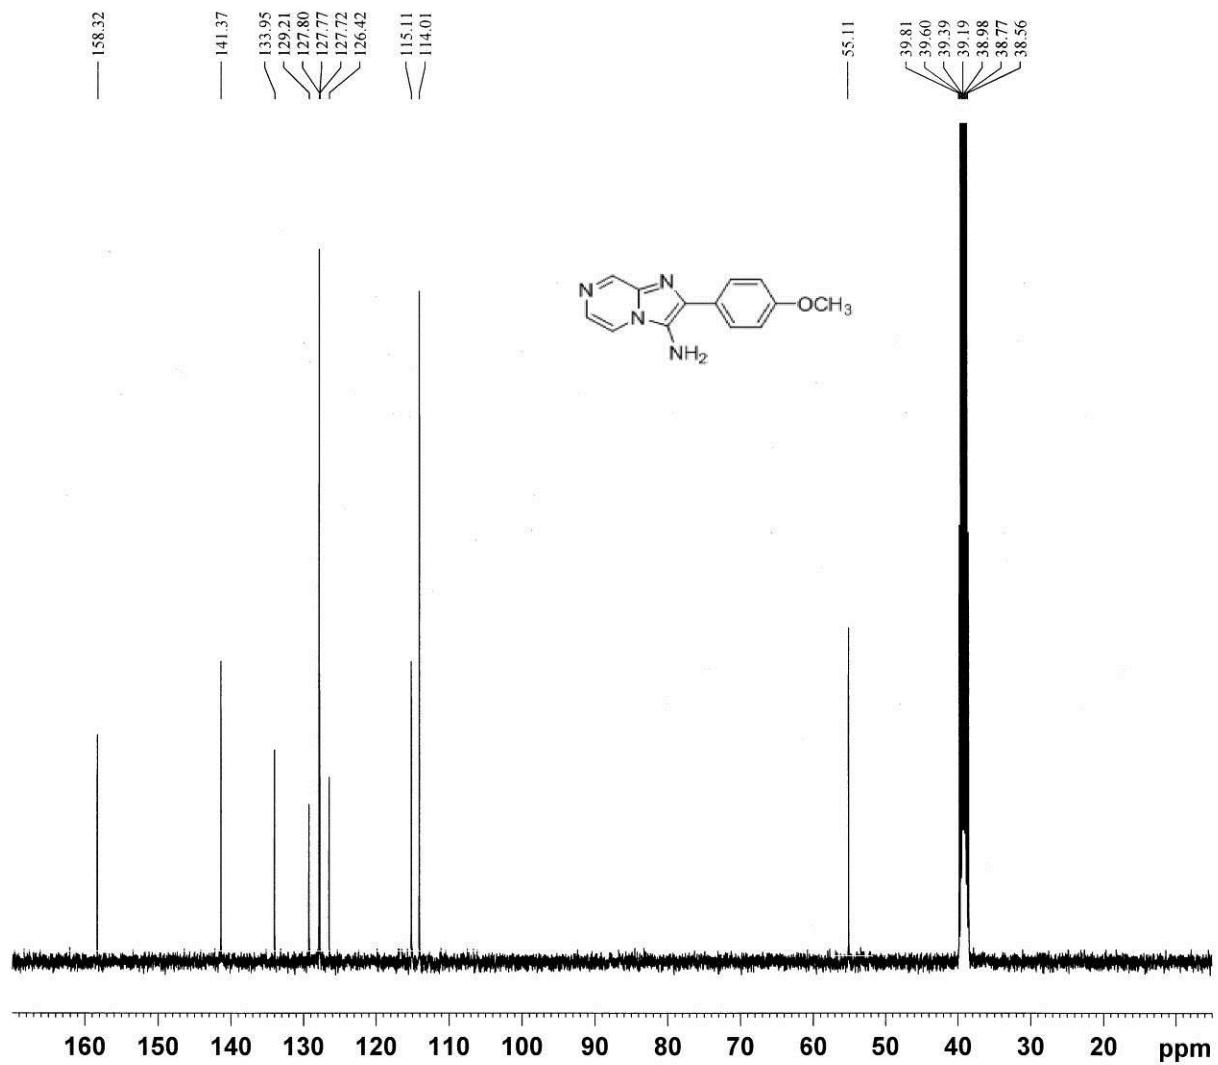

Table 2, entry 9; 4j:  $^1\text{H}$  NMR

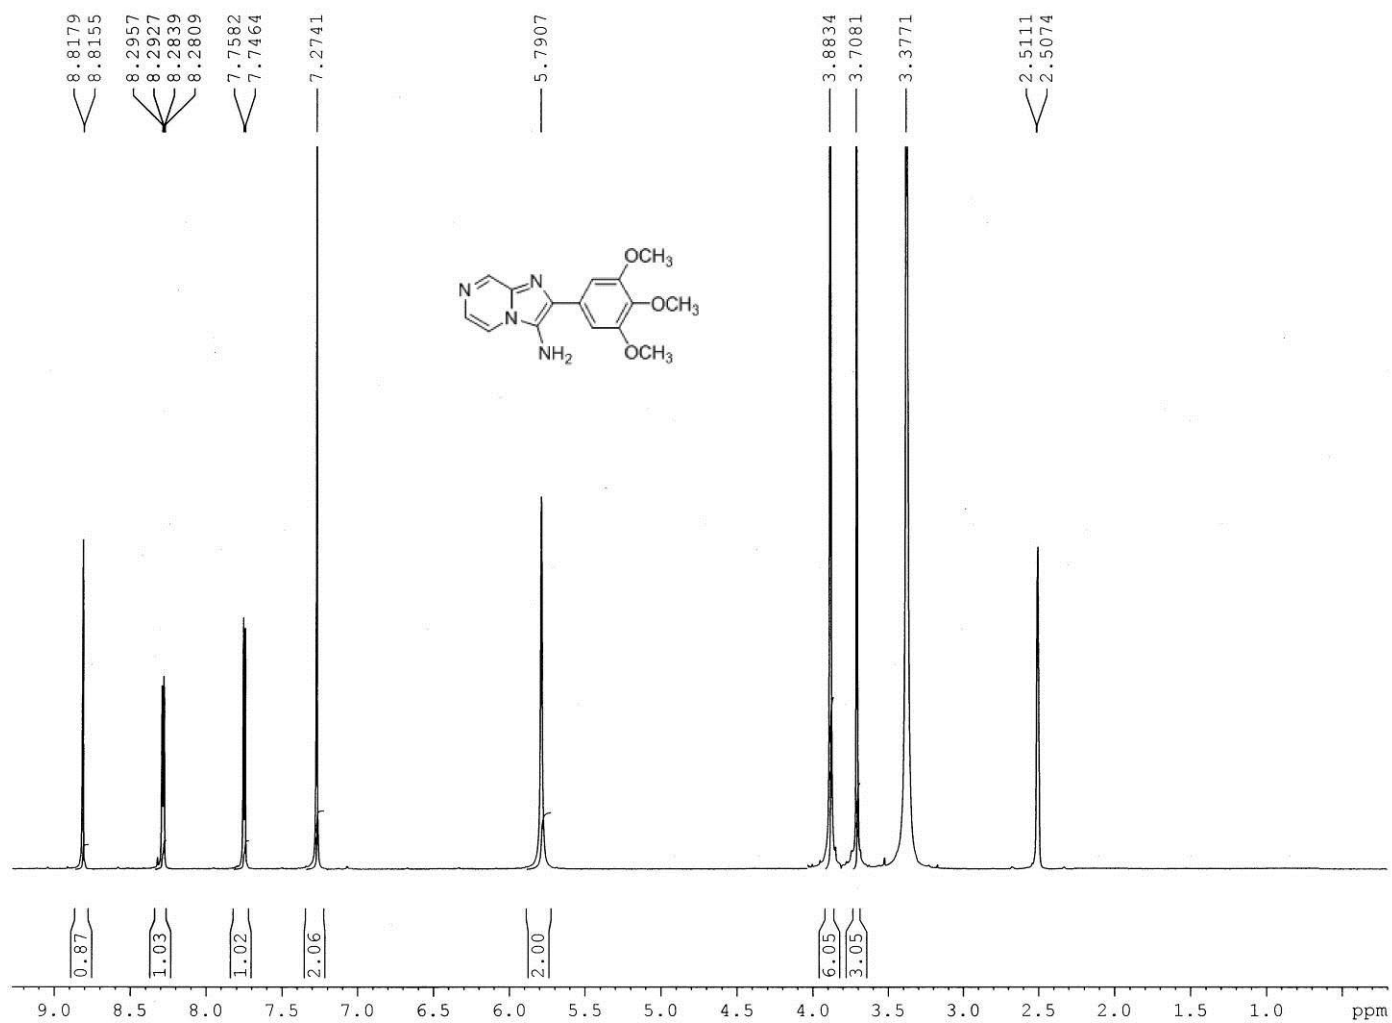

Table 2, entry 9; 4j:  $^{13}\text{C}$  NMR

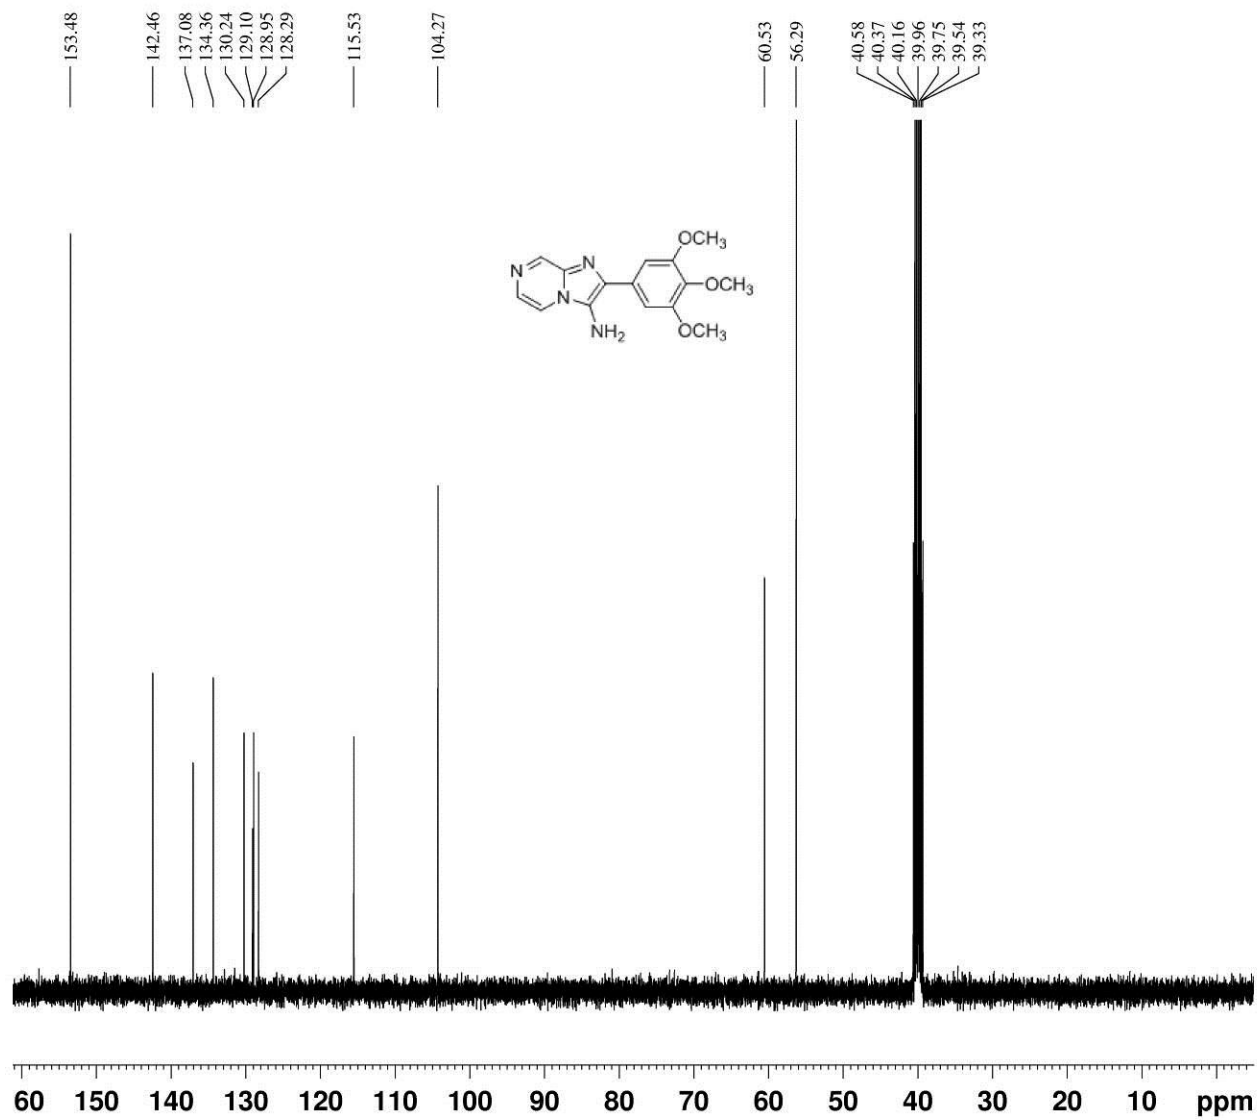

Table 2, entry 10; 4k:  $^1\text{H}$  NMR

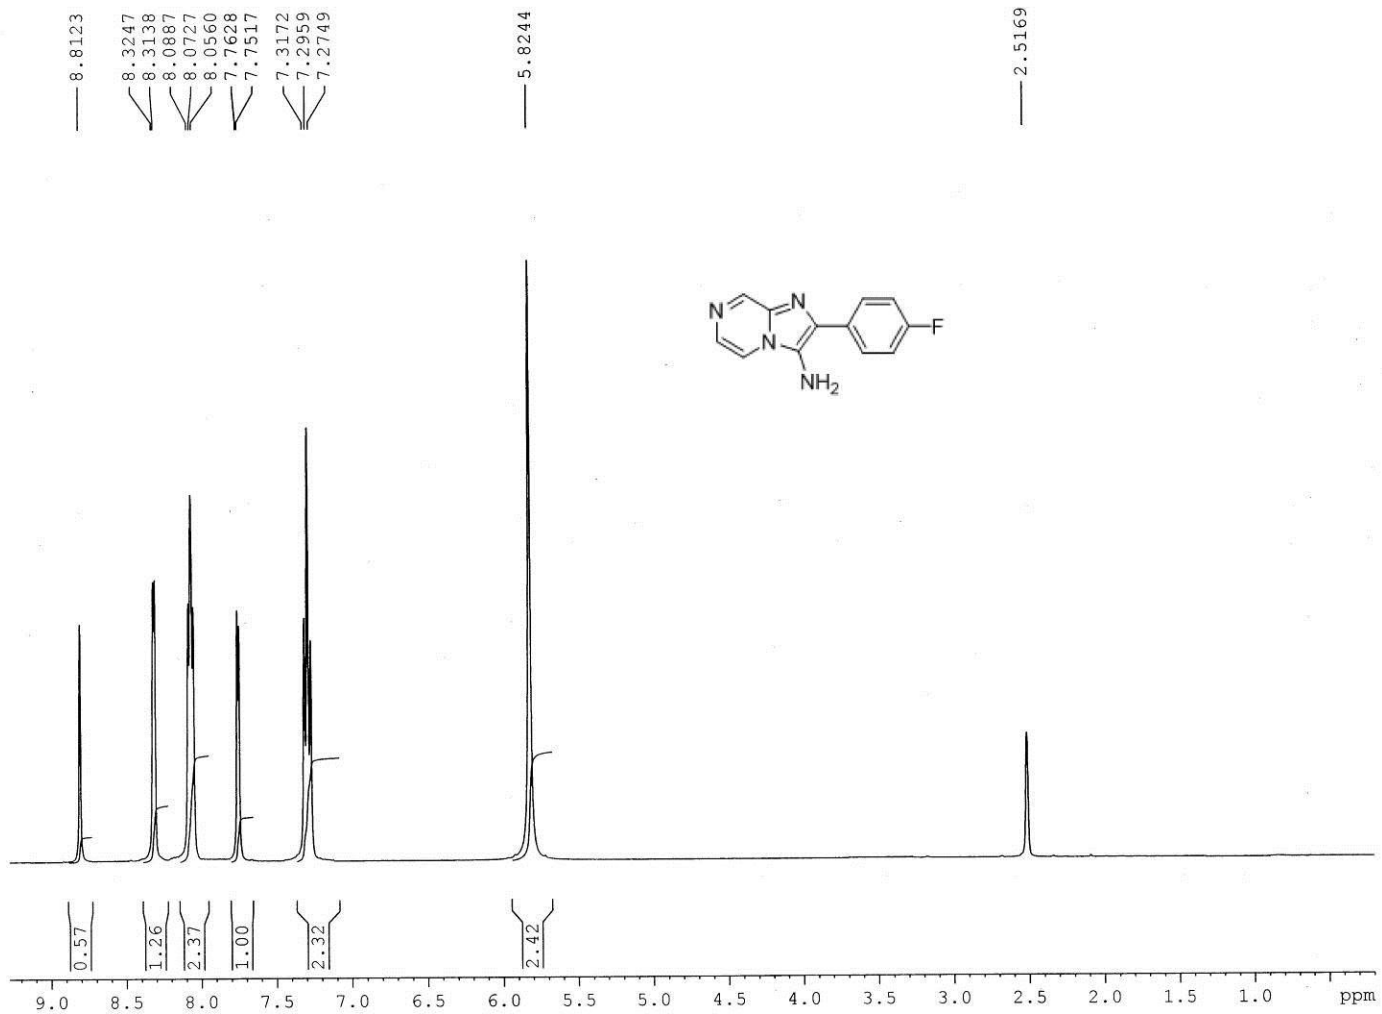



Table 2, entry 10; 4k:  $^{13}\text{C}$  NMR

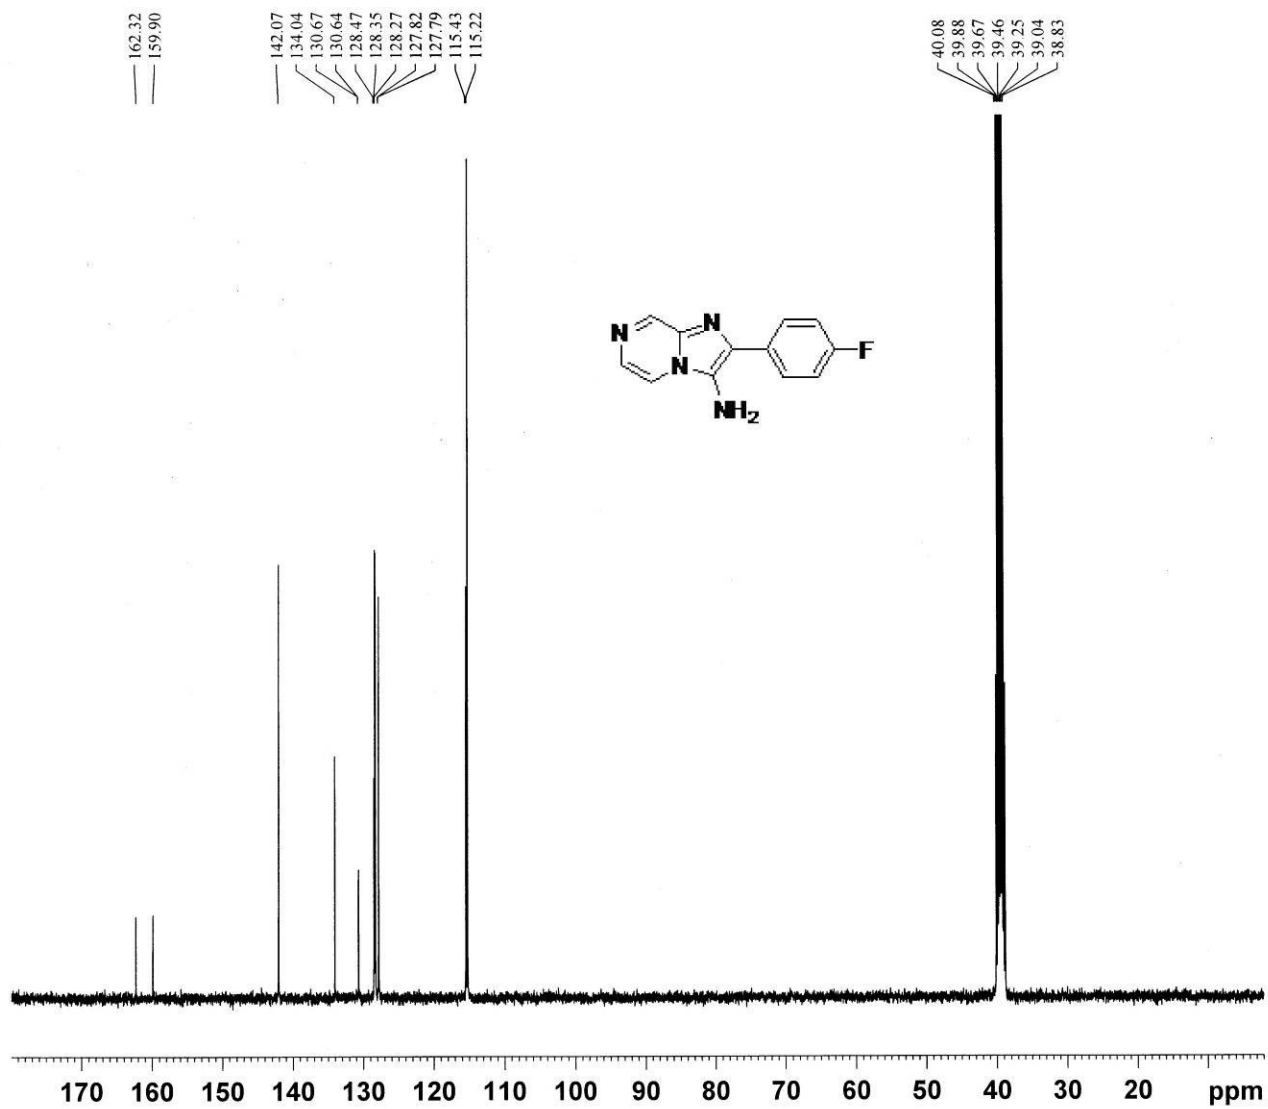

Table 2, entry 11; 4l:  $^1\text{H}$  NMR

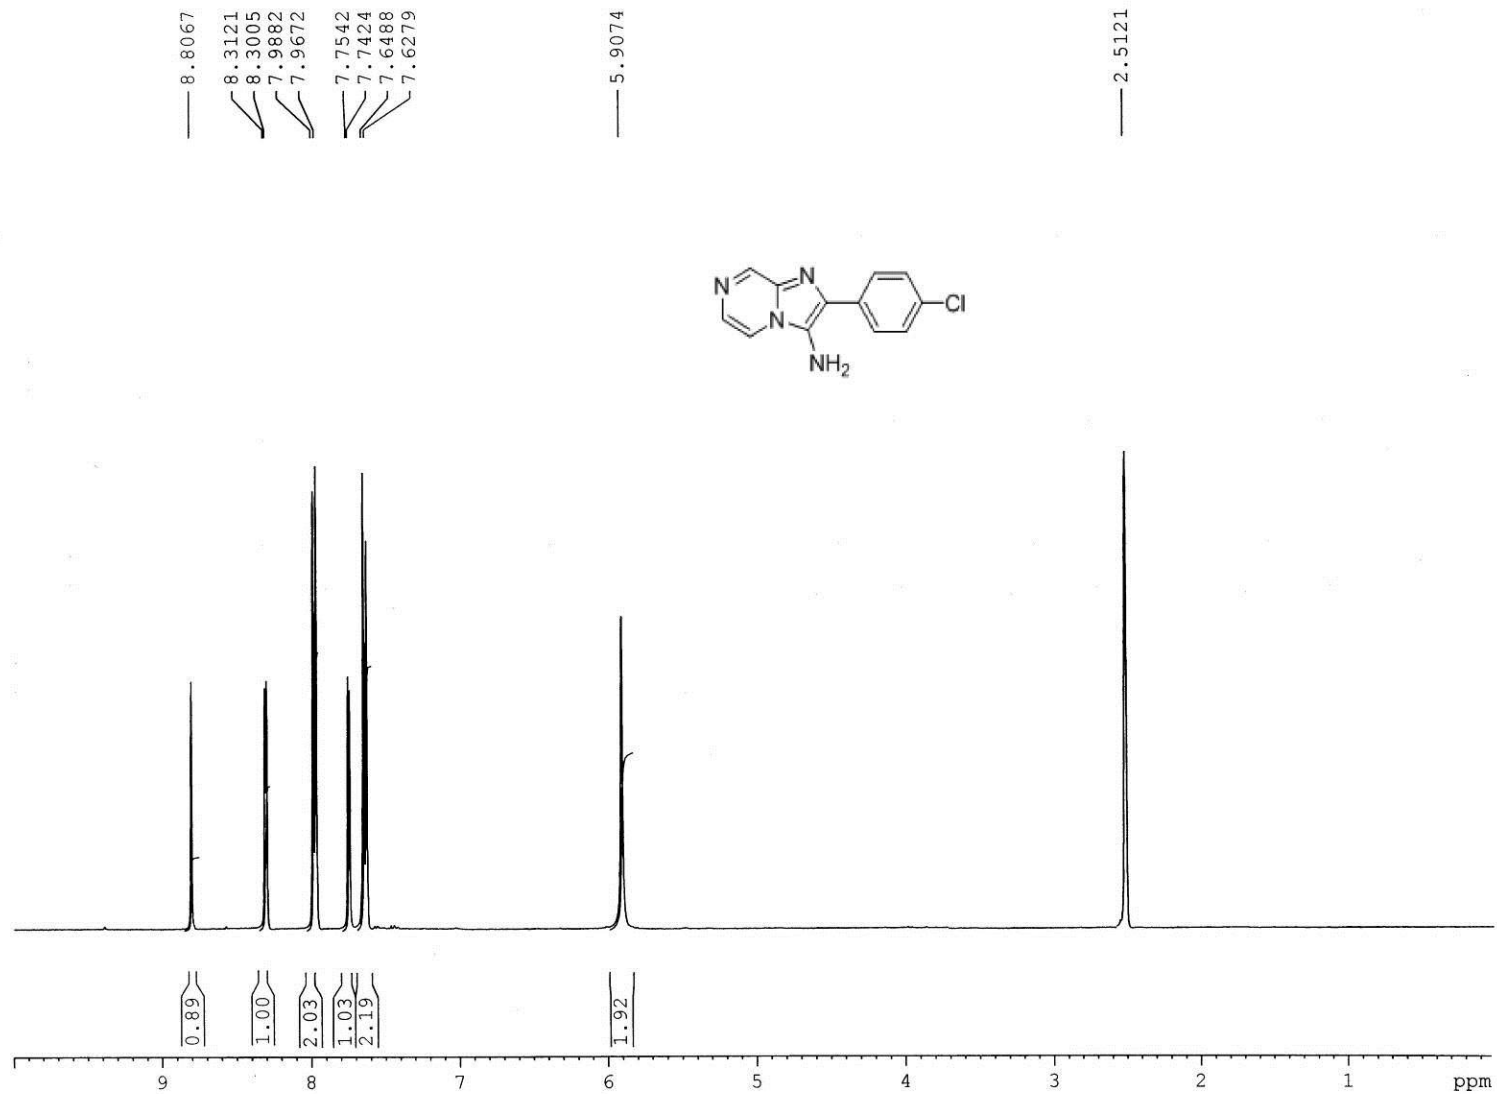

Table 2, entry 11; 4l:  $^{13}\text{C}$  NMR

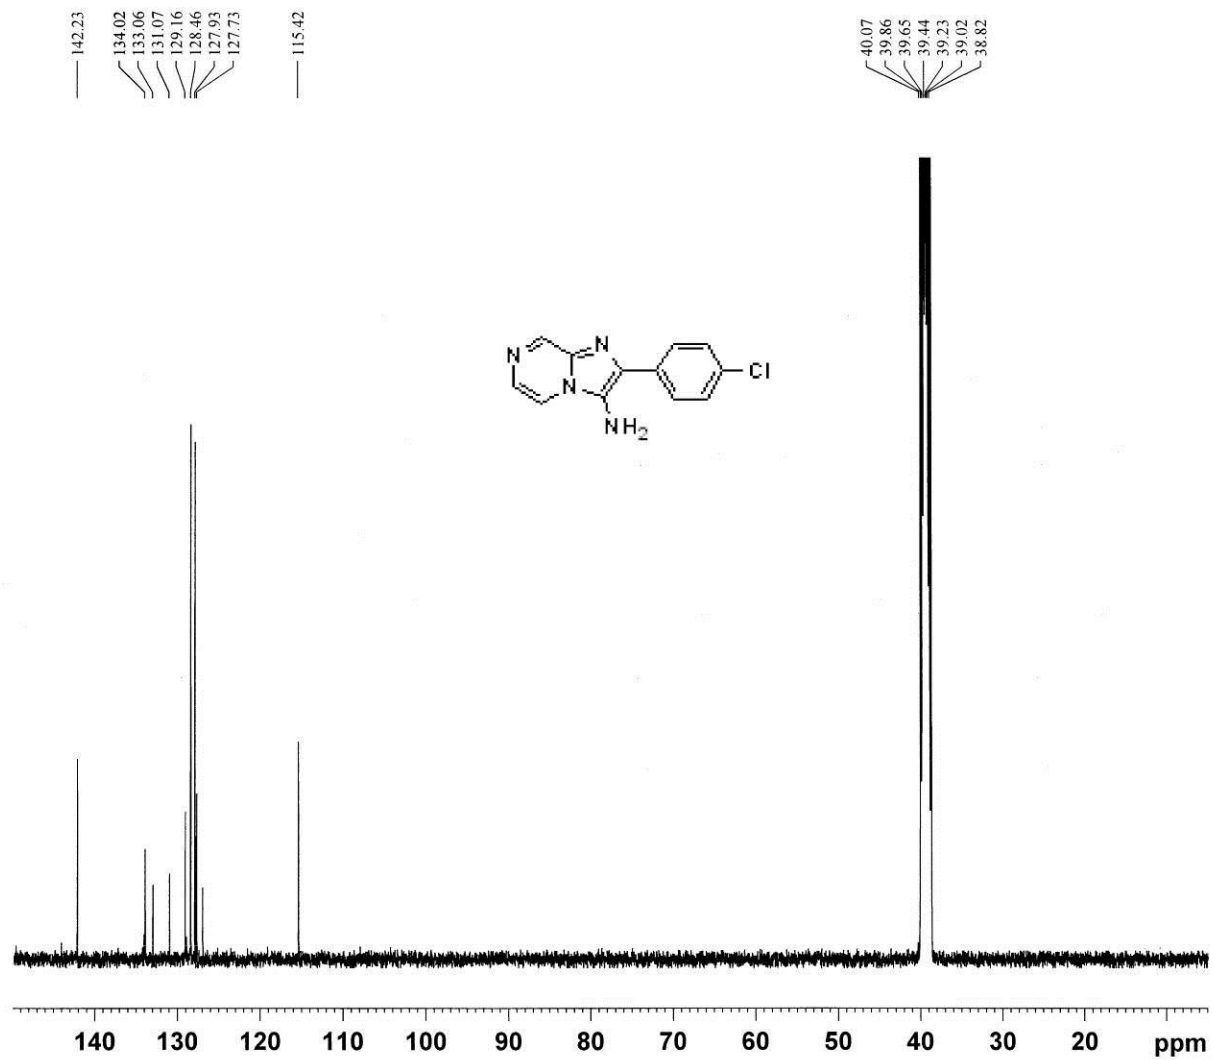

Table 2, entry 12; 4m:  $^1\text{H}$  NMR

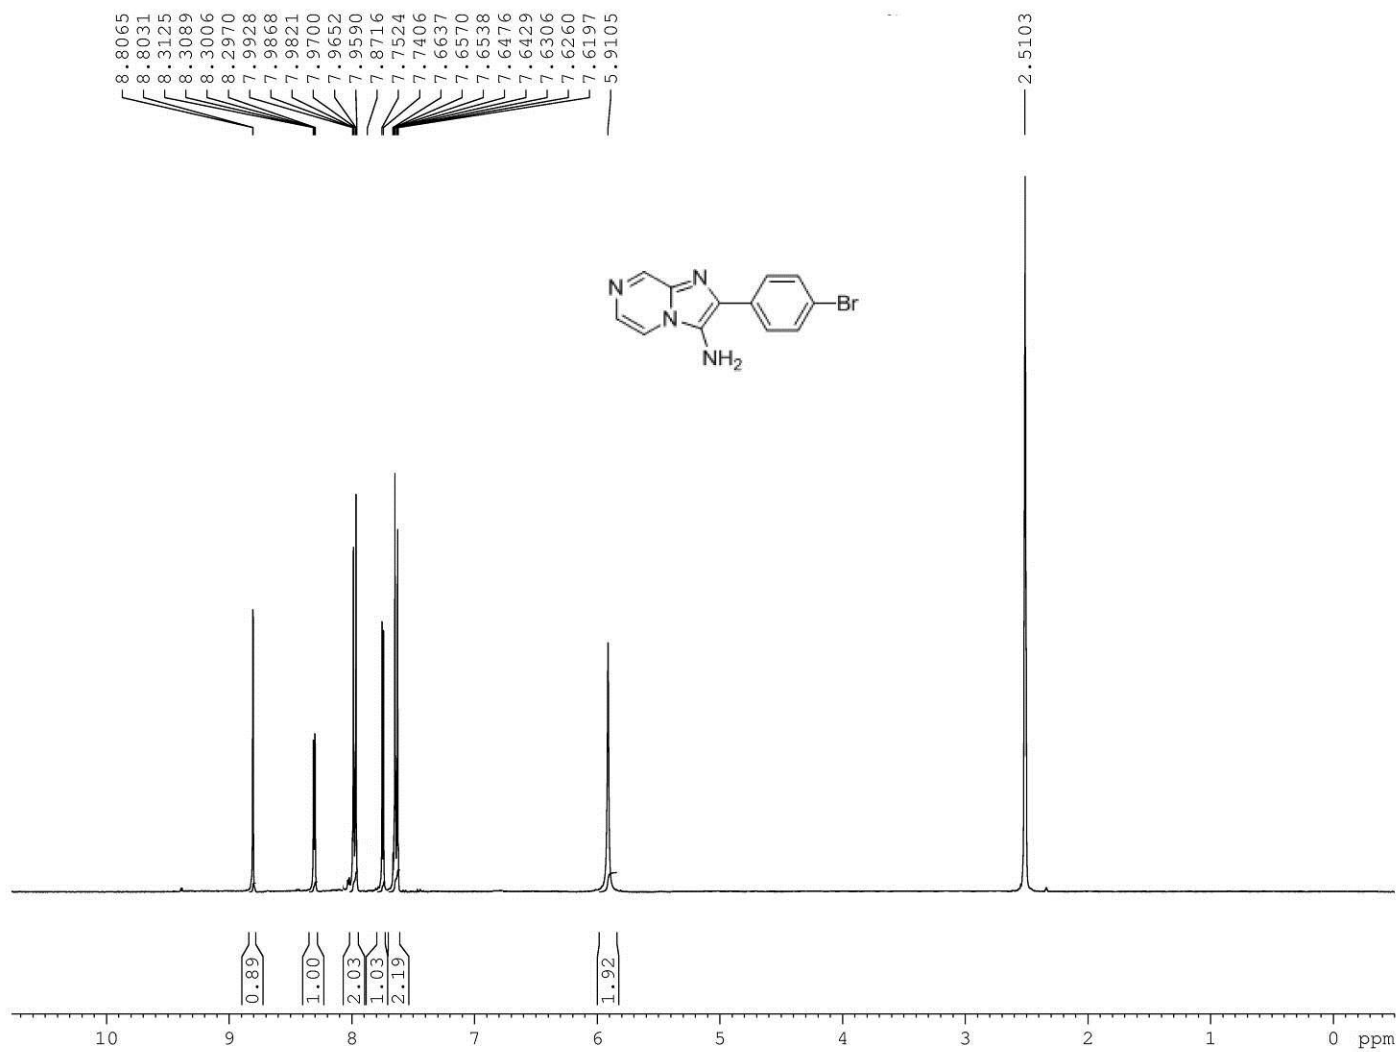

Table 2, entry 12; 4m:  $^{13}\text{C}$  NMR

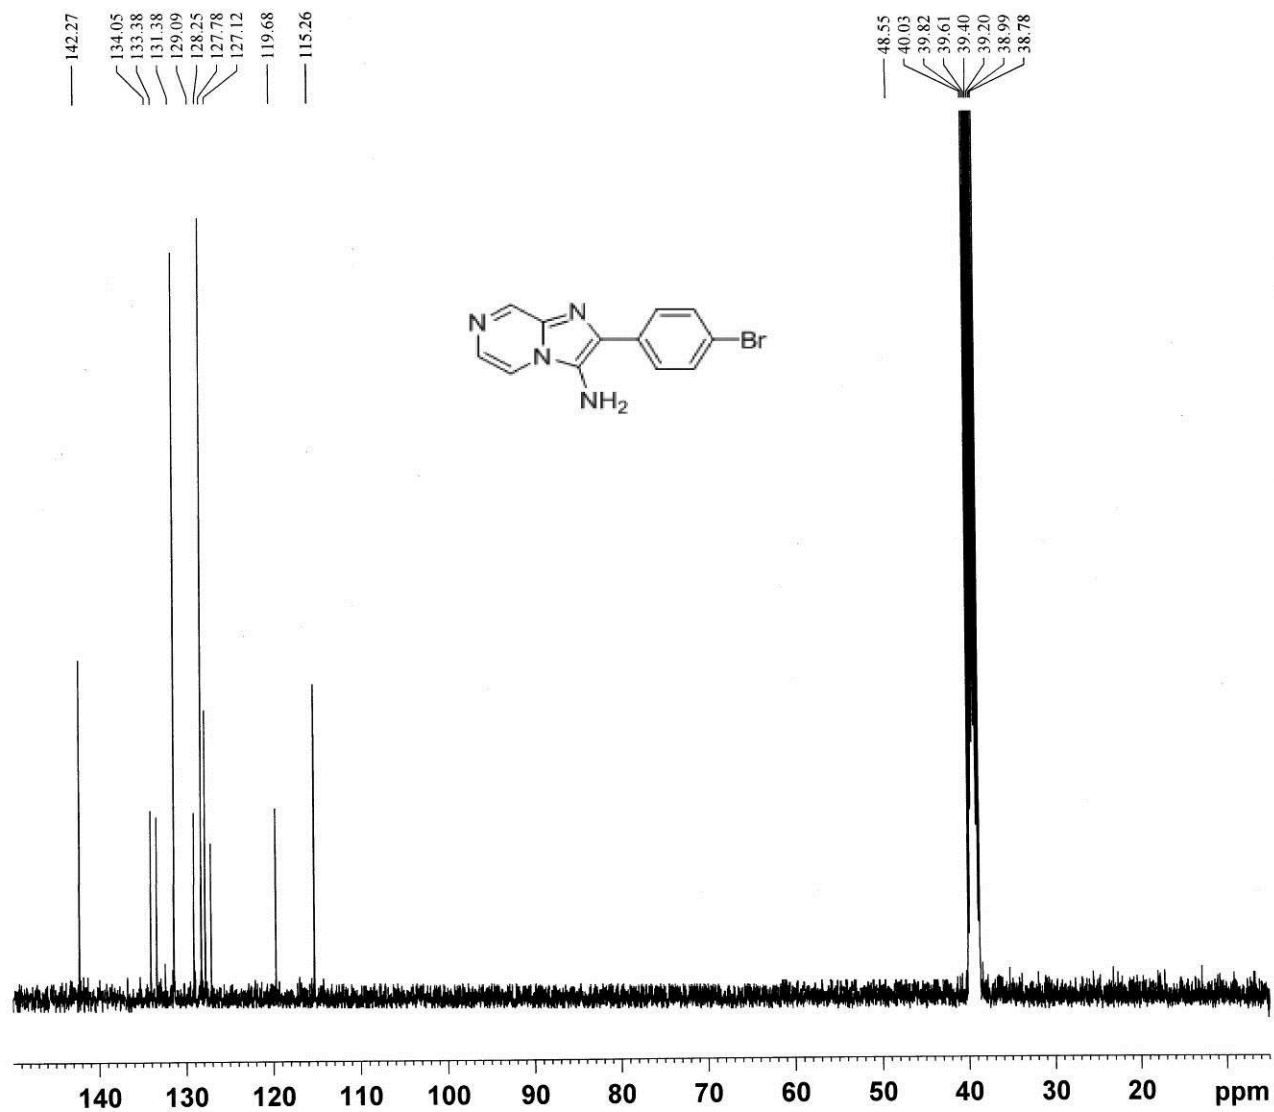

Table 2, entry 13; 4n:  $^1\text{H}$  NMR

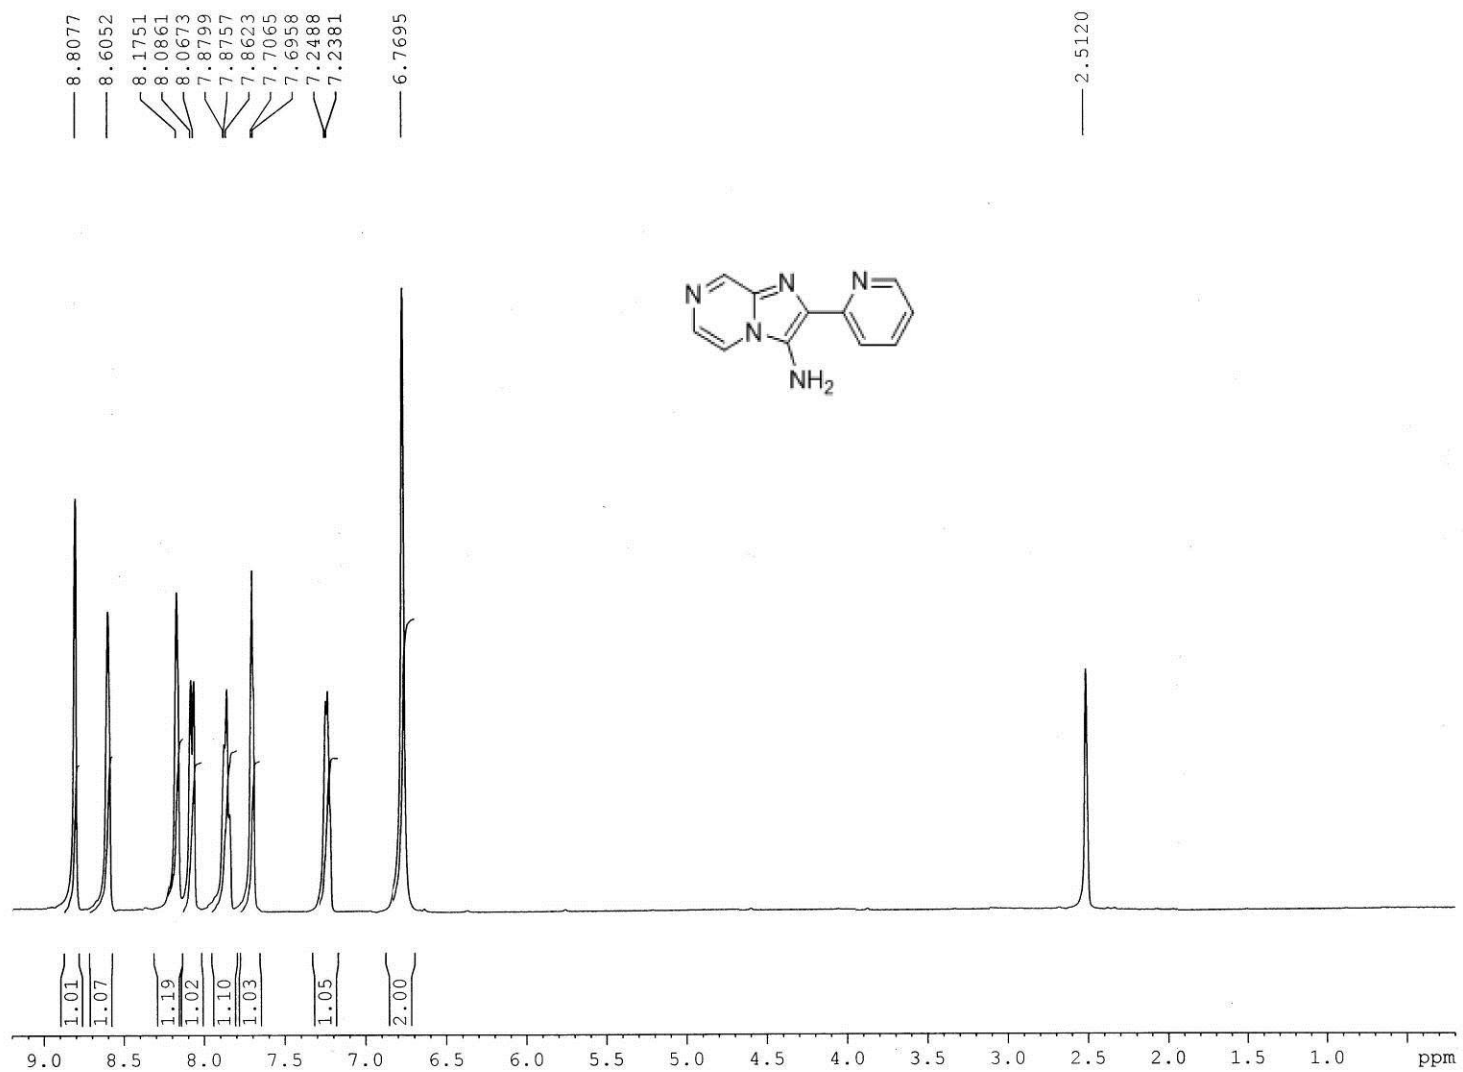

Table 2, entry 13; 4n:  $^{13}\text{C}$  NMR

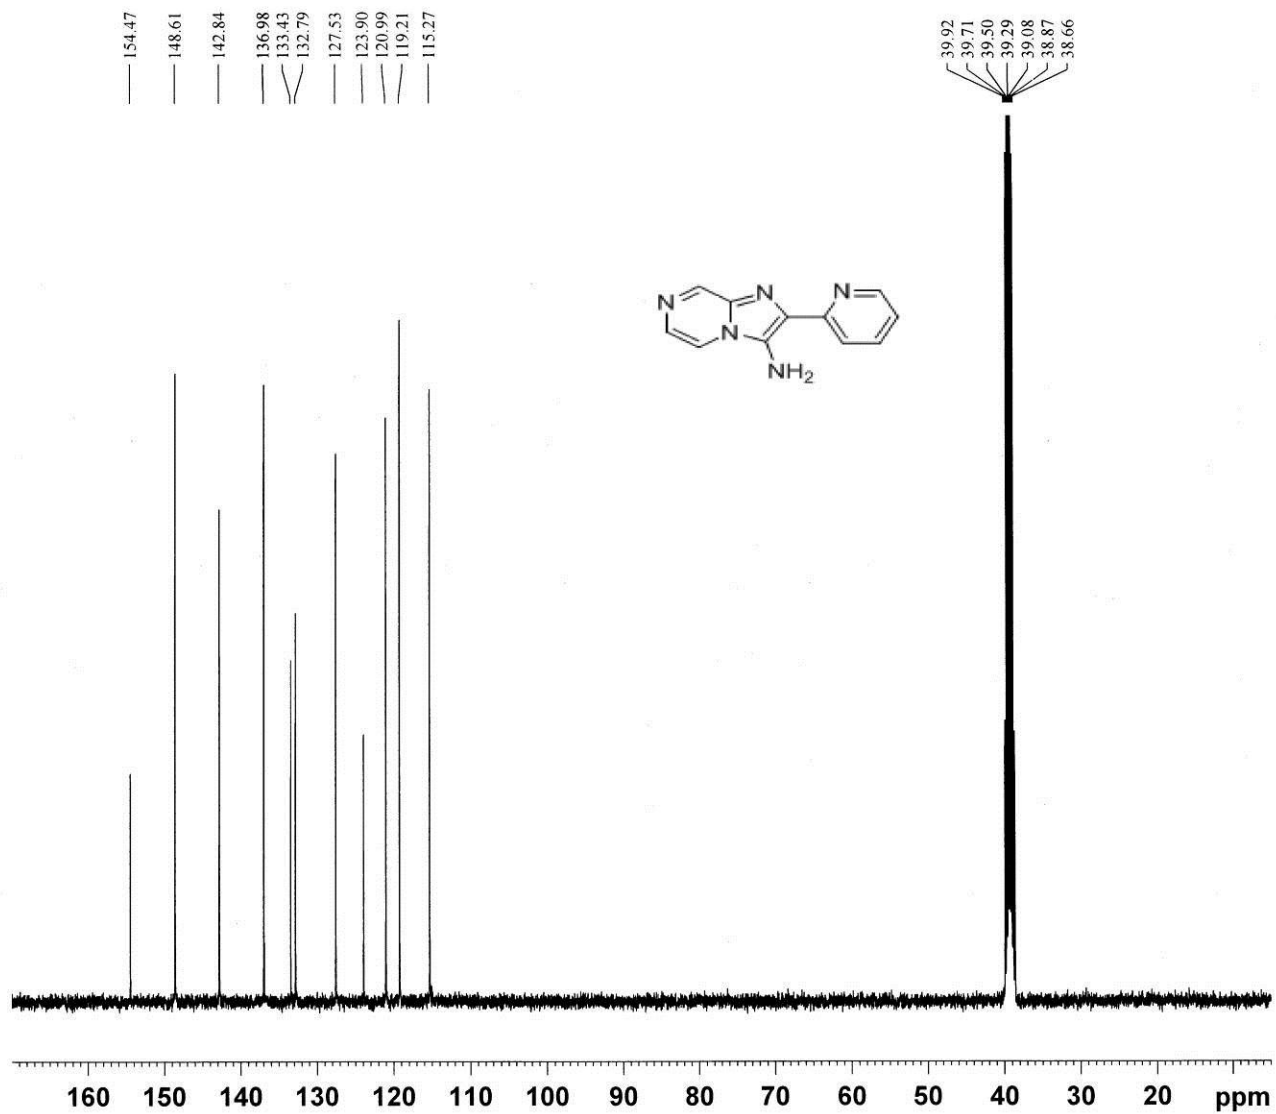

Table 2, entry 14; 4o:  $^1\text{H}$  NMR

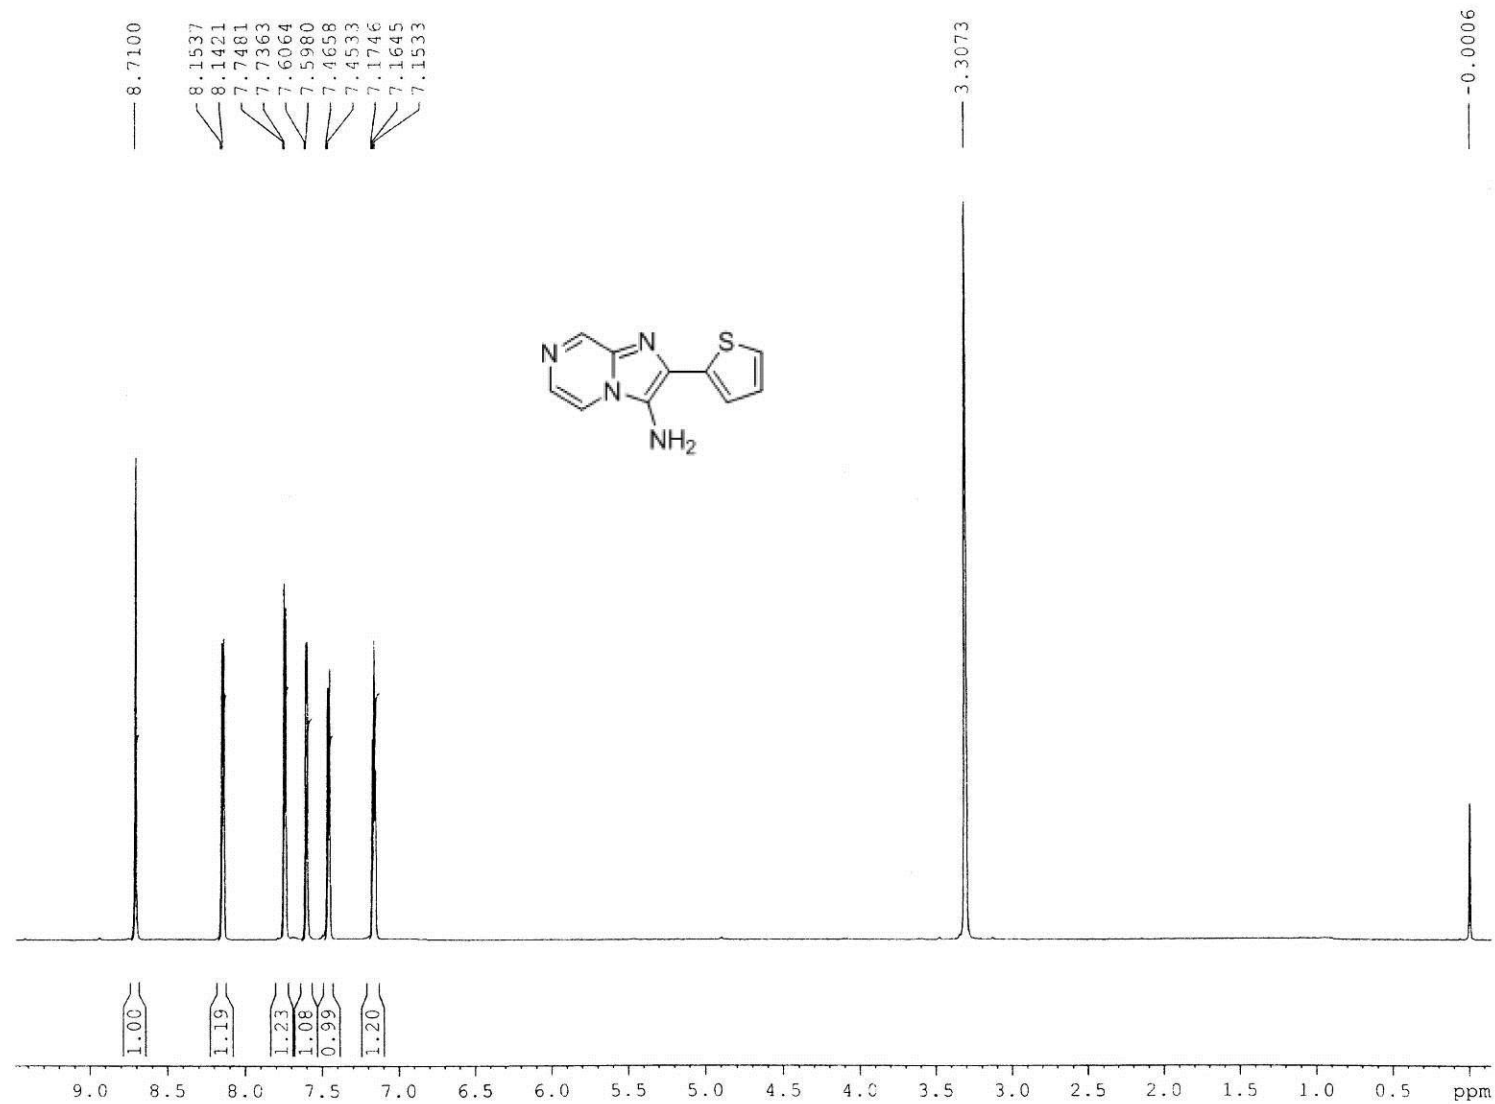



Table 2, entry 14; 4o:  $^{13}\text{C}$  NMR

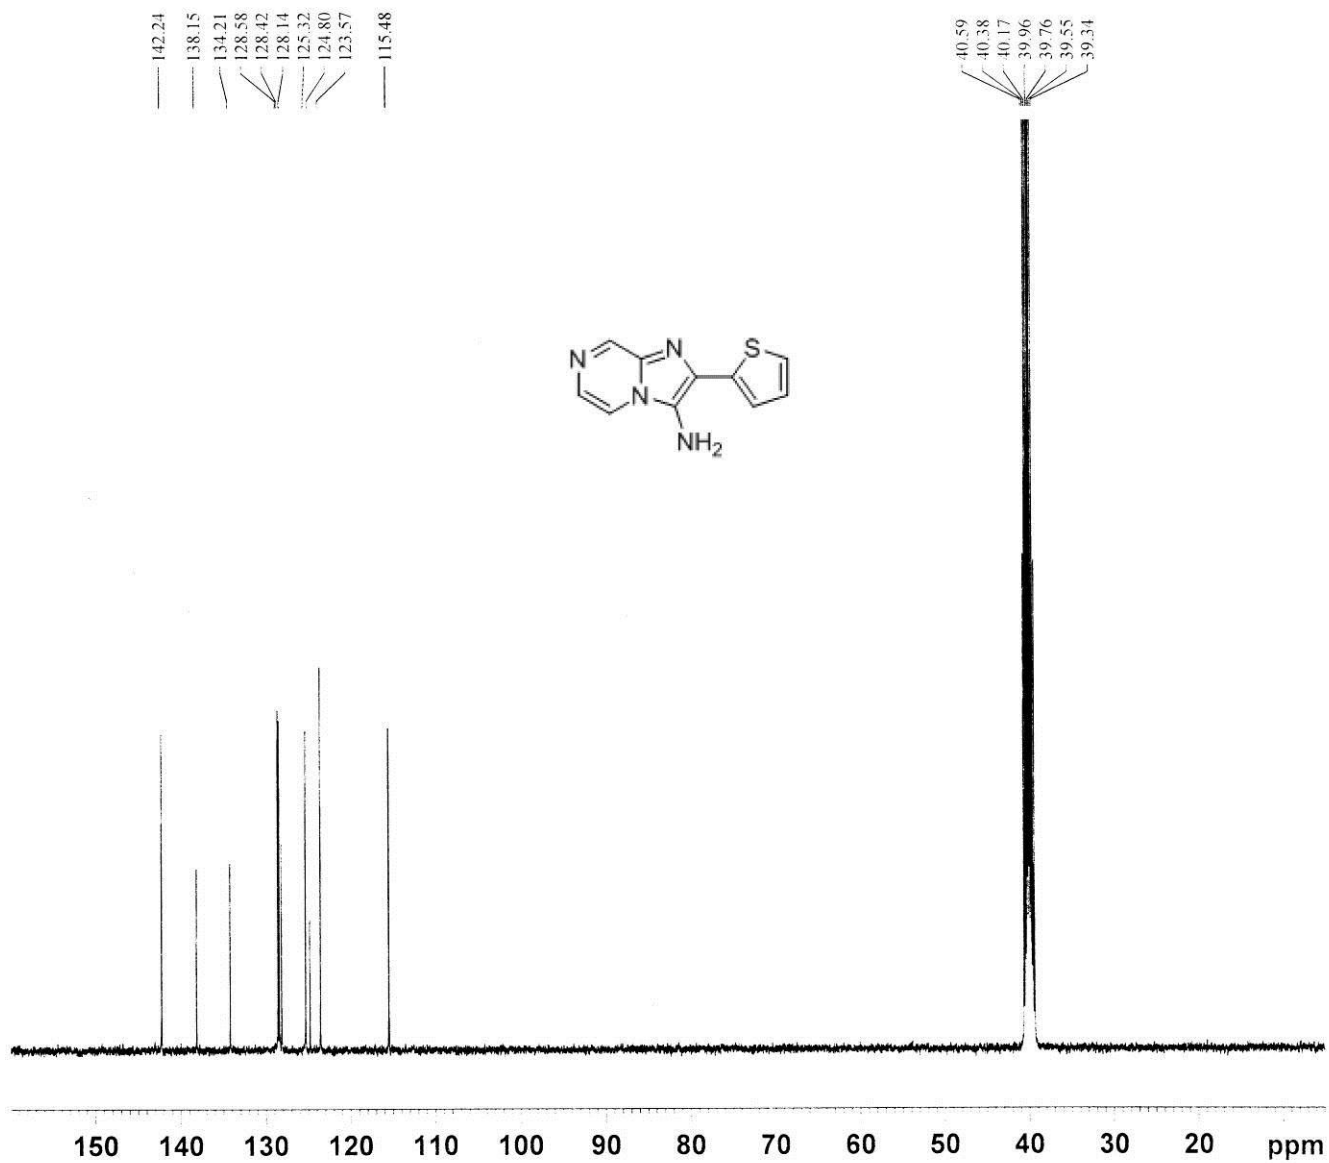

Table 2, entry 15; 4p:  $^1\text{H}$  NMR

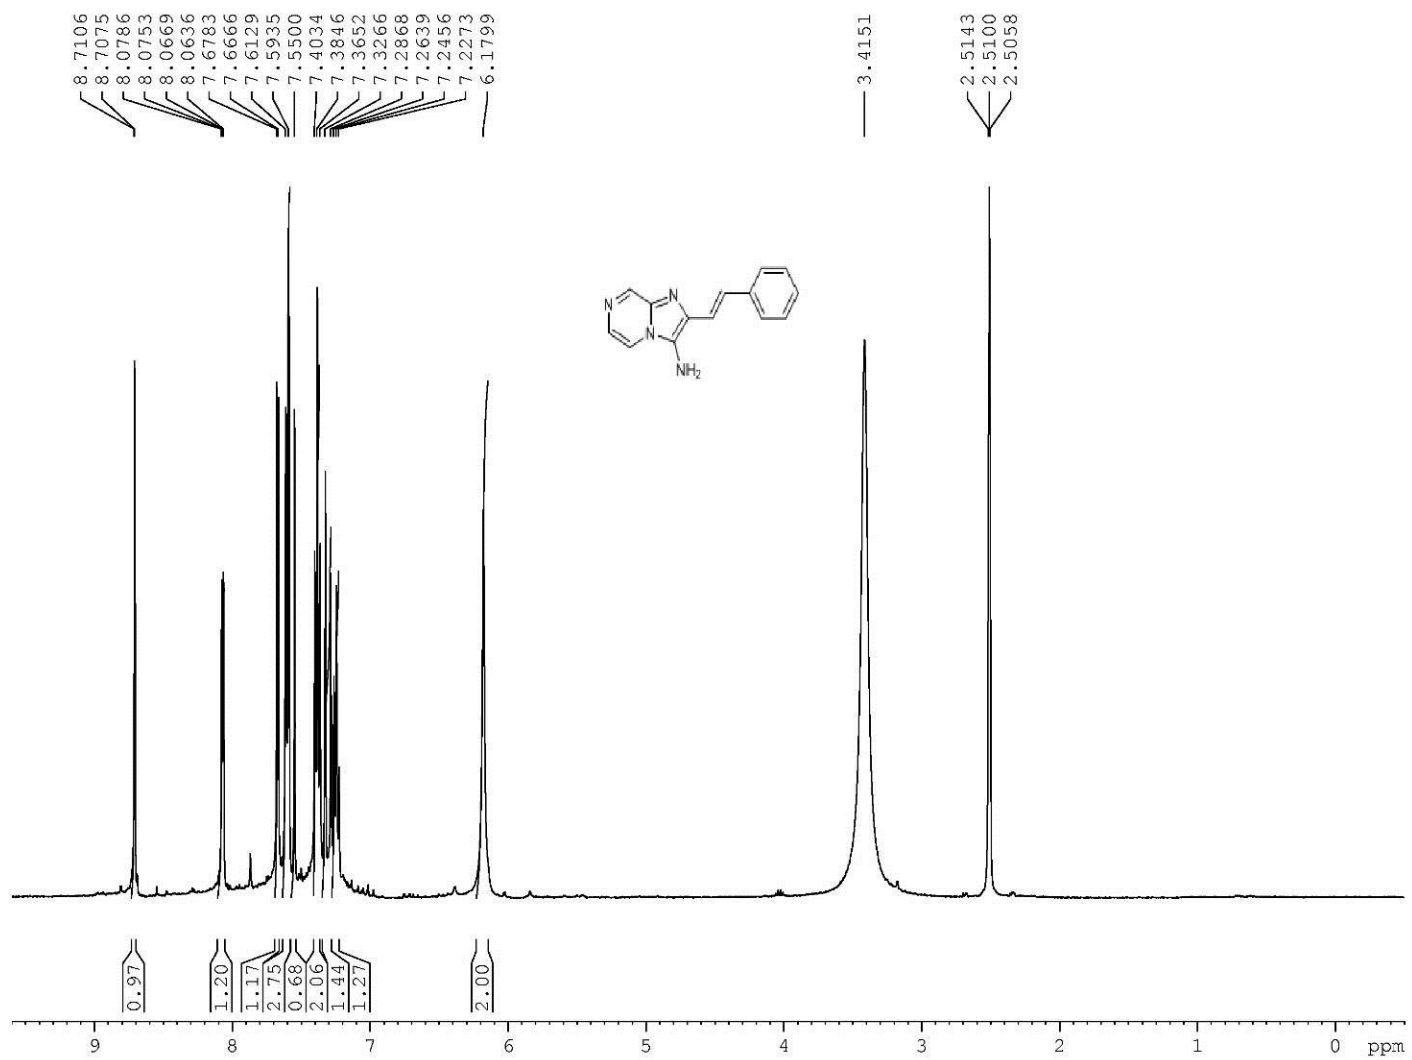

Table 2, entry 15; 4p:  $^{13}\text{C}$  NMR

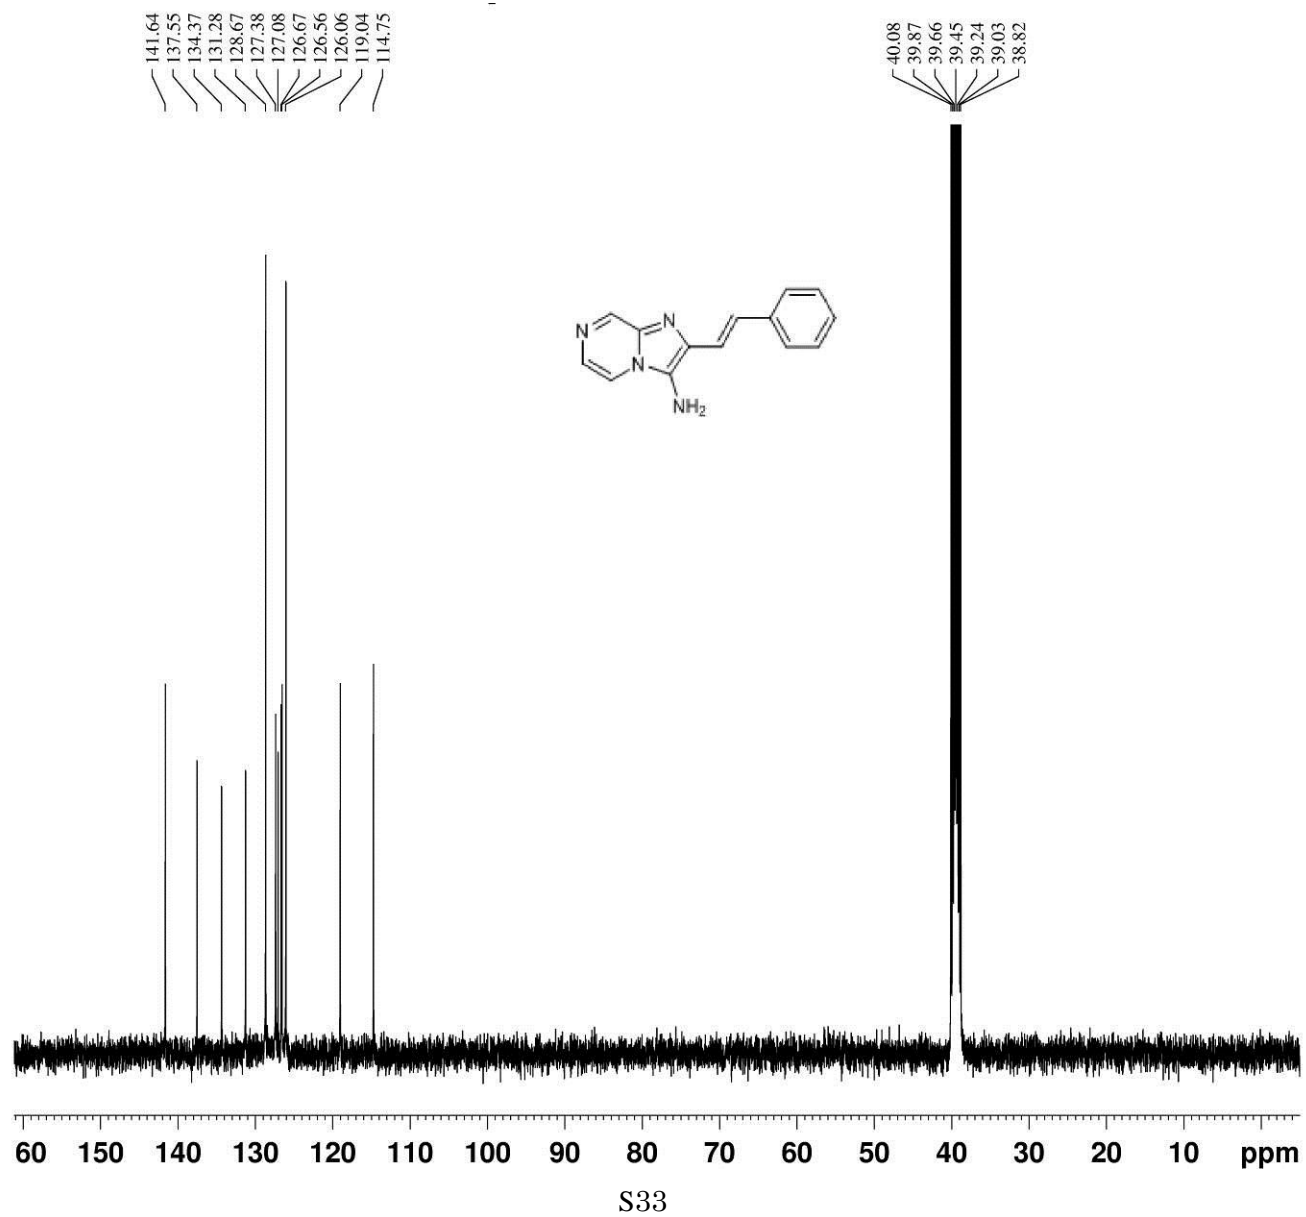

Table 2, entry 16; 4q:  $^1\text{H}$  NMR

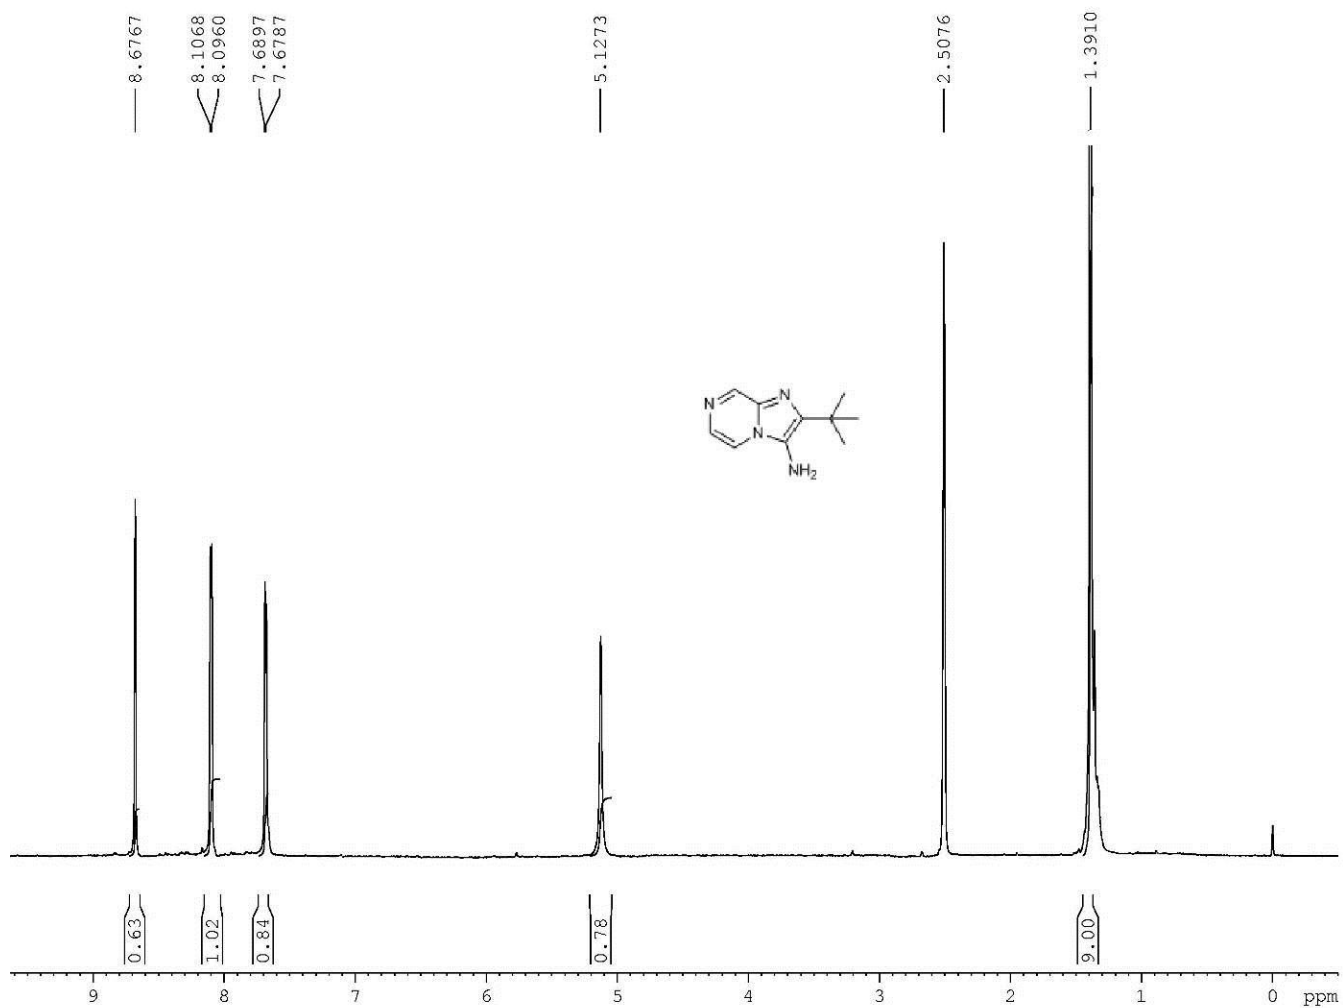

Table 2, entry 16; 4q:  $^{13}\text{C}$  NMR

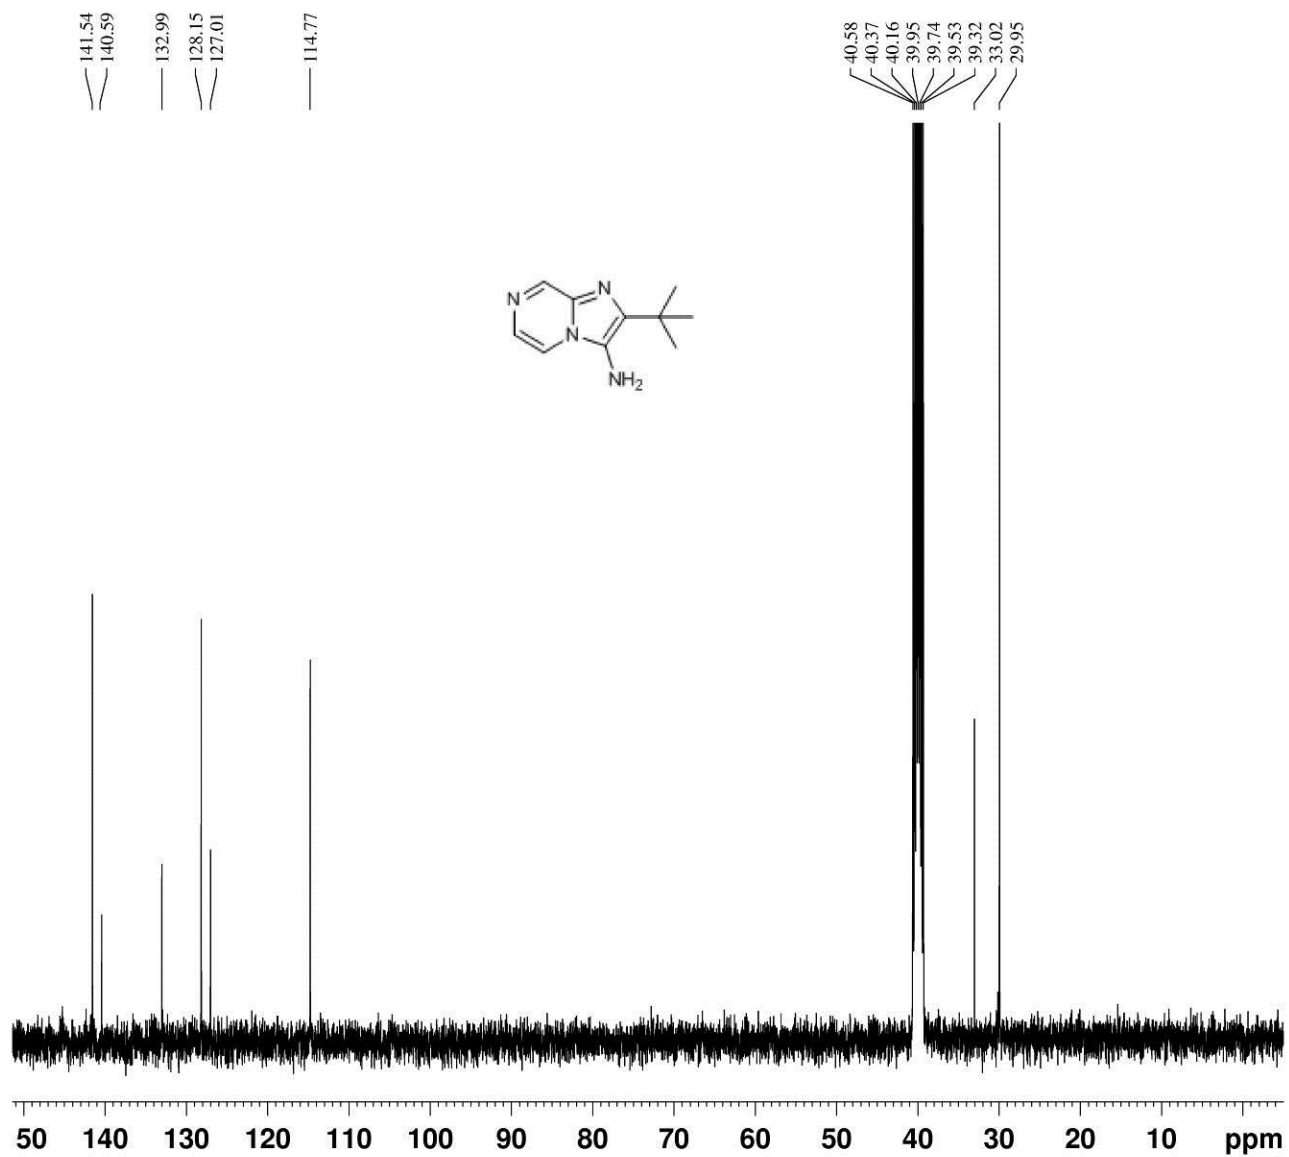

Table 2, entry 17; 4r:  $^1\text{H}$  NMR

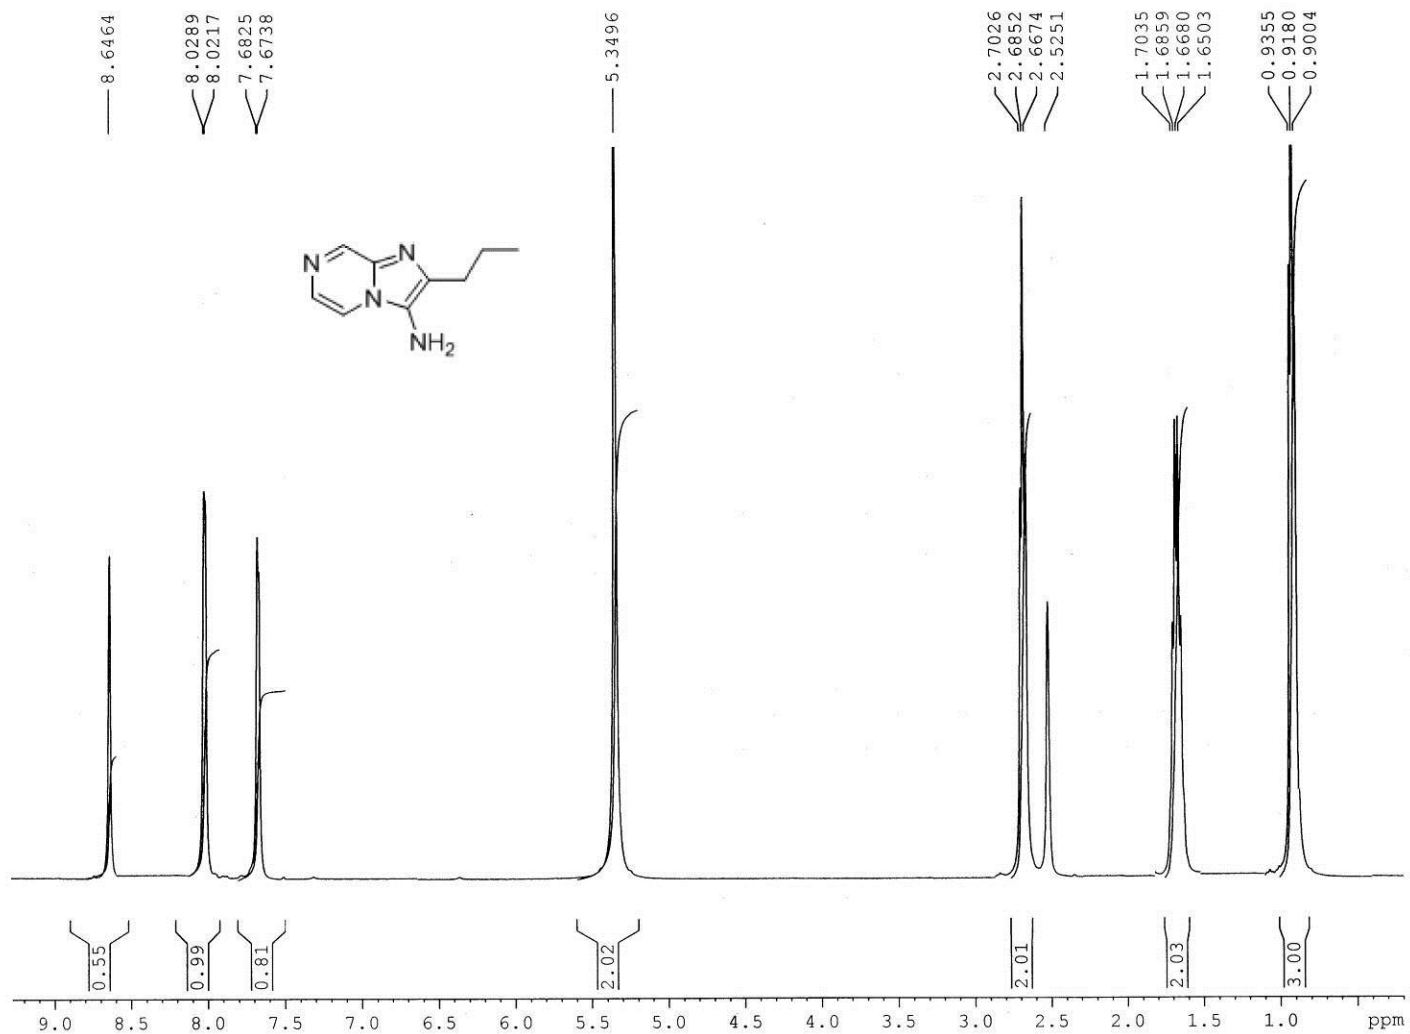

Table 2, entry 17; 4r:  $^{13}\text{C}$  NMR

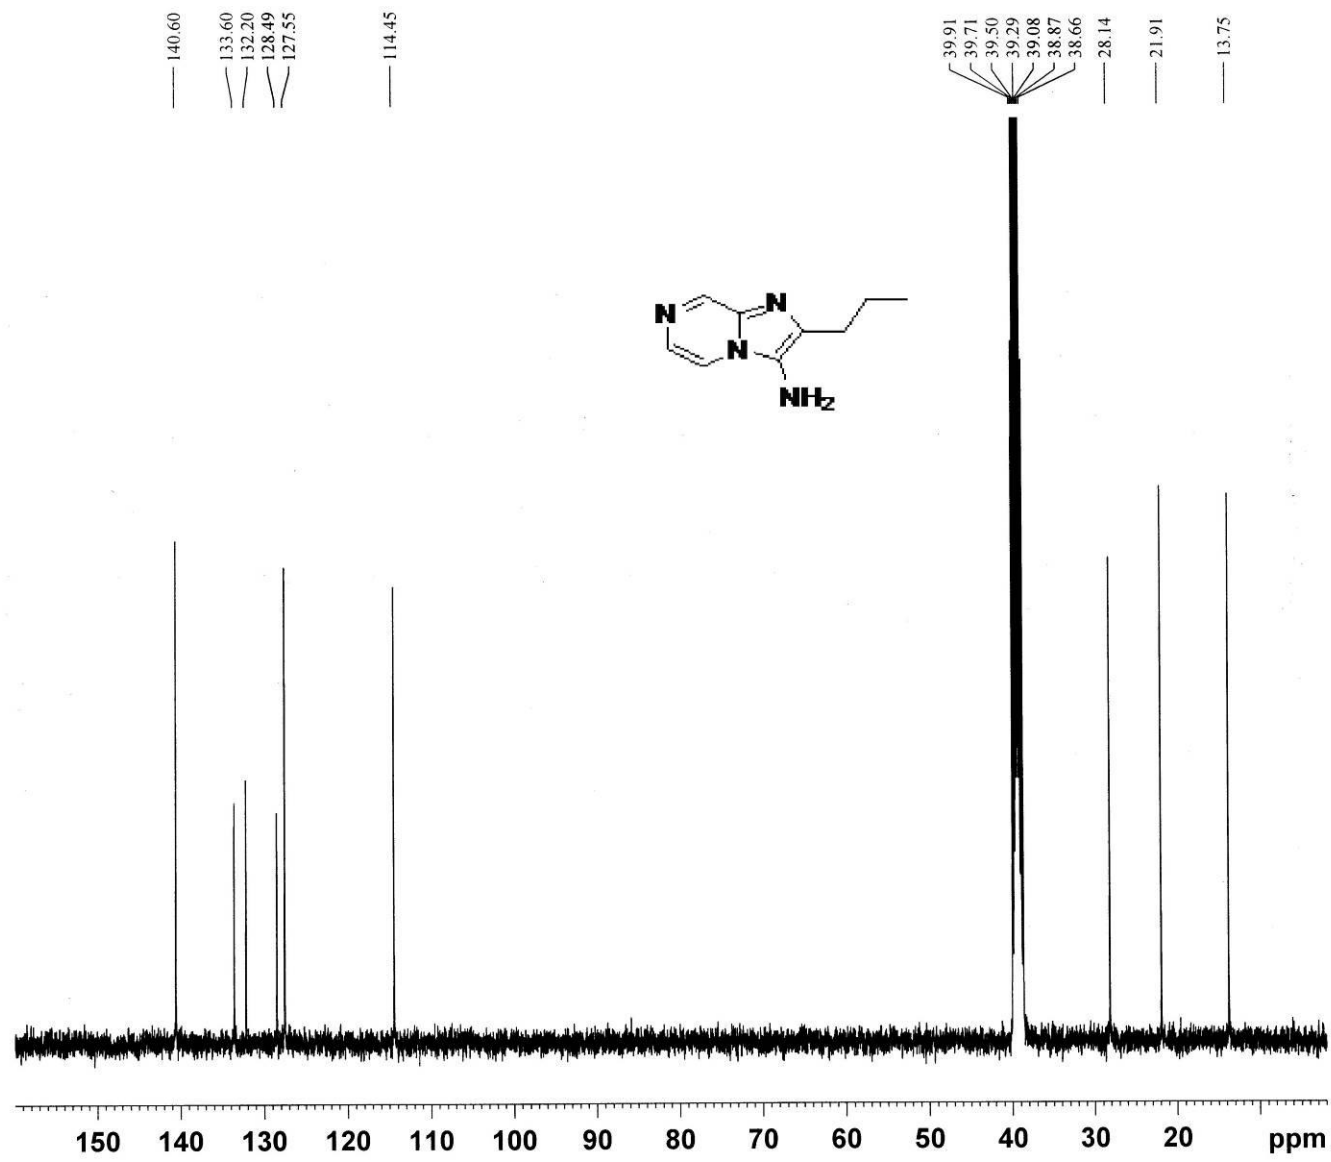

### Spectra of compounds (7a-f)

Table 3, entry 1; 7a:  $^1\text{H}$  NMR

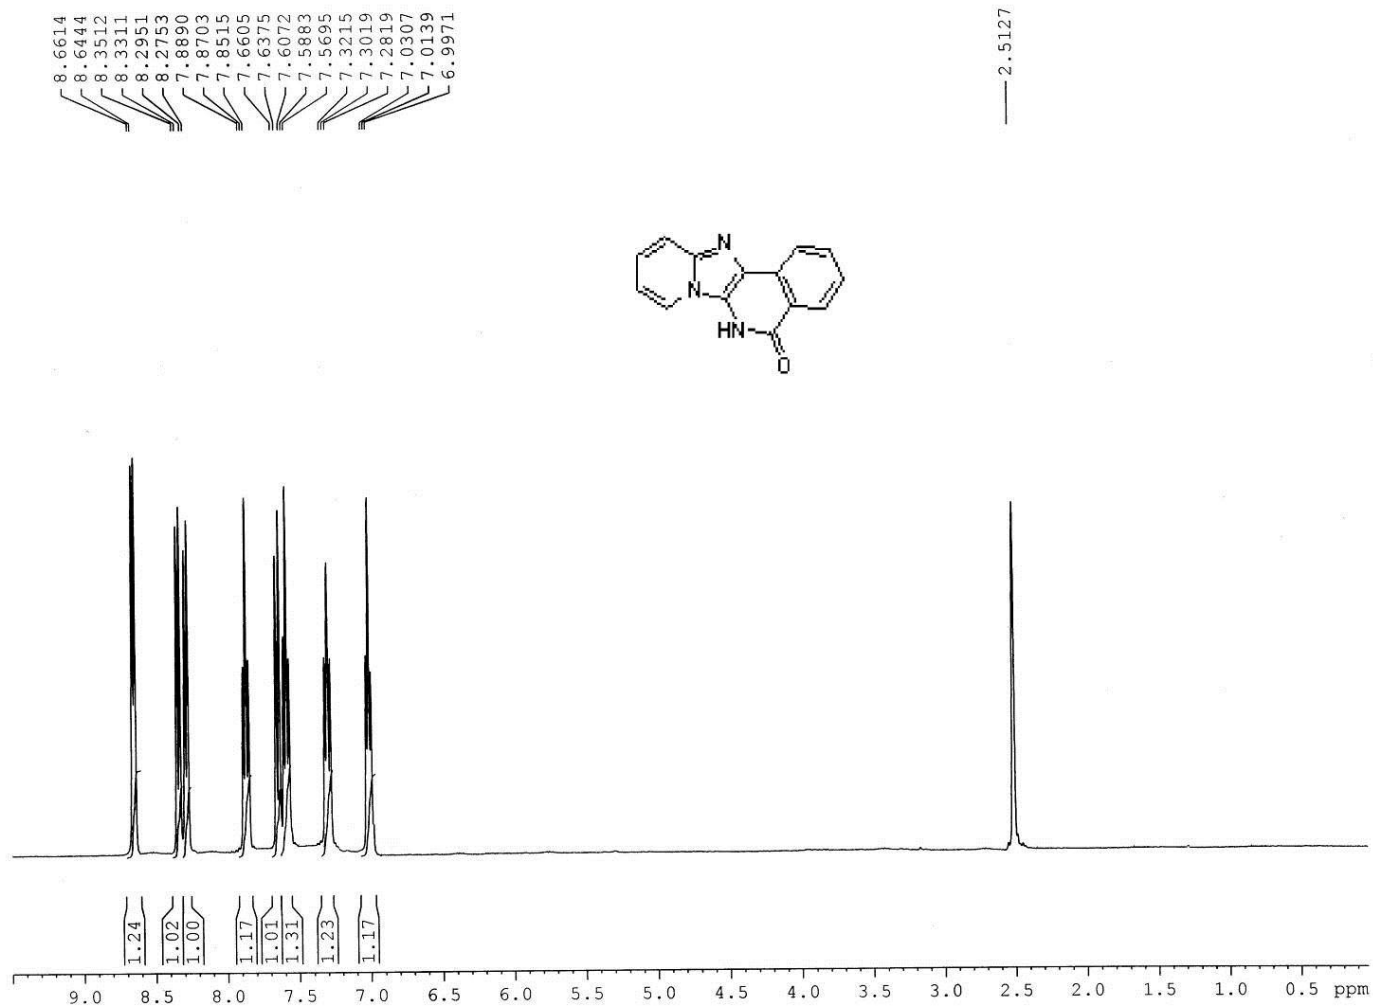



Table 3, entry 1; 7a:  $^{13}\text{C}$  NMR

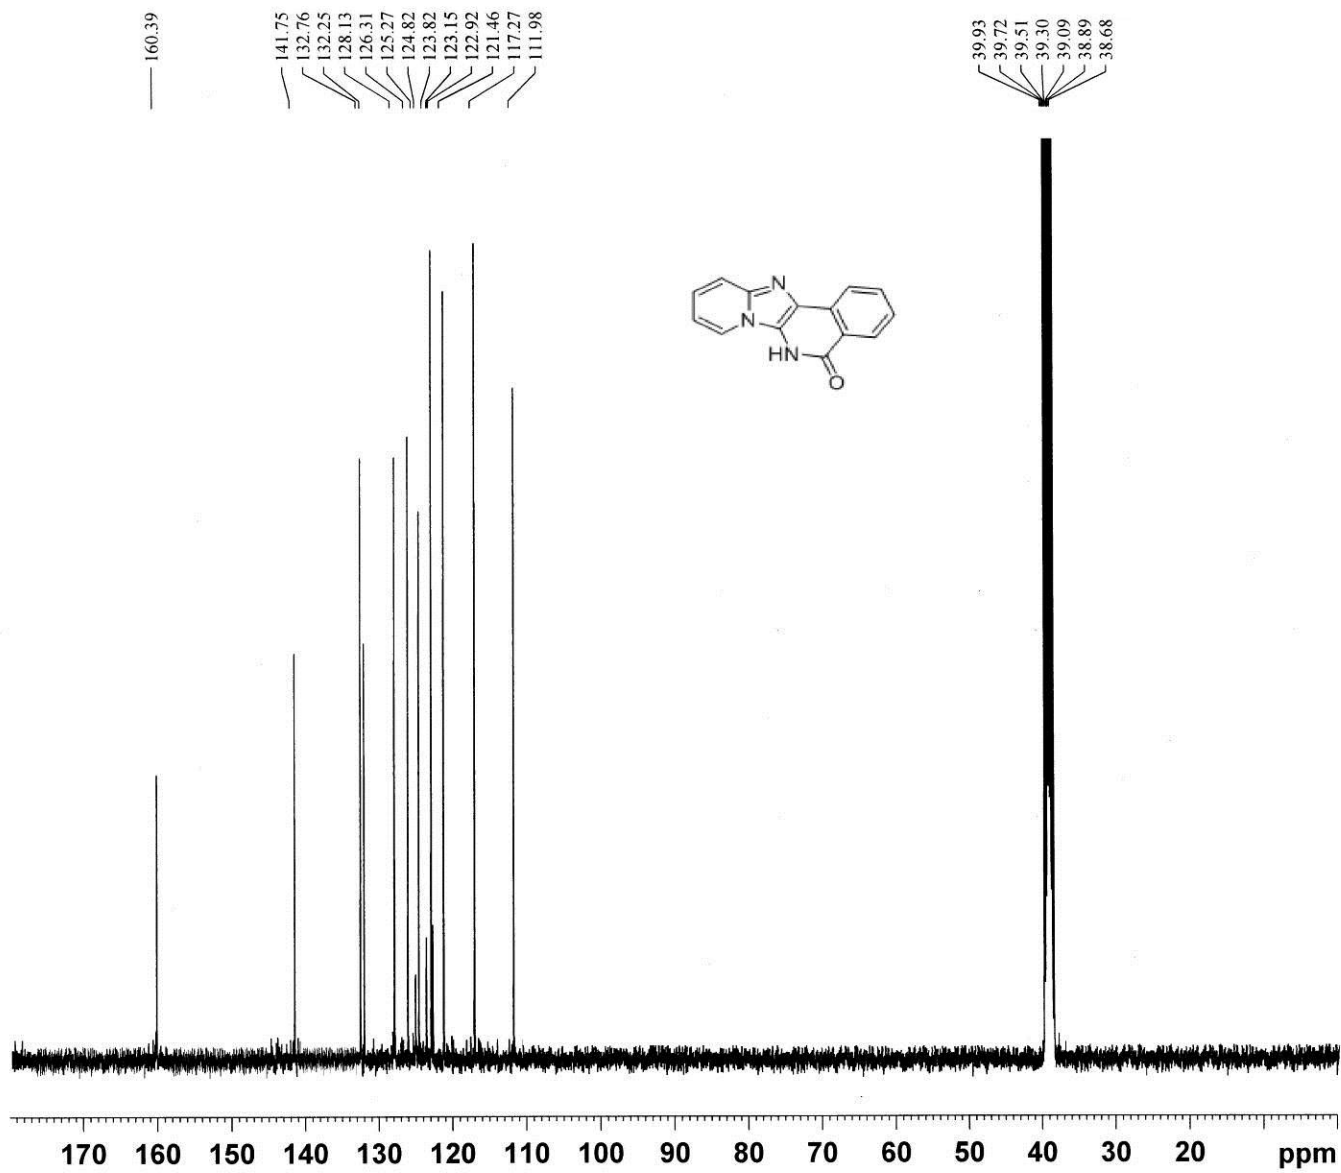

Table 3, entry 2; 7b:  $^1\text{H}$  NMR

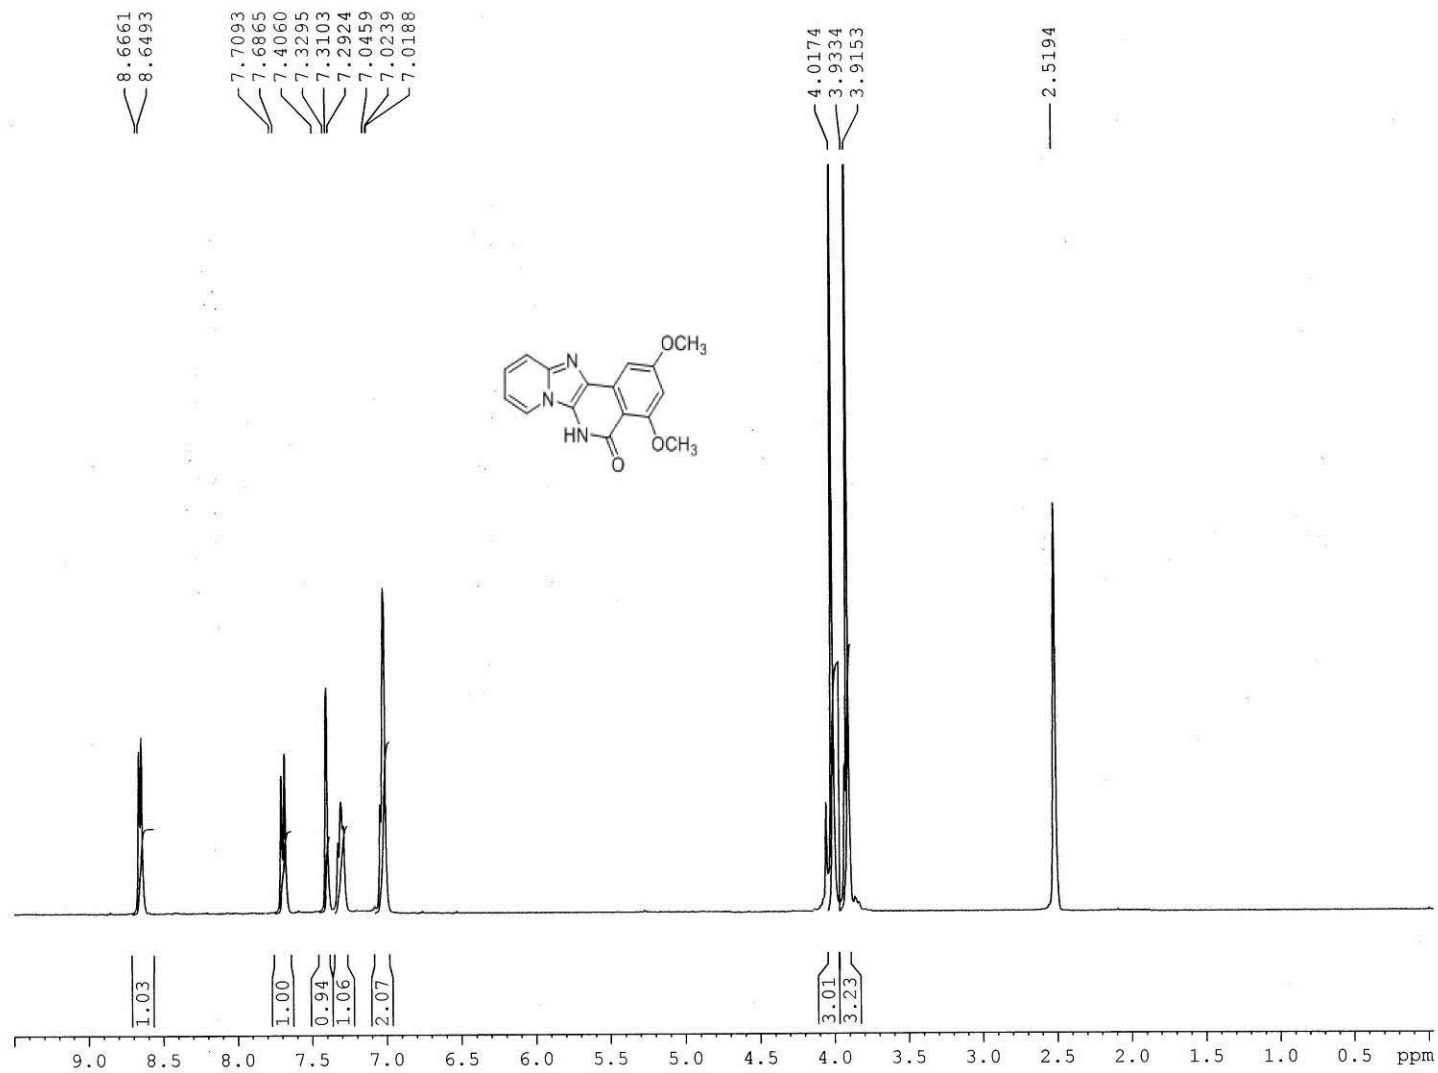

Table 3, entry 2; 7b:  $^{13}\text{C}$  NMR

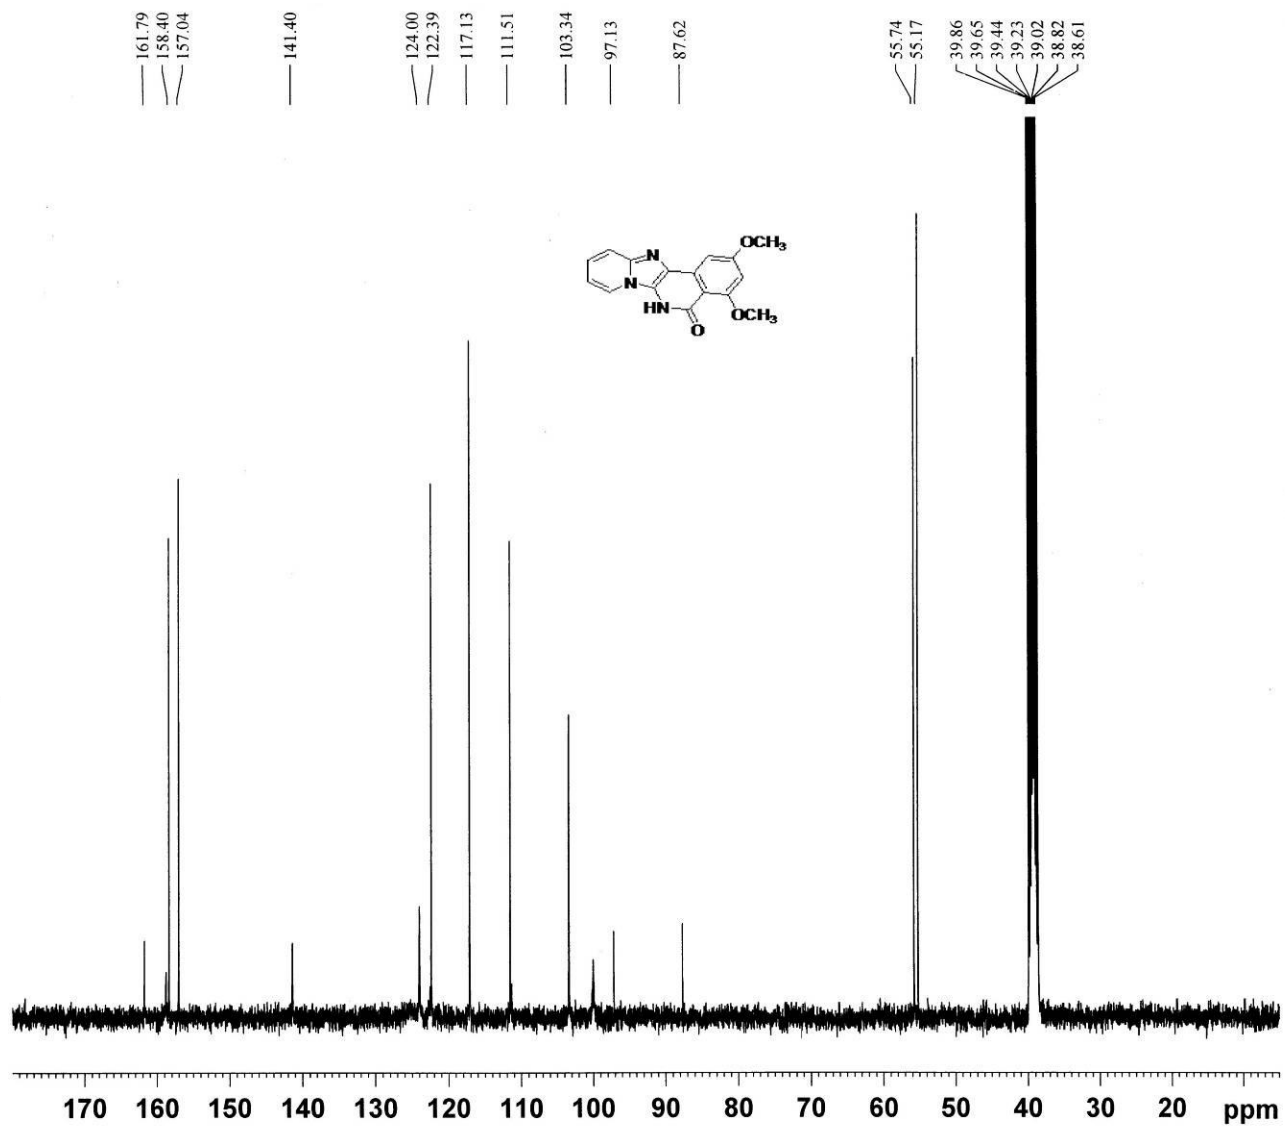

Table 3, entry 3; 7c:  $^1\text{H}$  NMR

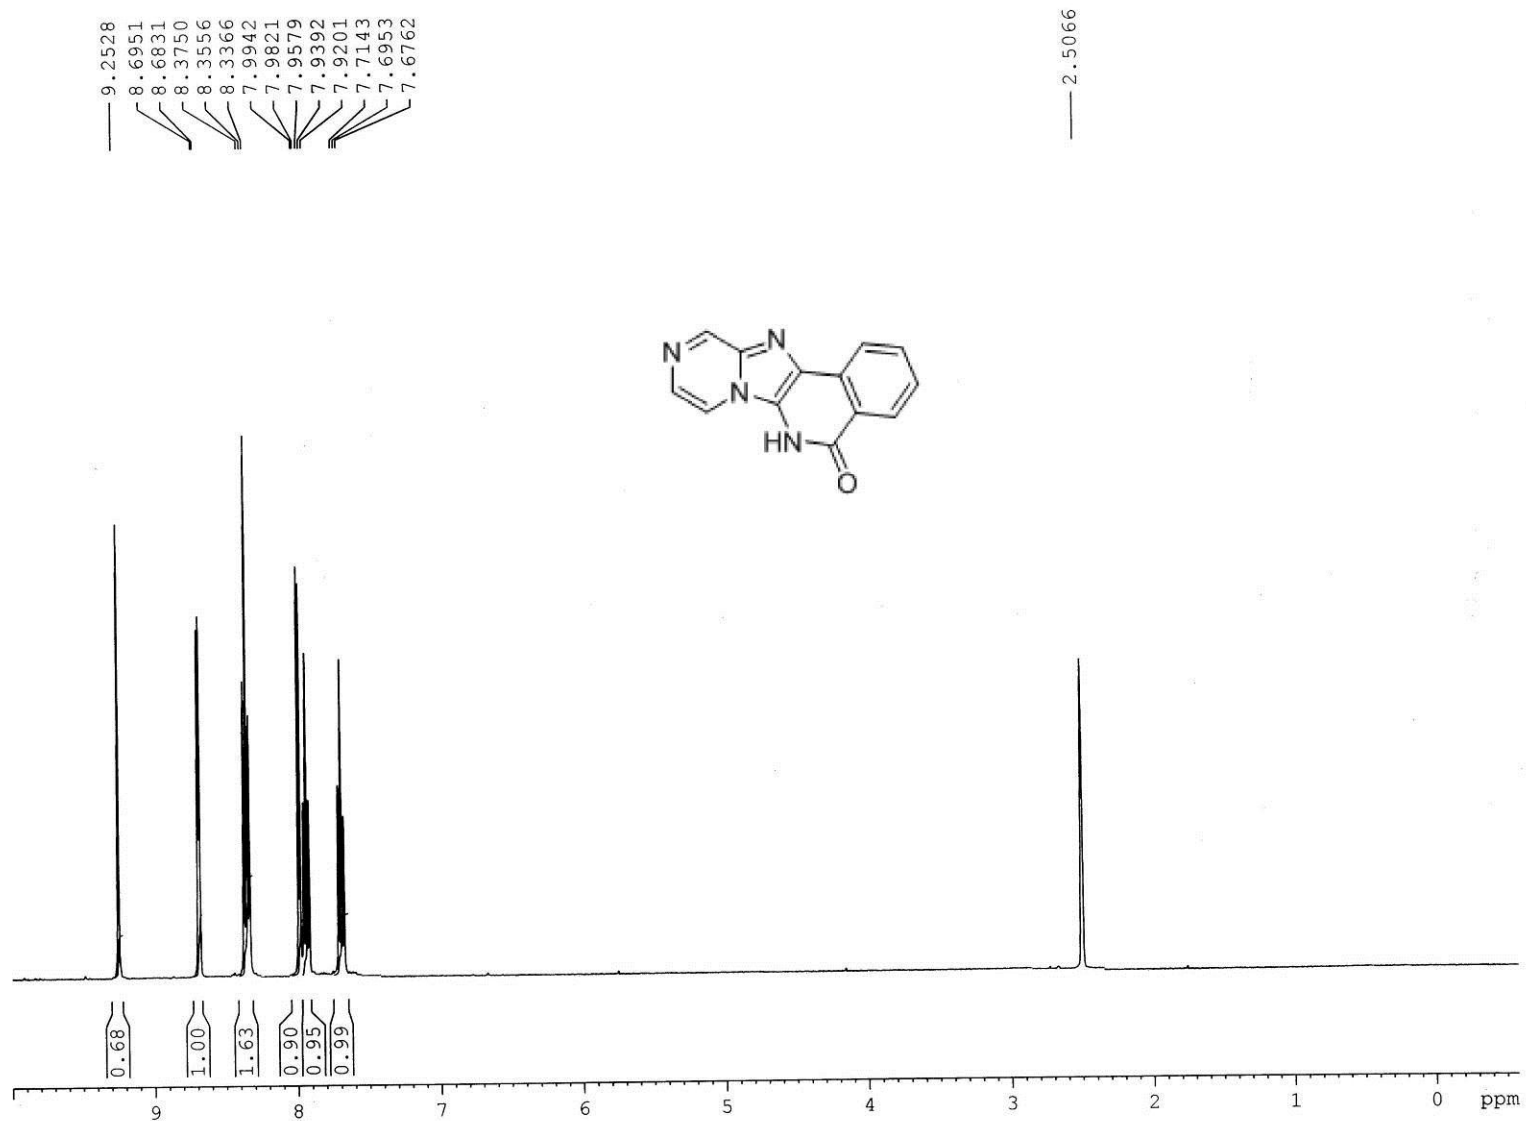

Table 3, entry 3; 7c:  $^{13}\text{C}$  NMR

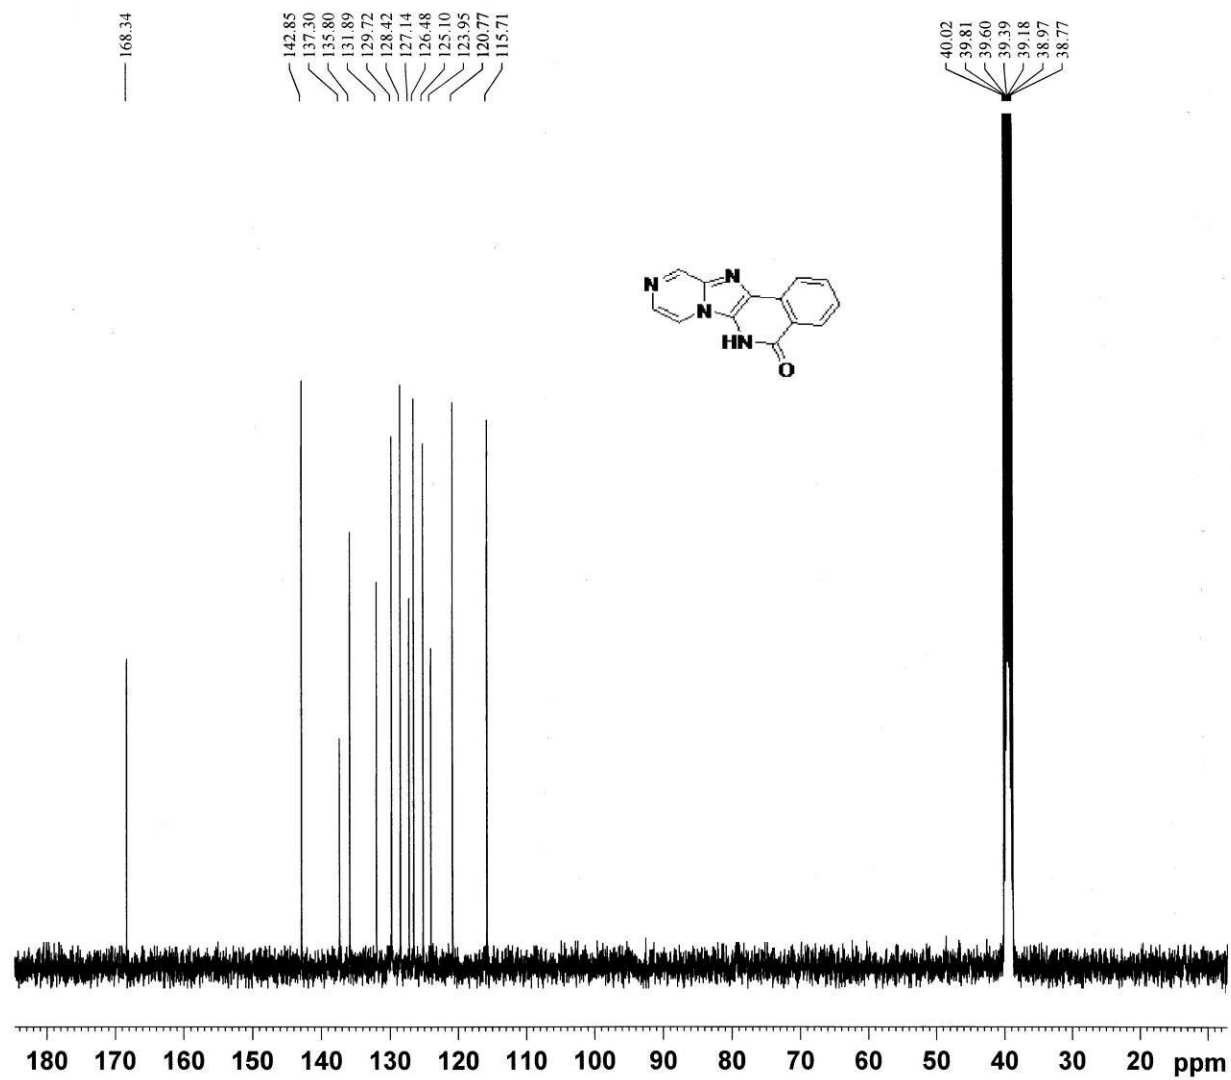

Table 3, entry 4; 7d:  $^1\text{H}$  NMR

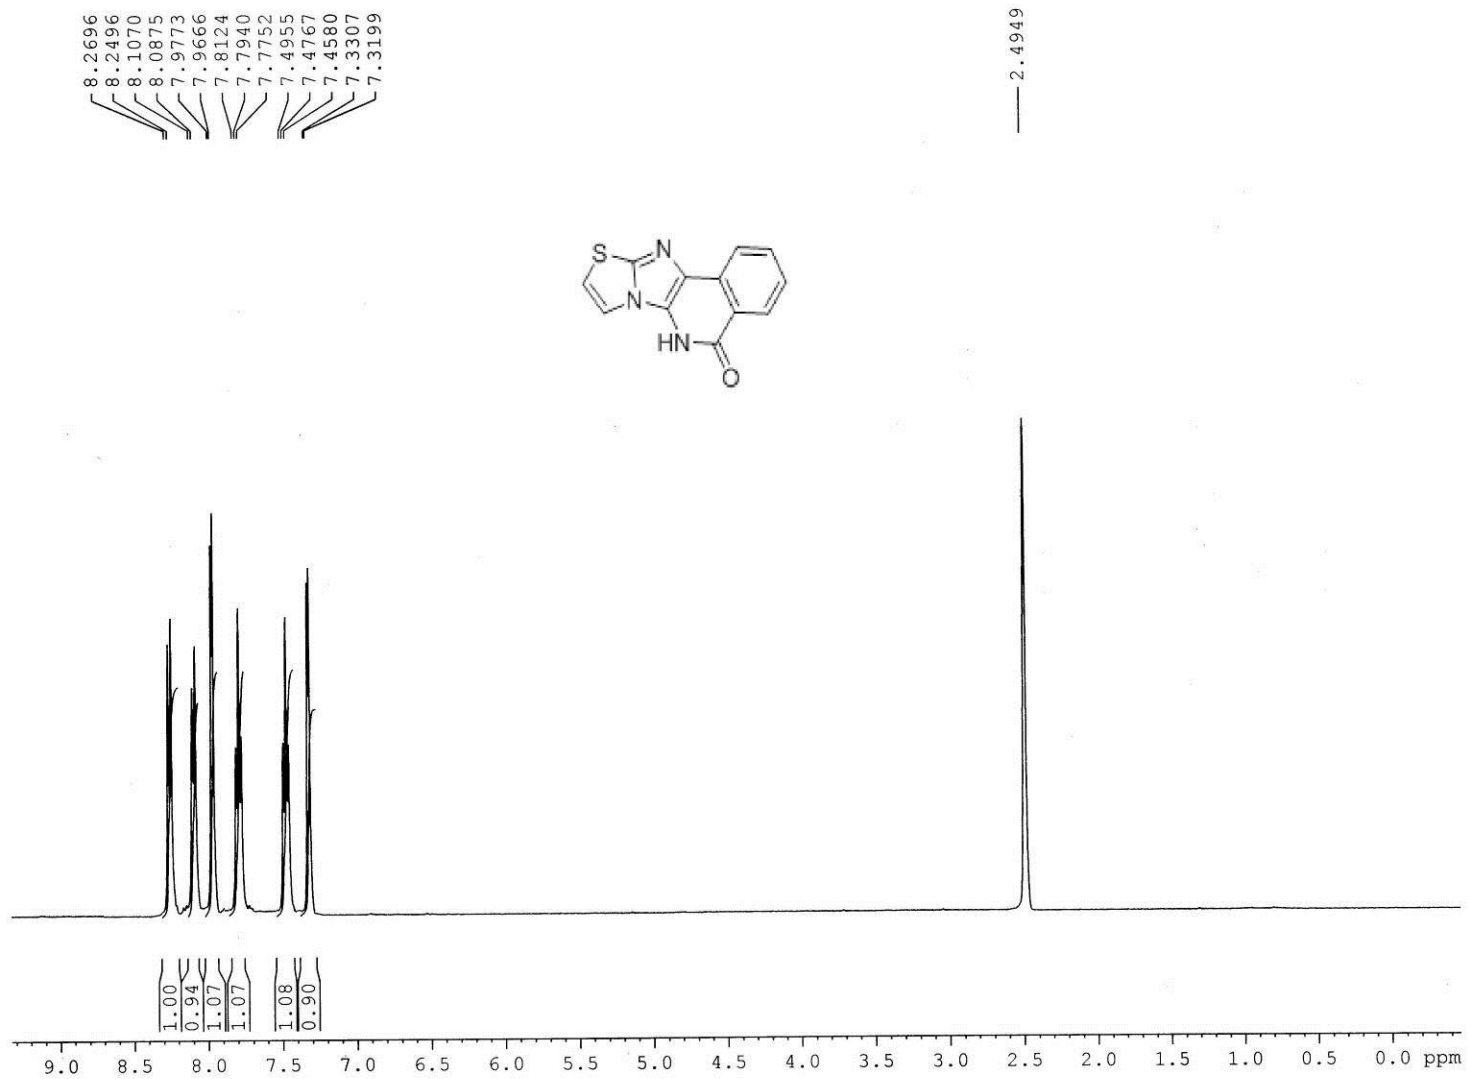

Table 3, entry 4; 7d:  $^{13}\text{C}$  NMR

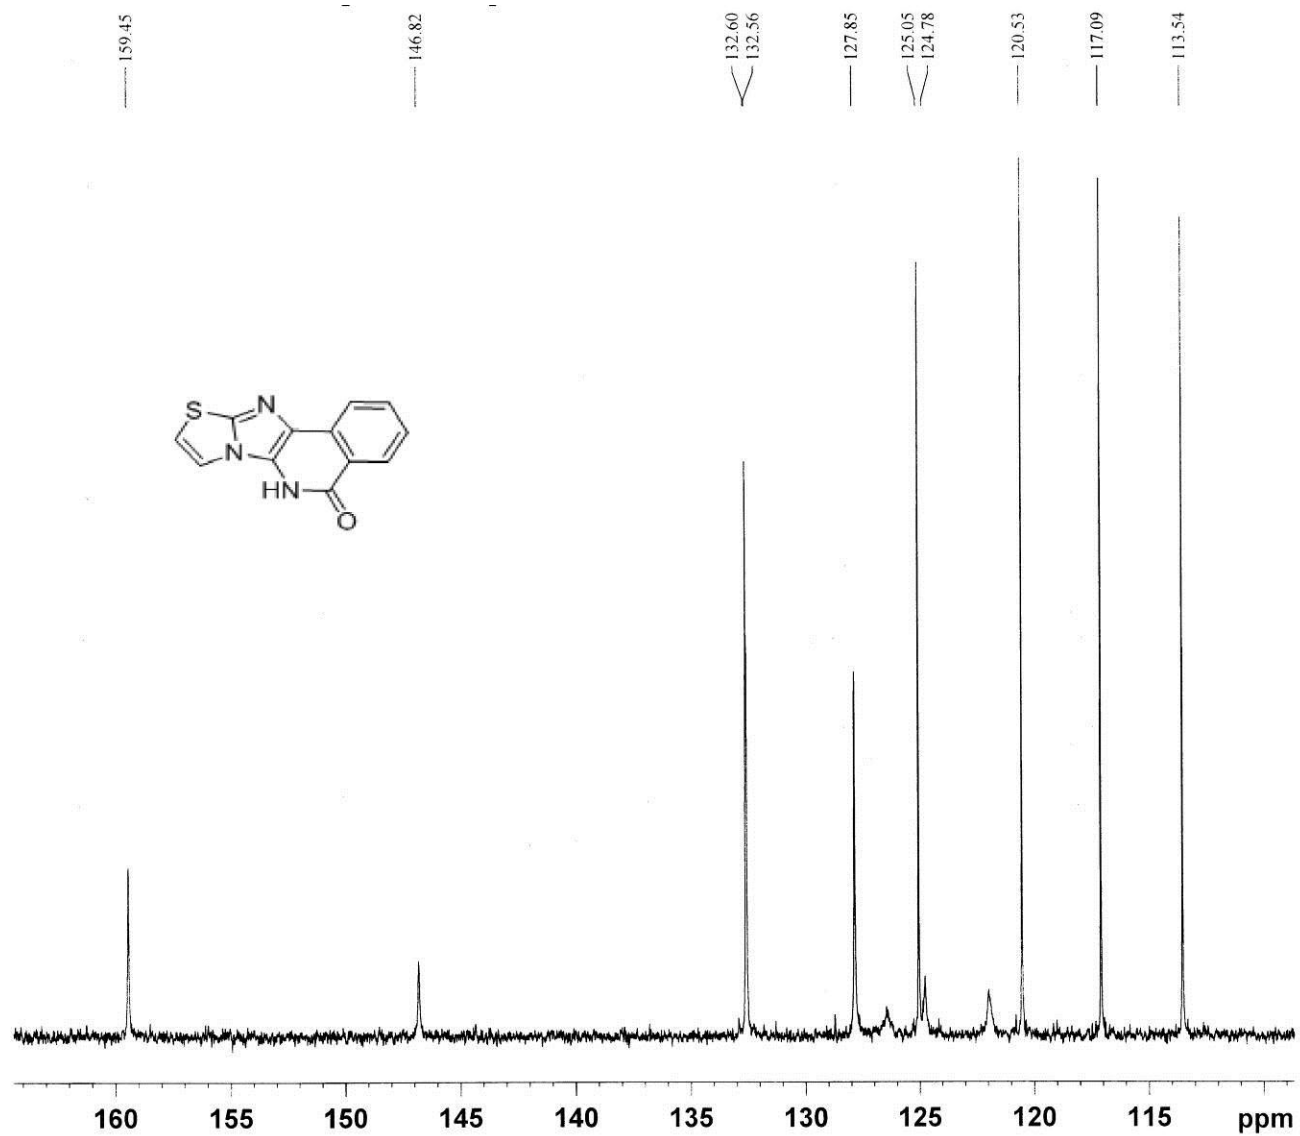

Table 3, entry 5; 7e:  $^1\text{H}$  NMR

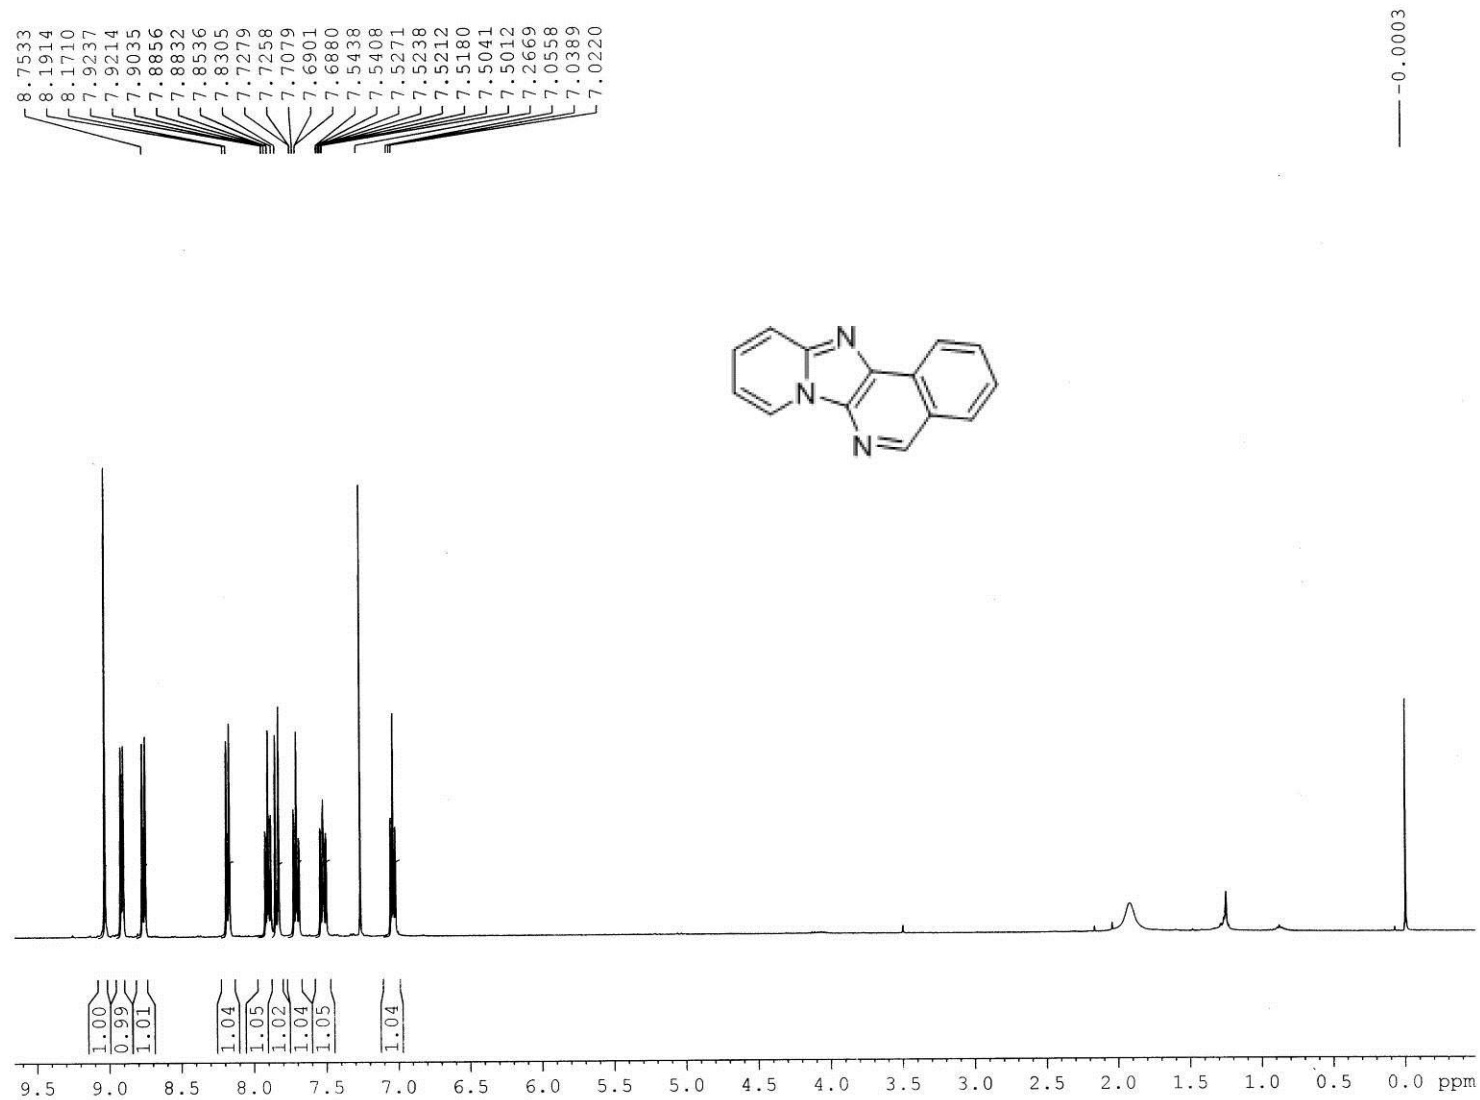



Table 3, entry 6; 7e:  $^{13}\text{C}$  NMR

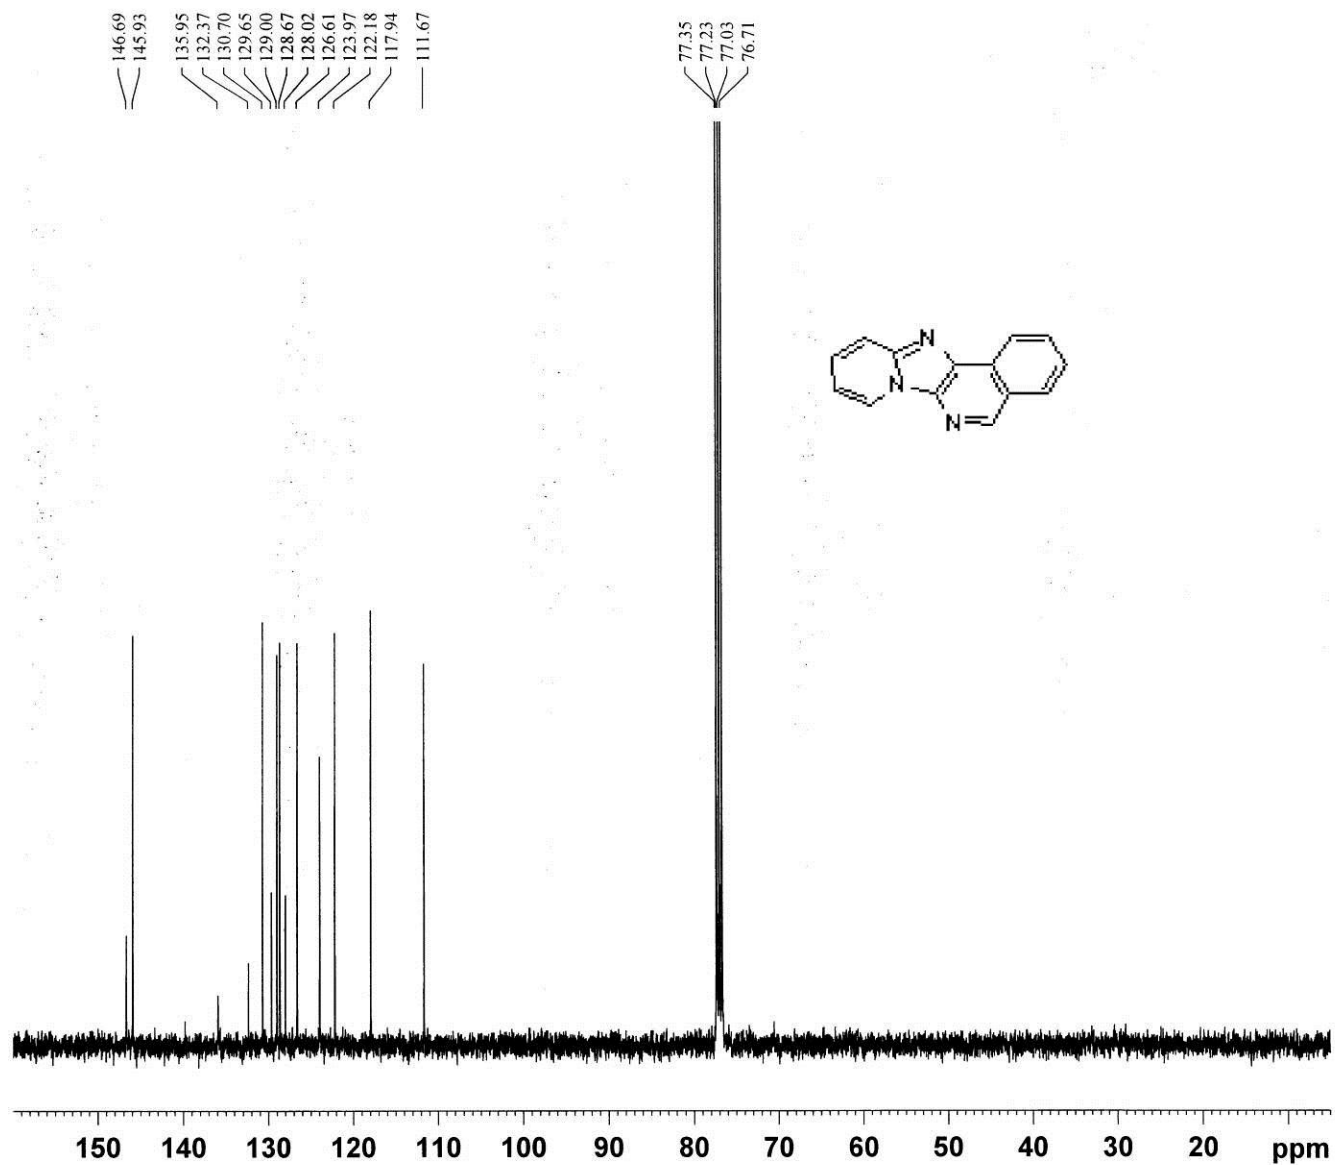

Table 3, entry 6; 7f:  $^1\text{H}$  NMR

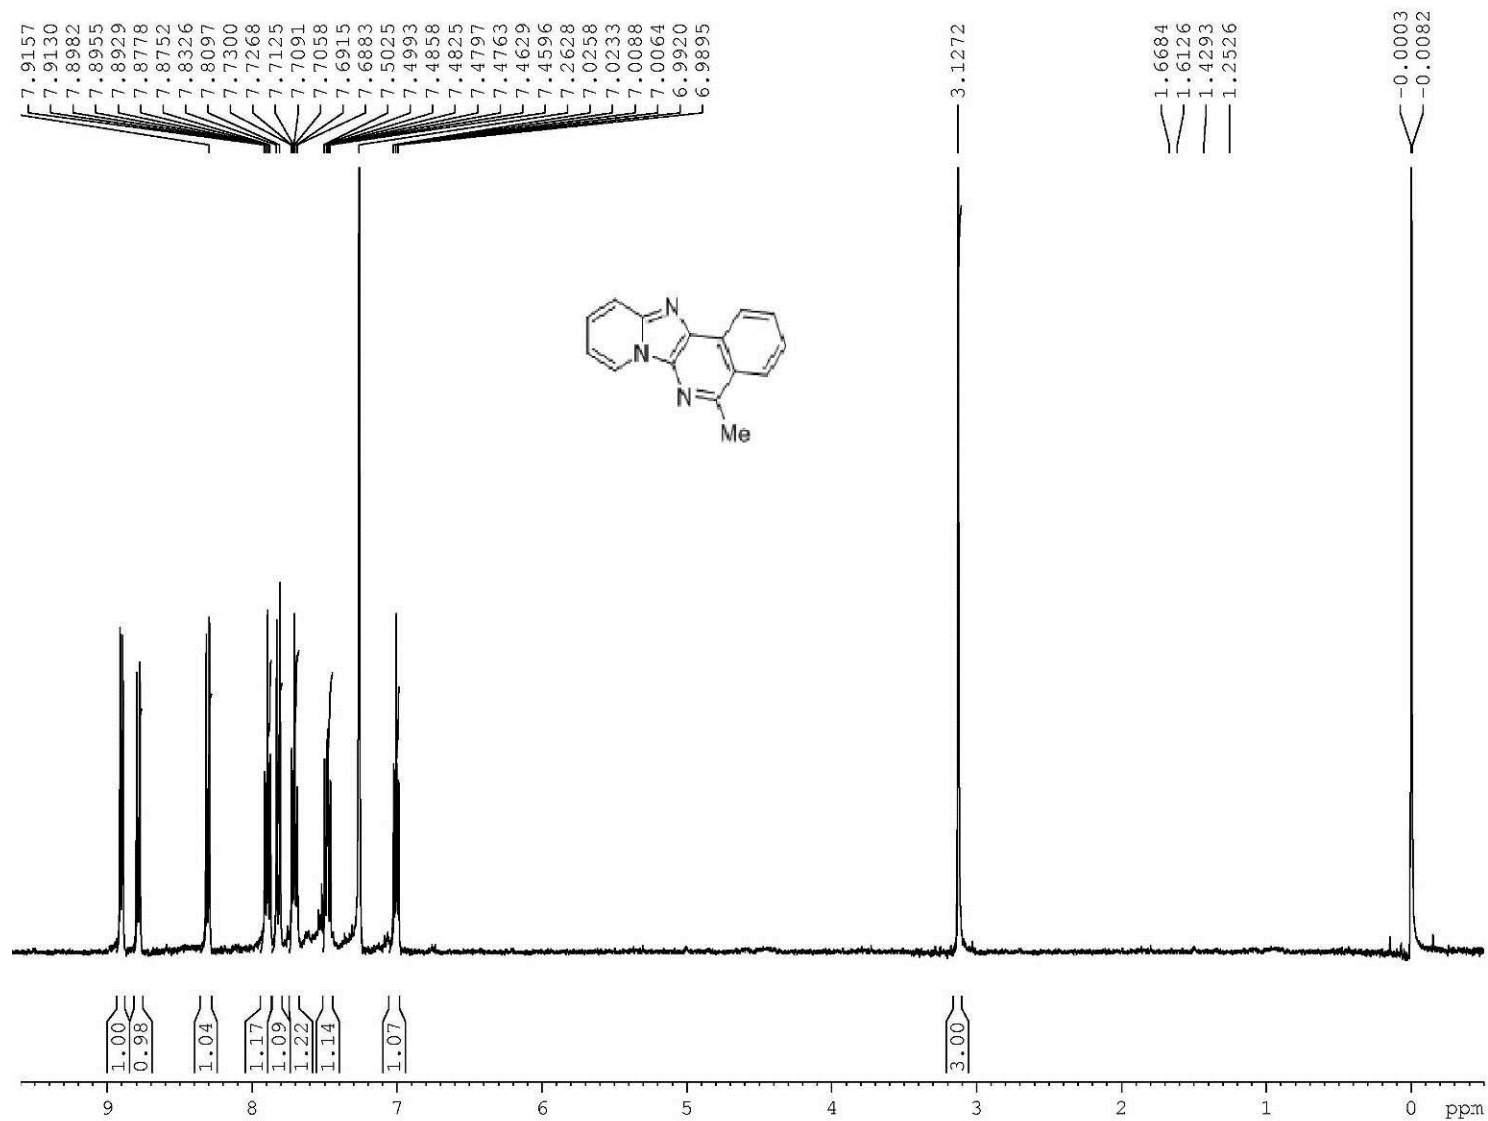

Table 3, entry 6; 7f:  $^{13}\text{C}$  NMR

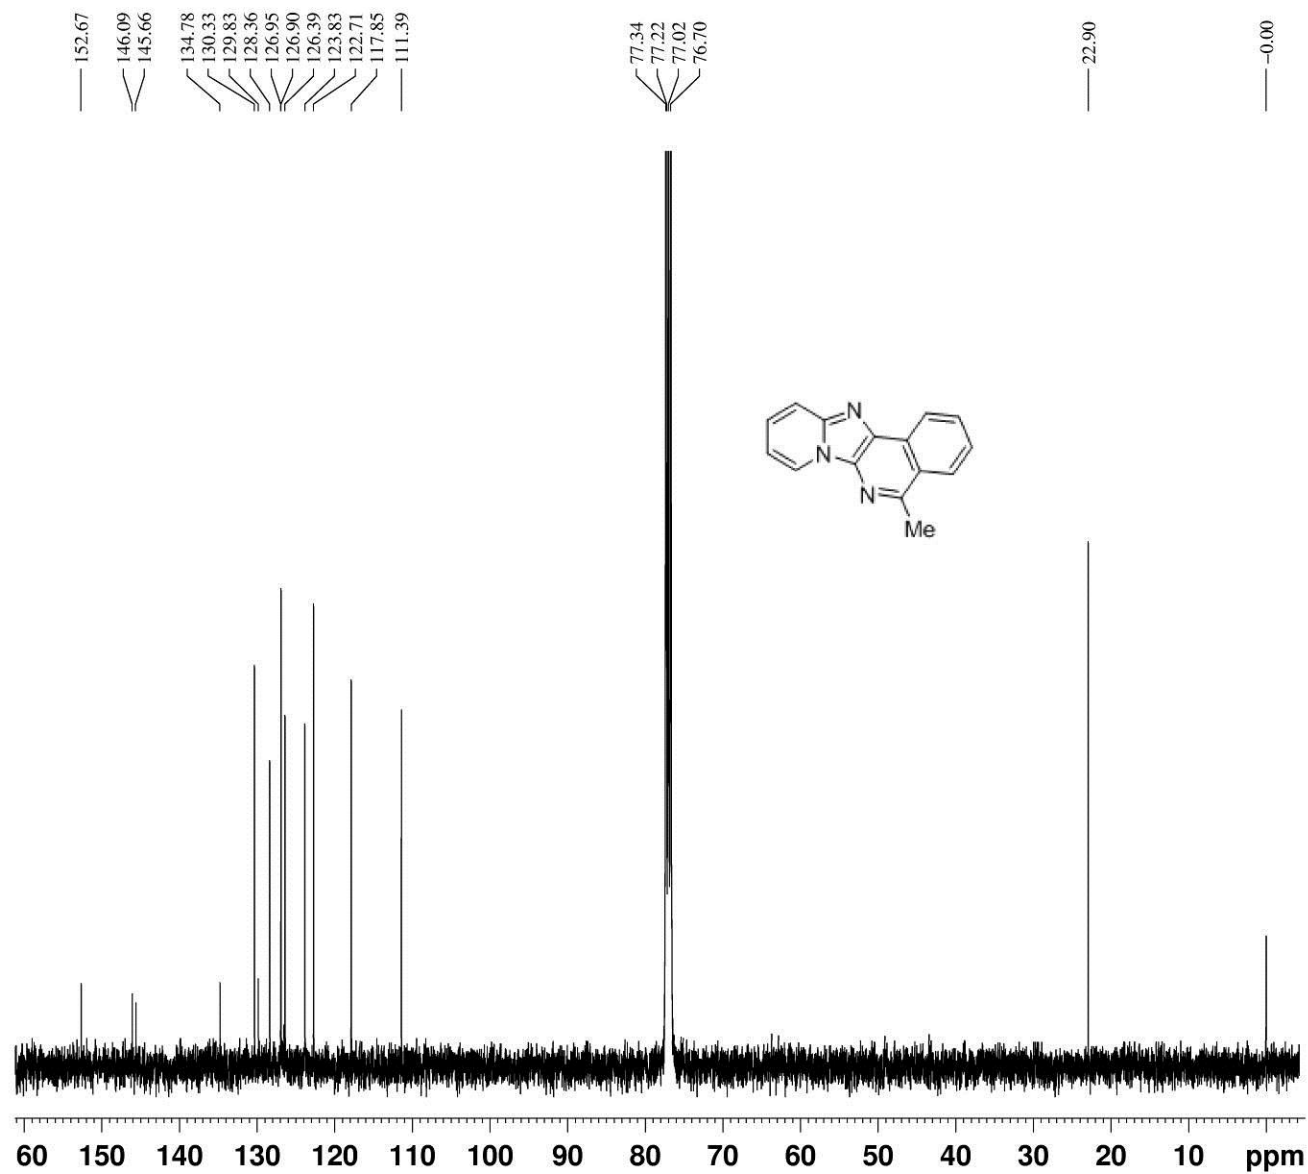

Supplement: c2ob26733k.pdf [file c2ob26733k.pdf]
